# Supplementary material for: Identification of earlier predictors of pregnancy complications through wearable technologies in a Brazilian multicentre cohort: Maternal Actigraphy Exploratory Study I (MAES-I) study protocol
Source: PubMed Central journal article supplement (PMC6500316; doi:10.1136/bmjopen-2018-023101), 2019-04-20
Supplement: bmjopen-2018-023101.draft_revisions.pdf [file bmjopen-2018-023101.draft_revisions.pdf]

# BMJ Open

BMJ Open is committed to open peer review. As part of this commitment we make the peer review history of every article we publish publicly available.

When an article is published we post the peer reviewers' comments and the authors' responses online. We also post the versions of the paper that were used during peer review. These are the versions that the peer review comments apply to.

The versions of the paper that follow are the versions that were submitted during the peer review process. They are not the versions of record or the final published versions. They should not be cited or distributed as the published version of this manuscript.

BMJ Open is an open access journal and the full, final, typeset and author-corrected version of record of the manuscript is available on our site with no access controls, subscription charges or pay-per-view fees (<http://bmjopen.bmj.com>).

If you have any questions on BMJ Open's open peer review process please email [editorial.bmjopen@bmj.com](mailto:editorial.bmjopen@bmj.com)

# BMJ Open

## The identification of early predictors of pregnancy complications through wearable technologies in a Brazilian multicenter cohort: Maternal Actigraphy Exploratory Study I (MAES-I)

|                               |                                                                                                                                                                                                                                                                                                                                                                                                                                                                                                                                                                                                                                                                                                                                                                                                                                                                                                                                                                                                                                                                                   |
|-------------------------------|-----------------------------------------------------------------------------------------------------------------------------------------------------------------------------------------------------------------------------------------------------------------------------------------------------------------------------------------------------------------------------------------------------------------------------------------------------------------------------------------------------------------------------------------------------------------------------------------------------------------------------------------------------------------------------------------------------------------------------------------------------------------------------------------------------------------------------------------------------------------------------------------------------------------------------------------------------------------------------------------------------------------------------------------------------------------------------------|
| Journal:                      | <i>BMJ Open</i>                                                                                                                                                                                                                                                                                                                                                                                                                                                                                                                                                                                                                                                                                                                                                                                                                                                                                                                                                                                                                                                                   |
| Manuscript ID                 | bmjopen-2018-023101                                                                                                                                                                                                                                                                                                                                                                                                                                                                                                                                                                                                                                                                                                                                                                                                                                                                                                                                                                                                                                                               |
| Article Type:                 | Protocol                                                                                                                                                                                                                                                                                                                                                                                                                                                                                                                                                                                                                                                                                                                                                                                                                                                                                                                                                                                                                                                                          |
| Date Submitted by the Author: | 30-Mar-2018                                                                                                                                                                                                                                                                                                                                                                                                                                                                                                                                                                                                                                                                                                                                                                                                                                                                                                                                                                                                                                                                       |
| Complete List of Authors:     | <p>Souza, Renato; Universidade Estadual de Campinas, Obstetrics and Gynecology</p> <p>Cecatti, Jose; University of Campinas, Obstetrics and Gynecology</p> <p>Mayrinki, Jussara; Universidade Estadual de Campinas, Obstetrics and Gynecology</p> <p>Galvão, Rafael; Universidade Estadual de Campinas, Obstetrics and Gynecology</p> <p>Costa, Maria Laura; Universidade Estadual de Campinas, Obstetrics and Gynecology</p> <p>Feitosa, Francisco; Universidade Federal do Ceara, Maternidade Escola</p> <p>Rocha Filho, Edilberto; Universidade Federal de Pernambuco, Obstetrics and Gynecology</p> <p>Leite, Debora; Universidade Federal de Pernambuco, Obstetrics and Gynecology</p> <p>Vettorazzi, Janete; Universidade Federal do Rio Grande do Sul, Obstetrics and Gynecology</p> <p>Tedesco, Ricardo; School of Medicine of Jundiai, Obstetrics and Gynecology</p> <p>Santana, Danielly; Universidade Estadual de Campinas, Obstetrics and Gynecology</p> <p>Souza, Joao Paulo; Universidade de Sao Paulo Faculdade de Medicina de Ribeirao Preto, Social Medicine</p> |
| Keywords:                     | wearable technologies, actigraph, physical activity, sleep patterns, pregnancy complications                                                                                                                                                                                                                                                                                                                                                                                                                                                                                                                                                                                                                                                                                                                                                                                                                                                                                                                                                                                      |
|                               |                                                                                                                                                                                                                                                                                                                                                                                                                                                                                                                                                                                                                                                                                                                                                                                                                                                                                                                                                                                                                                                                                   |

SCHOLARONE™  
Manuscripts

## STUDY PROTOCOL

### **The identification of early predictors of pregnancy complications through wearable technologies in a Brazilian multicenter cohort: Maternal Actigraphy Exploratory Study I (MAES-I)**

Renato T. Souza <sup>1</sup>, Jose G. Cecatti <sup>1#</sup>, Jussara Mayrink <sup>1</sup>, Rafael B. Galvao <sup>1</sup>, Maria L. Costa <sup>1</sup>, Francisco E. Feitosa <sup>2</sup>, Edilberto A Rocha Filho <sup>3</sup>, Débora F Leite <sup>1,3</sup>, Janete Vettorazzi <sup>4</sup>, Ricardo P Tedesco <sup>5</sup>, Danielly S Santana <sup>1,5</sup>, Joao P. Souza <sup>6</sup>, for the MAES-I Study Group\*

#### **Affiliations**

<sup>1</sup> Department of Obstetrics and Gynecology, University of Campinas (UNICAMP) School of Medical Sciences, Campinas, SP, Brazil

<sup>2</sup> MEAC – School Maternity of the Federal University of Ceará, in Fortaleza, CE, Brazil

<sup>3</sup> Department of Maternal and Child Health, Maternity of Clinic Hospital, Federal University of Pernambuco, in Recife, PE, Brazil

<sup>4</sup> Department of Obstetrics and Gynecology, Maternity of the Clinic Hospital, Federal University of RS, Porto Alegre, RS, Brazil

<sup>5</sup> Department of Obstetrics and Gynecology, Jundiaí Medical School, Jundiaí, SP, Brazil

<sup>6</sup> Department of Social Medicine, Ribeirão Preto Medical School, University of Sao Paulo, Ribeirão Preto, SP, Brazil

\*Membership of the MAES-I study group is provided in the Acknowledgments.

**E-mail addresses:** RT Souza: [renatotsouzasp@gmail.com](mailto:renatotsouzasp@gmail.com); JG Cecatti: [cecatti@unicamp.br](mailto:cecatti@unicamp.br); J Mayrink: [jussaramayrink@gmail.com](mailto:jussaramayrink@gmail.com); RB Galvão: [rafaelbfg@gmail.com](mailto:rafaelbfg@gmail.com); ML Costa: [mlaura@unicamp.br](mailto:mlaura@unicamp.br); FE Feitosa: [edson.lucena@hotmail.com](mailto:edson.lucena@hotmail.com); EA Rocha Filho: [edilbertorocha@globo.com](mailto:edilbertorocha@globo.com); DF Leite: [debora.leite@ufpe.br](mailto:debora.leite@ufpe.br); J Vettorazzi: [janetev@terra.com.br](mailto:janetev@terra.com.br); RP Tedesco: [rp.tedesco@yahoo.com.br](mailto:rp.tedesco@yahoo.com.br); DS Santana: [dany.fmj@terra.com.br](mailto:dany.fmj@terra.com.br); JP Souza: [jp.souza@usp.br](mailto:jp.souza@usp.br)

#### **#Corresponding Author**

JG Cecatti

DO&G, University of Campinas

R. Alexander Fleming, 101

Campinas, SP, 13083-881

Brazil

E-mail: [cecatti@unicamp.br](mailto:cecatti@unicamp.br)

## Abstract

**Introduction:** non-invasive tool capable of identifying predictors of maternal complications would be a step forward on the improvement of maternal and perinatal health. There is association between modification of physical activity (PA) and sleep-wake patterns and the occurrence of inflammatory, metabolic, pathologic conditions as chronic diseases. The actigraph device is validated to estimate PA and sleep-wake patterns and might be valuable to identify predictors for maternal complications, widening the window of opportunity to prevent, diagnose or treat specific conditions prior to the development of typical symptoms or clinical signs, assessing PA and sleep-wake patterns during pregnancy.

**Methods and analysis:** A cohort will be held in 5 centres from the Brazilian Network for Studies on Reproductive and Perinatal Health. MAES-I will enroll 400 low-risk nulliparous women that will wear the actigraph device on the wrist during day and night (24h/day) uninterruptedly from 19-21 weeks until childbirth. Changes in PA and sleep-wake patterns through pregnancy will be analyzed, considering gestational age ranges, in women with and without maternal complications during pregnancy, such as preeclampsia, preterm birth (spontaneous and provider-initiated), gestational diabetes, maternal haemorrhage and also perinatal outcomes. A predictive model for screening pregnant women for risk of specific adverse maternal and perinatal outcomes is planned to be then developed using the actigraphy data.

**Ethics and Dissemination:** MAES-I study has been reviewed and approved by each Institutional Review Board (IRB) and also by the National Council for Ethics in Research. Detailed information of the study is provided in the Brazilian Cohort website ([www.medscinet.com/samba](http://www.medscinet.com/samba)) and findings will be publicized in scientific literature and Institutional webpages.

**Discussion:** Multiple benefits might arise from the development of a predictive tool for maternal complications during pregnancy, providing a new concept for antenatal care monitoring programmes.

**Keywords:** wearable technologies; actigraph; physical activity; sleep patterns; sleep-wake cycle; prediction; pregnancy complications.

**Strengths and limitations of this study**

- This multicentre cohort will collect comprehensive data on the main maternal and perinatal complications as pre-eclampsia, small for gestational age/fetal growth restriction, preterm birth and gestational diabetes mellitus.
- Physical activity and sleep patterns will be estimated through an innovative wearable device used in the natural environment of the study subject.
- Physical activity and sleep patterns will be estimated from the beginning of the second half of pregnancy until delivery, covering a wide interval during pregnancy and enabling the study of PA and sleep patterns changes throughout pregnancy.
- One possible limitation refers to the uncovered first half of pregnancy regarding this information.

## Background

Reducing the global maternal mortality ratio to less than 70 per 100,000 live births by 2030 is one of the targets of the new United Nations Sustainable Development Goals [1]. Multiple challenges need to be tackled to achieve this target, but the 2016-2030 health and development agenda goes well beyond mortality reduction. The Global Strategy for Women's, Children's and Adolescent's Health aims to ensure that every newborn, women and child not only survive but thrive. This will only be possible if a transformative agenda, with innovation at the central stage, is put into action [2].

One of the major challenges that need to be addressed is optimizing the recognition of early predictors and identifiers of maternal and perinatal complications. Delays in diagnosing and managing maternal complications have been associated with poor outcomes [3]. The reduced self-perception of clinical signs related to maternal complications, difficulties in accessing the health system and poor quality of care may contribute to the late identification of complications and worsened prognosis. The development of a non-invasive Antenatal Care (ANC) tool capable of identifying maternal sub-clinical signs during pregnancy may provide the window of opportunity for early identification of abnormal patterns of physiologic parameters related to pregnancy complications and enable their prevention or early treatment. Shortening the time between the onset of a complication and the initiation of the appropriate management allow for secondary prevention and reduction of maternal morbidity and mortality [3–7].

Pervasive computing (i.e. the trend towards embedding microprocessors in everyday-life objects so they can generate data) and wearable technology (i.e. clothing and accessories incorporating computer and advanced electronic technologies such as wrist and/or waistband sensors) are ubiquitous and able to generate a new dataset that needs to be correlated with pregnancy outcomes. Preterm birth and preeclampsia, for instance, are two important pregnancy complications that have a relatively long subclinical phase before the appearance of signs or symptoms [8,9]. It is plausible that during this subclinical phase of certain conditions the pattern of physical activity (PA) or sleep-wake rhythm is affected in some way and this change could be captured through wearable devices. Although some studies show that PA patterns and

1  
2  
3 circadian rhythm abnormalities (actigraphy) may be related to systemic inflammation  
4 and diseases in the general population [10,11], published literature correlating  
5 wearable technology data and maternal complications are very scarce.  
6  
7

8 The human circadian rhythm is ruled by endogenous physiologic mechanisms and  
9 environmental stimuli [12]. There is solid evidence showing that modification of  
10 circadian rhythm or sleep and PA patterns are an underlying condition related to  
11 inflammatory, degenerative and/or metabolic chronic diseases as diabetes,  
12 hypertension, and cancer [13]. Circadian misalignment is defined as having  
13 inappropriate timed sleep and wake, misplaced feeding periods and modification of  
14 activity behavior.  
15  
16  
17  
18  
19

20  
21 The determination of cause or consequence effect between these modifications and  
22 the development of pathological conditions is a complex task. It seems that changes in  
23 appetite-stimulating hormones, glucose metabolism, inflammatory markers, and mood  
24 are some of the related pathways [13–15]. Leproult *et al.* evaluated the effect of  
25 circadian misalignment on metabolic and inflammation markers in cardiovascular  
26 disease [15]. The insulin action and release, and also the levels of some inflammatory  
27 markers that are predictors for cardiovascular diseases, were abnormal in individuals  
28 with circadian misalignment. The mechanisms involved in the association between  
29 changes of PA pattern and pathologic conditions seem to be of multiple etiologies. Sani  
30 *et al.* assessed the circadian rhythm of more than 2,300 African descendant adults. More  
31 than evaluating physical activity itself, the authors aimed to identify chronobiologic  
32 patterns of adults from different socioeconomic settings. The study identified that  
33 chronobiologic behavior can vary depending on individual BMI, socioeconomic  
34 background, work type and time of sunlight exposure. Possibly, many other factors are  
35 involved in modifications of chronobiologic behavior, such as pathologic conditions.  
36 Some metabolic, cognitive, cardiovascular and other chronic degenerative diseases  
37 have been associated with particular patterns of PA and sleep [10,11,16–18]. A  
38 previous observational study assessed various sleep parameters during pregnancy, e.g.  
39 sleep onset latency (SOL), wake after sleep onset (WASO) and total nocturnal sleep  
40 time (TST). Difficulty in initiating sleep in early pregnancy was associated with higher  
41 body mass index, greater weight gain and higher blood pressure during pregnancy  
42  
43  
44  
45  
46  
47  
48  
49  
50  
51  
52  
53  
54  
55  
56  
57  
58  
59  
60

1  
2  
3 [17]. Palagini *et al.* reviewed clinical evidence between chronic sleep loss and  
4 pregnancy adverse outcomes, discussing common mechanisms of stress system  
5 activation [19]. Low-quality evidence suggests an association between sleep loss and  
6 prenatal depression, gestational diabetes, preeclampsia, abnormal length of labour,  
7 caesarean delivery, abnormal fetal growth, and preterm birth. Those results  
8 corroborate with other findings regarding pregnancy and sleep disorders [20–23].  
9

10  
11  
12  
13 The assessment of PA and the sleep patterns can be performed using small wrist (or  
14 waist) devices similar to a regular watch (actigraphy technology). The type of sensor,  
15 batteries, materials and output data have been substantially developed in recent  
16 years, enabling low cost, comfort, discretion and performance [24]. Nowadays there  
17 are devices that are portable, lightweight and with a large capacity to storage  
18 information, including a software with automatic scoring algorithms packages for the  
19 detection of wakefulness, sleep periods and PA [24,25]. The actigraphy estimation of  
20 PA and sleep patterns is validated as a proxy for chronobiologic behavior [26–29] and 7  
21 to 14 days using the actigraph device provides reliable estimates of PA behavior in  
22 older adults [30–32]. Both hip and wrist devices show reliable and acceptable  
23 performance in estimating PA and sleep-wake patterns [33–36].  
24  
25  
26  
27  
28  
29  
30  
31  
32

33 The main advantages of using wearable devices for actigraphy is the non-invasiveness,  
34 24/7 monitoring of the circadian pattern and PA, and informing sleep habits and  
35 parameters in the user natural environment [24,25,28]. We propose an innovative and  
36 strategic approach to monitor PA and sleep-wake patterns during pregnancy,  
37 establishing a large database comprised of clinical, epidemiological, PA and sleep-wake  
38 variables potentially capable of composing a prediction model for maternal  
39 complications during pregnancy. The main goal of this study is to identify early  
40 predictors of pregnancy complications by correlating data generated on PA and sleep  
41 patterns through wearable devices (wristband sensors) with maternal and perinatal  
42 complications and outcomes.  
43  
44  
45  
46  
47  
48  
49

## 50 **Methods/Design**

### 51 ***Study design***



1  
2  
3 We will conduct a cohort study of 400 low-risk pregnant women using wrist sensor  
4 bands able to capture information on daily physical activity and sleep patterns  
5 (exposure). This cohort study will be implemented in 5 ANC clinics linked to obstetric  
6 units in 3 different regions of Brazil that are already part of the Brazilian Network for  
7 Studies on Reproductive and Perinatal Health [37], as shown in Table 1. During a  
8 period of eight months, the ANC clinics will identify eligible cases for using the  
9 wristband sensors. Wearable technology data will be correlated with the occurrence  
10 of pregnancy and childbirth complications and outcomes, thus understood as an  
11 effect.  
12  
13  
14  
15  
16  
17

18 Eligible women will be identified up to 21 weeks of gestation and invited to participate.  
19 A proper consent form will be applied and the women who agree to participate will  
20 receive a wristband sensor to be used starting at 19-21 weeks until childbirth,  
21 uninterruptedly.  
22  
23  
24  
25

### 26 ***Study setting and population***

27  
28 Brazil is a multi-ethnic mixed-race population of diverse resourced settings [38].  
29 Despite the considered high global overall human development index (HDI 0.727) in  
30 2010, the HDI of Brazilian municipalities ranged from 0,862 to 0,418 [39]. The  
31 possibility of considering such mixed population is suitable to explore information  
32 regarding maternal patterns of mobility and sleep, maximizing external validity and  
33 comparisons to other populations. A few reasons might support the study population  
34 focused in low-risk nulliparous women: 1) Previous obstetric history can refer to  
35 known risk factors for many maternal complications such as preterm birth,  
36 preeclampsia, and diabetes [13,40]. Nulliparous women enable unbiased sampling  
37 regarding obstetric history. 2) Women with previous morbidity such as hypertension,  
38 diabetes, nephropathy or others chronic/degenerative diseases are more likely to  
39 present abnormalities of sleep-wake rhythm or physical activity patterns during  
40 pregnancy.  
41  
42  
43  
44  
45  
46  
47  
48  
49  
50

### 51 ***Sampling***

52  
53 The five participating centers are regional referral obstetric units responsible for  
54 antenatal care assistance mainly for high-risk pregnant women. Participating centers  
55  
56  
57  
58  
59  
60

1  
2  
3 are listed in Table 1. Nevertheless, there are primary health care units strategically  
4 linked with these participating centers, enabling the identification and enrollment of  
5 low-risk pregnant women. The recruitment strategies include approaching all eligible  
6 women in these participating centers and their linked facilities. An informed consent  
7 form will be applied for women who agree to participate.  
8  
9

#### 10 11 12 *Eligible women: Low-risk pregnant subjects*

13  
14 There is no international consensus on the criteria for low-risk pregnancies, although  
15 there are several known factors associated with maternal and perinatal adverse  
16 outcomes. A recent study evaluating complications of “low-risk” pregnancies of US  
17 Americans (10 million births from 2011 through 2013) showed that 29% of low-risk  
18 women had an unexpected complication requiring no routine obstetric/neonatal care  
19 [41]. This shows the difficulty in establishing a “low-risk profile” for maternal/perinatal  
20 complications. As an exploratory study, we will exclude potential known confounders  
21 of pre-pregnancy conditions related to adverse maternal or perinatal outcomes as  
22 shown in Table 2, in order to assess PA and sleep patterns of a mostly “normal”  
23 population. Lifestyle habits and body composition (Body mass index, height, etc.)  
24 characteristics, and some non-severe chronic diseases as thyroid disorders, non-severe  
25 anaemia and/or asthma are not among exclusion criteria but may be part of subgroup  
26 analyses (composition of any previous disorder, e.g.). Intra and inter-individual  
27 analyses of PA and sleep patterns enable the identification of potential confounders  
28 affecting primary outcomes, avoiding potential biases.  
29  
30

31  
32 Eligible women will be enrolled between 04-21 weeks. The inclusion and exclusion  
33 criteria are presented in Table 2.  
34  
35

#### 36 37 38 ***Data collection methods***

39  
40 Essentially, MAES I study is comprised of 4 key set points – 3 clinical visits during  
41 pregnancy and a postnatal visit. The clinical visits will be held at 1) between 19-21  
42 weeks; 2) between 27-29 weeks; 3) between 37-39 weeks. At first, second, third and  
43 postnatal visits, additional information regarding maternal history, details on  
44 pregnancy complications, maternal biophysical data (weight, height, skinfolds) and  
45 pregnancy adverse outcomes will be collected following a specific Standard Operating  
46  
47  
48  
49  
50  
51  
52  
53  
54  
55  
56  
57  
58  
59  
60

1  
2  
3 Procedure (SOP) specially developed for MAES-I study. Additionally, the Perceived  
4 Stress Scale [42] and Resilience Scale [43] will be applied during 27-29w visit. Figure 1  
5 shows the set points of MAES-I study.  
6  
7

8 Eligible women will be invited to use a small wrist device similar to a regular watch  
9 (GENEActiv Original – Activinsights®). The device contains sensors that estimate PA and  
10 sleep-awake patterns through a proper software algorithm. At the first set point of  
11 MAES-I study (between 19+0 - 21+0 weeks of gestation), eligible women who agreed  
12 to participate will start using the wrist bracelet device on the non-dominant arm  
13 during day and night (24h/day) uninterruptedly until childbirth (including bathing or  
14 aquatic activities). The acquisition of actigraphy data can be performed in different  
15 frequencies (from 10Hz to 100Hz). Since the frequency of data acquisition impacts on  
16 the battery life of the device (inverse relationship), the measurement frequency will be  
17 set up according to the participant's gestational age (Table 3). This information will be  
18 registered in the database accordingly. The data accumulated will be downloaded  
19 during participant's antenatal care visits, according to the maximum return periods  
20 showed in Table 3. The maximum return periods were calculated taking into  
21 consideration the expected battery life.  
22  
23  
24  
25  
26  
27  
28  
29  
30  
31  
32

33 A leaflet with detailed information and FAQ (Frequently asked questions) on the device  
34 will also be provided to the women. They will also have a cell phone number to call  
35 whether doubts arise regarding the procedures for using the device, or if any technical  
36 or medical concern arises.  
37  
38  
39

40 All actigraphy data collected will be entered into proper software to interpret data and  
41 generate an output file. Then, the actigraphy data will be uploaded to an online  
42 database platform developed by MedSciNet®, where all clinical data of the study will  
43 also be registered. The actigraphy software uses several algorithms to estimate  
44 physical activity and sleep patterns. The database is centralized, secure, internet-  
45 based and allows several procedures for prospective and retrospective monitoring,  
46 hierarchical access (local user, general manager, etc.). The database will be translated  
47 into Portuguese and English, facilitating data collection for Portuguese-speaking team  
48 and international monitoring. A correspondent paper form will be available for data  
49 collection if necessary (e.g. internet connection failure for instance).  
50  
51  
52  
53  
54  
55  
56  
57  
58  
59  
60

### *Decision to start monitoring PA and sleep patterns between 19-21weeks*

There are various underlying mechanisms involved in the development of the maternal and perinatal adverse outcomes that will be assessed, as preterm birth, preeclampsia, gestational diabetes, fetal growth restriction and small for gestational age. The pre-clinical phase, stage where there are no clinical signs or symptoms, might be different for each disease and dependent on environmental and individual aspects. The study of adverse maternal and perinatal predictors has been focused in early pregnancy so far (first trimester), aiming to maximize the window of opportunity for preventative interventions. However, we hypothesized that the modification of PA and/or sleep pattern due to maternal underlying changes of biological function might not be evident at a very early stage in pregnancy before the beginning of the pre-clinical phase. Our hypothesis is that it possibly occurs shortly before symptoms.

Additionally, to establish the period between 19-21 weeks as appropriate to start the assessment of PA and sleep patterns taking into consideration that the prevalence of the main maternal complications, as preeclampsia, fetal growth restriction, and preterm birth, are more common in late pregnancy. A recent cross-sectional study conducted in 20 referral centres in Brazil, including the five participating centres of this proposal, showed that the occurrence of preterm birth before 28 weeks comprised less than 1% of all births and less than 8% of all preterm births [44]. In addition, the early onset of preeclampsia (before 34 weeks of gestation) complicates less than 0.4% of all pregnancies, according to a large retrospective cohort of more than 450,000 deliveries in USA [45]. Figure 2 outlines the predicted prevalence of preterm birth and preeclampsia in the second trimester, highlighting its clinical presentation through pregnancy in red. Our hypothesis is that PA and sleep patterns might be altered closely to the clinical presentation, still in preclinical phase. Thus, the start of assessment between 19-21 weeks seems to be very reasonable, providing a wide interval to monitor and predict the main maternal and perinatal adverse outcomes.

### *Actigraph device*

The actigraph device that will be used to monitor PA and sleep-wake patterns is GENEActiv Original (GENEActiv, Activinsights Ltd, Huntingdon, UK). The device has multiple sensors as microelectromechanical (MEMS) accelerometer, temperature

1  
2  
3 (linear active thermistor) and light (silicon photodiode), providing crude raw data for a  
4 variety of applications.  
5

#### 6 *Wrist vs waist wear: advantages and performance*

7  
8 Wrist wear of actigraph devices provides more comfortable use during wake and sleep  
9 periods and highest wear time compared to waist monitors [33,46]. A non-systematic  
10 review published in 2011 showed that actigraphy is a useful and reliable tool to assess  
11 sleep patterns and circadian rhythm disorders, although there are some limitations on  
12 diagnosing sleep diseases or measuring sleep stages [25]. Actigraphy showed excellent  
13 concordance with polysomnography in assessing sleep parameters in healthy subjects  
14 (sensitivity >90% in estimating total sleep time, for instance). A recent study evaluated  
15 the concordance of physical activity estimation of wrist device in free-living settings in  
16 forty overweight or obese women [34]. They used both wrist and hip devices, and a  
17 small camera that captured participant behaviour for 7 days, enabling the monitoring  
18 of physical activity behaviour (gold-standard comparison). The hip and wrist machine  
19 learning (ML) classifiers used are different due to the different methods/algorithms to  
20 estimate physical activity [34]. The sensitivity and specificity of hip and wrist  
21 estimations according to Ellis *et al* are showed in Table 4 [34].  
22  
23  
24  
25  
26  
27  
28  
29  
30  
31  
32

33 Two years ago, the same author had published a similar evaluation using 40 adults  
34 (women and men), showing that the hip and wrist accelerometers obtained an average  
35 accuracy of 92.3% and 87.5%, respectively, in predicting PA types [47].  
36  
37

38  
39 Staudenmayer *et al* developed an investigation with 20 participants also using two  
40 devices (wrist- and hip- worn), and showed that wrist actigraphy can estimate energy  
41 expenditure accurately and relatively precisely [48]. Another study evaluating PA  
42 patterns in a free-living environment with wrist devices showed that women in the top  
43 40% or bottom 40% of the distribution of daily PA, hip and wrist accelerometers  
44 agreed on the classification for about 75% of the women [49]. Additionally, the total  
45 activity (counts per day) was moderately correlated (Spearman's  $r = 0.73$ ) between the  
46 wrist and hip worn devices.  
47  
48  
49  
50  
51

52  
53 At the best of our knowledge, there are no systematic reviews or other high-quality  
54 evidence-based recommendation supporting a particular method. Although wrist wear  
55 of actigraphy is more conventional and accurate, it might not be the best choice for  
56  
57  
58

1  
2  
3 assessing long periods of PA or sleep patterns, even more considering the similar  
4 performance of the wrist wear. The current proposal does not intend to diagnose  
5 pathologic behaviours or diseases, but to identify different patterns along pregnancy  
6 and in different subgroups of women. Therefore, supported by the evidence that wrist  
7 wear of actigraphy devices can accurately and more comfortably estimate PA and  
8 sleep patterns, mainly for long periods and in the free-living environment, the MAES-I  
9 study group adopted wrist wear devices.  
10  
11  
12  
13  
14

### 15 **Main variables**

16  
17 The independent variables assessed as potential predictors of maternal complications  
18 will be related to sleep-wake cycle and mobility as:  
19  
20

#### 21 *“Sleep” variables*

- 22 - Sleep onset latency (SOT): time elapsed between full wakefulness to sleep.
- 23 - Total sleep time (TST): The amount of actual sleep time in a sleep episode  
24 (excludes awakes).
- 25 - Wake after sleep onset (WASO): defined as total amount of time awake after sleep.
- 26 - Sleep Efficiency (SE): the proportion of sleep in the period potentially filled by  
27 sleep-ratio of total sleep time to time in bed.  
28  
29  
30  
31  
32  
33

34 The actigraph device collects many pieces of information related to body position and  
35 body movements to estimate the described sleep variables. Then, actigraphy software  
36 will be used to analyse the data and generates the output variables.  
37  
38  
39

#### 40 *“Physical activity” variables*

41  
42 Actigraphy technology estimates physical activity through various parameters  
43 collected by the actigraph device. Briefly, according to Freedson *et al*, the triaxial  
44 sensors stressed by acceleration forces can estimate the intensity of movements. The  
45 acceleration signal is converted to digital signal and summed over a user specified  
46 time interval (epoch). At the end of each epoch the activity count is stored. Then,  
47 according to Count per minute (CPM) cut points, the PA intensity can be categorized  
48 [50]. The information is translated by the software using proper algorithms into  
49 quantitative variables as following:  
50  
51  
52  
53  
54  
55  
56  
57  
58  
59  
60

- 1
- 2
- 3 - Sedentary time (hours/day): the number of hours per day of count per minute
- 4 between 0-99.
- 5
- 6
- 7 - Light activity (hours/day): the number of hours per day having count per minute
- 8 between 100 - 1951.
- 9
- 10
- 11 - Moderate activity (minutes/day): the number of hours per day having count per
- 12 minute between 1952 - 5724.
- 13
- 14
- 15 - Vigorous activity (minutes/day): the number of hours per day having count per
- 16 minute between 5725 - 9498.
- 17
- 18
- 19 - Very vigorous activity (minutes/day): the number of hours per day having count
- 20 per minute between 9499 -  $\infty$ .
- 21
- 22
- 23 - MET rates: Metabolic Equivalent (METs) are commonly used to also express
- 24 the intensity of physical activities. One MET is the energy cost of resting quietly,
- 25 often defined in terms of oxygen uptake as  $3.5 \text{ mL}\cdot\text{kg}^{-1}\cdot\text{min}^{-1}$ . MET rate
- 26 expresses a person's working metabolic rate relative to their resting metabolic
- 27 rate. Briefly, the triaxial piezoelectric sensors stressed by acceleration forces can
- 28 estimate the intensity of movements, converted to the oxygen consumption
- 29 required to perform such movement.
- 30
- 31
- 32
- 33
- 34
- 35 - Step counts/day: estimated steps count per day.
- 36

### 37 *Outcomes*

38  
39 The primary outcomes are late pregnancy complications as:

- 40
- 41 - Preeclampsia: Hypertension after 20 weeks of gestation, systolic BP  $\geq 140\text{mmHg}$
- 42 and/or diastolic BP  $\geq 90\text{mmHg}$  (Korotkoff V) on at least 2 occasions 4h apart with:
- 43 1) Proteinuria 300 mg/24h or spot urine protein: creatinine ratio  $30 \text{ mg}/\text{mmol}$
- 44 creatinine or urine dipstick protein  $\geq (+)$  OR, in the absence of proteinuria,
- 45 hypertension and 2) any multi-system complication that are: Haematological
- 46 abnormalities; thrombocytopenia (platelets  $< 100 \times 10^9/\text{L}$ ); disseminated
- 47 intravascular coagulation (DIC), and haemolysis; Liver disease: increased
- 48 aspartate transaminase and/or alanine transaminase  $> 45 \text{ IU}/\text{L}$  and/or severe
- 49 right upper quadrant or epigastric pain, liver rupture; Neurological problems:
- 50
- 51
- 52
- 53
- 54
- 55
- 56
- 57
- 58
- 59
- 60

eclampsia, imminent eclampsia (severe headache with hyperreflexia and persistent visual disturbance), cerebral haemorrhage; Acute renal insufficiency: new increase in serum creatinine to > 100 mmol/L antepartum or > 130 mmol/L postpartum; Pulmonary oedema confirmed by chest x-ray [51].

- Gestational Diabetes: new diabetes developing in pregnancy according to the WHO recommendation [52] that defines gestational diabetes as having:
  - o Fasting plasma glucose  $\geq$  92 mg/dl, or
  - o 1-h plasma glucose tolerance test (75g load)  $\geq$  180 mg/dl, or
  - o 2-h plasma glucose tolerance test (75g load)  $\geq$  153 mg/dl.
- Spontaneous Preterm Birth: spontaneous onset of preterm labour or premature rupture of membranes leading to preterm birth, childbirth before 37 weeks of gestation.
- Provider-Initiated Preterm Birth: defined as childbirth occurring at less than 37 weeks, medically indicated due to maternal/fetal compromise or both;
- Maternal Hemorrhage: Classified in 1) Antepartum haemorrhage defined as bleeding from the genital tract after 24 weeks of gestation; 2) Primary Postpartum haemorrhage as the loss of 500 ml blood or more from the genital tract within 24 hours of the childbirth.

Secondary outcomes include childbirth variables and neonatal adverse outcomes as fetal death, caesarean section, small for gestational age (defined as birth weight below percentile 10 for gestational age), Apgar score < 7 at 5 minutes, neonatal severe morbidity (Table 5) and neonatal mortality before discharge.

### ***Plans for analyses***

#### *Sample size estimation*

This is an exploratory and innovative study focused on a specific population (pregnant women) and therefore there are no previously published parameters available for sample size estimation. Considering a relatively wide range of frequency of complications arising in pregnancy from 3 to 20% (including preeclampsia, fetal growth restriction, gestational diabetes, hemorrhage, preterm birth, etc.), a theoretical large population size (above 1 million pregnant women), an acceptable margin of error of 4%, the involvement of 5 clusters (participating centers) and a 95% level of confidence,



1  
2  
3 384 women would be necessary. Therefore, we are rounding up this estimation for at  
4 least 400 initially low-risk pregnant women to be enrolled in the study. We estimated  
5 the incidence of some main maternal complications considering the following studies:  
6  
7

- 8 - Pre-eclampsia: An international prospective cohort study with nulliparous women  
9 called SCOPE used similar criteria for the low-risk profile, having 5% of incidence of  
10 pre-eclampsia [53].
- 11 - Preterm Birth: A recent cross-sectional study conducted in 20 referral obstetric  
12 centres in Brazil, including the five participant centres of this proposal, showed a  
13 prevalence of 12.3% of all births [44].
- 14 - Gestational Diabetes: SCOPE international cohort, previously mentioned, had a  
15 prevalence of 8.9% of gestational diabetes in low-risk screened nulliparous women,  
16 according to mainly to the NICE guidelines [54].
- 17 - Fetal growth restriction/small for gestational age: SCOPE international cohort,  
18 previously mentioned, had a prevalence of 10.7% of newborns small for gestational  
19 age, according to the customized centiles of birthweight (<10%)[55].  
20  
21  
22  
23  
24  
25  
26  
27  
28

### 29 *Analyzes and statistics details*

30  
31 According to these studies, the predicted incidence of these complications, the leading  
32 causes of maternal and perinatal adverse outcomes, seems adequate for the current  
33 proposal and sample size estimation, although the complications are not cumulative.  
34  
35

36  
37 Firstly, we will identify PA and sleep-wake patterns of women who did not develop  
38 adverse maternal or perinatal outcomes. It will permit the recognition of a normal PA  
39 and sleep-wake patterns in low-risk population without complication during  
40 pregnancy. Using the same population, we will analyze changes in PA and sleep-wake  
41 patterns through pregnancy, allowing for gestational age periods.  
42  
43  
44

45  
46 Then, we will compare the PA and sleep-wake patterns of women who developed  
47 specific adverse maternal or perinatal outcomes with those who did not. The  
48 differences between groups might be identified to be used as potential markers for  
49 specific pregnancy complications.  
50  
51  
52

53  
54 After that, we will analyze changes in PA and sleep-wake patterns of women who  
55 developed adverse maternal or perinatal outcomes through pregnancy, comparing the  
56  
57

1  
2  
3 patterns before with those after the onset of maternal complications, trying to  
4 discover which changes might be related to pregnancy complications.  
5

6  
7 Finally, we will develop a predictive model for screening pregnant women for risk of  
8 specific adverse maternal and perinatal outcomes using PA and sleep-wake data  
9 estimated with actigraphy technology.  
10

11  
12 The analysis will be performed using the actigraph software that translates the  
13 collected information into PA and sleep-wake parameters. Additionally, Friedman and  
14 Wilcoxon for paired samples, t-test, and ANOVA for repeated measures will be applied  
15 to achieve statistical analyses.  
16  
17  
18

### 19 ***Discontinuation of participants***

20  
21 The criteria for discontinuation include:  
22

- 23 - Withdrawal of consent;
- 24 - Not regularly using the actigraph device for long periods, above 50% of all planned  
25 time. The information that they are not using the device properly will be recorded  
26 if women notice the MAES-I team. Otherwise, the low use of the device will be  
27 noticed after data discharge during antenatal care visits.  
28  
29  
30  
31 - The loss to follow-up, not allowing the download of actigraphy data.  
32  
33  
34

### 35 ***Data and Sample Quality***

36  
37 All entered data will be prospectively and retrospectively monitored by local research  
38 assistants and a global monitor. Internal consistency of variables will be constantly  
39 performed by the database and error messages are automatically flagged. A local  
40 research assistant will be responsible for checking all forms and actigraphy data before  
41 locking forms, assuring good quality of data. Then, the local principal investigator (PI)  
42 will be responsible for signing the case, enabling its incorporation to the final database.  
43  
44 The University of Campinas will coordinate, implement and monitor the study in the  
45 five participating centres. A general manager and a global monitor are also part of the  
46 team of the coordinating centre. The local team of each participating centre is  
47 comprised of a Local PI and research assistants.  
48  
49  
50  
51  
52  
53

### 54 ***Ethical aspects***

1  
2  
3 MAES-I study focuses on low-risk nulliparous Brazilian pregnant women. Despite being  
4 considered of low risk for maternal and perinatal complications, they are not free of  
5 suffering complications. Furthermore, the first and second delays, defined as a delay in  
6 deciding to seek care and delay in reaching a health care facility [56], are not  
7 uncommon, establishing a barrier between early recognition of symptoms and timely  
8 interventions capable to successfully treat potentially life-threatening conditions. We  
9 believe that women will feel encouraged, empowered and willing to participate in the  
10 study that aims to develop a potentially useful prenatal care tool to identify the risk for  
11 maternal and perinatal morbidity and mortality. Following national ethical regulations,  
12 the participants will not receive any financial compensation.  
13  
14  
15  
16  
17  
18  
19

20 Women who agree to participate in the study will not have any disadvantages or injury  
21 of their prenatal care. On the contrary, they will receive a telephone number to  
22 contact the clinical researchers at any time (24/7 service), which enables a closer  
23 contact with researchers and providers of care, since the MAES-I team are committed  
24 to contacting providers of care if any potential complication is noticed by participants.  
25  
26  
27  
28

29 The participating women will not be responsible if loss, theft or damage to the wrist  
30 device occurs. However, they will be asked to return the device after they finished the  
31 participation in the study, in order to use it for new women entering the study. No self-  
32 damage is expected in those who use the device. The identity of all women will be kept  
33 confidential.  
34  
35  
36  
37

38 Participating women will not be able to identify any PA or sleep parameters at any  
39 stage of the study. The download of the data is only possible through the own licensed  
40 software of the device.  
41  
42  
43

44 MAES-I study has been reviewed and approved by the National Committee for Ethics in  
45 Research of Brazil (CONEP) and by the Institutional Review Board (IRB) of the  
46 coordinating centre (Letter of approval 1.834.116 issued on 24<sup>th</sup> November 2016) and  
47 of all other Brazilian participating centres. All women who will be enrolled in the  
48 MAES-I cohort will sign an informed consent form.  
49  
50  
51  
52

53 The ethical principles stated in the Brazilian National Health Council (Resolution CNS  
54 466/12) will be respected in every stage of this study. The anonymity of the source of  
55  
56  
57  
58

1  
2  
3 information will be guaranteed and the care for the women will be provided  
4 independently of her agreement to participate in the study. The study also complies  
5 with the Declaration of Helsinki amended in Hong Kong in 1989. The methodological  
6 and ethical aspects of MAES-I study protocol were developed following STROBE  
7 guidelines [57].  
8  
9

### 10 11 *Patient and Public Involvement*

12  
13  
14 Patients and public were not involved in this study for the development of the  
15 research question and outcome measures. However, the choice for a wrist device was  
16 based on the preference of users as reported. Participants of the study will have access  
17 to the results by its webpage that will open access.  
18  
19  
20  
21  
22

## 23 **Discussion**

24  
25  
26 The actigraphy is an innovative, non-invasive, non-operator dependent, wearable  
27 technology, which enables the estimative under real life conditions of diverse variables  
28 related to mobility, physical activity, sleep-wake, and circadian cycle patterns.  
29 Actigraph devices show high sensitivity in sleep-wake parameters detection and are  
30 currently highly recommended by the American Sleep Disorder Association for  
31 diagnosis and therapy response of circadian rhythm disorders [27,28,58]. Although  
32 some studies show that 7 to 14 days using the actigraph device provides reliable  
33 estimates of physical activity behavior in older adult, it is not absolutely clear how  
34 many days is needed to estimate habitual PA by using the wrist/waist device during  
35 pregnancy. In general, it seems to depend mainly on the type of actigraph device,  
36 position of wear and target population [30,33]. Nevertheless, MAES-I study will  
37 provide sufficient data to assess different patterns along pregnancy.  
38  
39  
40  
41  
42  
43  
44  
45  
46

47 The use of wearable physical activity monitors has grown enormously due to the  
48 interest about the relationship between the pathophysiology of diseases and physical  
49 activity and sleep patterns. A recent study on the use of physical activity monitors in  
50 human physiology research unravels the current and potential uses of actigraph device  
51 as in strategies to promote healthier behaviour or to predict outcomes [59]. The  
52 authors conclude that physical activity monitors, as others new 21<sup>st</sup> century  
53  
54  
55  
56  
57  
58  
59  
60

1  
2  
3 technologies, have already transformed physiology research, revolutionizing the way  
4 we assess patients and opening new areas of interest. In addition, the use of objective  
5 measures to evaluate habitual sleep duration and outcomes in pregnancy is critical,  
6 taking into account recent investigations reporting little agreement between objective  
7 and subjective assessments of sleep time [60].  
8  
9

10  
11 Alterations in sleep patterns, as less deep sleep and more nocturnal awakenings, can  
12 be observed in pregnancy as early as 10-12 weeks gestation [61]. Sleep disturbances  
13 during pregnancy have been associated with preterm delivery, gestational  
14 hypertensive disorders, glucose intolerance and increased risk of caesarean delivery  
15 [24]. Shorter night time sleep was also associated with hyperglycemia [60]. Persistent  
16 sleep deficiency is correlated with depressive symptoms and stress perception by  
17 pregnant women [61]. These studies lay correlation between PA patterns and sleep  
18 disturbances determining complications, in a well-established relationship of cause and  
19 consequence, although sometimes it could not be adequately determined due to the  
20 study design [17].  
21  
22

23  
24 In a distinct way, our analysis intends to figure out if the maternal complication could  
25 be identified by physical activity and/or sleep patterns modifications, even during its  
26 pre-clinical period, previous the appearance of clinical signs. Considering the existing  
27 evidence, we speculate that the PA and/or sleep patterns change days or weeks before  
28 the clinical presentation of the complication. In general, the signs and symptoms of  
29 some maternal outcomes are part of the gold-standard criteria for diagnosis (high  
30 blood pressure, proteinuria and/or edema in the case of preeclampsia; premature  
31 contractions and cervical ripening/dilation in preterm birth; abnormal placental blood  
32 flow and insufficient fetal growth in Intrauterine Growth Restriction).  
33  
34

35  
36 Then, the use of actigraph device during prenatal visits has a potential to become a  
37 new tool to monitor pregnant women, improving maternal health care, identifying  
38 altered PA and/or sleep patterns, measured objectively through actigraphy, before the  
39 occurrence of those signs and symptoms. Therefore, the focus would be offering new  
40 technology to monitor the development of a potential maternal complication. Other  
41 positive points of our study are the period of data collection (from 19 weeks till  
42 delivery) and the low-risk profile of the cohort. Through which, it would be possible to  
43  
44  
45  
46  
47  
48  
49  
50  
51  
52  
53  
54  
55  
56  
57  
58  
59  
60

1  
2  
3 describe a PA and sleep patterns in a low-risk pregnant population and better interpret  
4 actigraphy data among pregnant women. The current clinical and biological predictors  
5 for the main maternal complications as preeclampsia, preterm birth, maternal  
6 haemorrhage, and gestational diabetes still lack for effective sensitivity and specificity.  
7  
8

9  
10 If this is confirmed to be true, an important step will be achieved for a possible  
11 introduction of screening non-invasive procedures during prenatal care with the  
12 purpose of identifying women at higher risk of developing those conditions. Therefore,  
13 they could receive specific orientation on prevention and earlier detection of the onset  
14 of condition for taking immediate action to look for professional health care and  
15 receiving appropriate interventions, avoiding delays that are the most striking factor  
16 for the low quality of care the women usually receive in low and middle-income  
17 settings, contributing to the still high burden of maternal morbidity and mortality. If  
18 we were successful in identifying such “specific patterns of physical activity and sleep”  
19 as predictors for pregnancy complications, further validation studies will necessarily be  
20 recommended for assessing its effectiveness for the whole management of such  
21 conditions. Additionally, MAES-I will enable further specific studies among high risk  
22 population and also will help to identify the best gestational age for monitoring, giving  
23 the means to target a specific gestational age interval.  
24  
25  
26  
27  
28  
29  
30  
31  
32  
33  
34  
35  
36  
37  
38  
39  
40  
41  
42  
43  
44  
45  
46  
47  
48  
49  
50  
51  
52  
53  
54  
55  
56  
57  
58  
59  
60

## Abbreviations

|                                                  |                                                          |
|--------------------------------------------------|----------------------------------------------------------|
| ANC – antenatal care                             | min – minutes                                            |
| BMI – body mass index                            | mg – milligram                                           |
| BP – blood pressure                              | mL – millilitre                                          |
| CPM – count per minute                           | mmol – millimole                                         |
| dL – decilitre                                   | NICE – National Institute for Health and Care Excellence |
| FAQ – frequently asked questions                 | PA – physical activity                                   |
| h – hour                                         | PI – Principal investigator                              |
| HDI – human development index                    | SE – sleep efficiency                                    |
| Hz - hertz                                       | SCOPE – SCreening Of Pregnancy Endponits                 |
| Kg – kilogram                                    | SOL – sleep onset latency                                |
| L – litre                                        | TST – total nocturnal sleep time                         |
| MAES-I – maternal Actigraphy Exploratory Study I | US – United States                                       |
| MEMS – microelectromechanical                    | USA – United States of America                           |
| MET – metabolic equivalents                      | w – week                                                 |

## Competing interests

The authors declare that they have no competing interests.

## Authors' contributions

All authors contributed to the overall study design and specific methodologies. RTS, JGC, JM, MLC and JPS conceived the study design. RTS, JGC, JM, and RBG planned the implementation of the study. RTS, JM, MLC and JGC drafted the manuscript. All authors discussed and made important contributions to the manuscript, read and approved the final version for submission.

## Acknowledgements

The MAES - I study group also included: Carina B Luiz and Luiza C Brust, School of Medicine, Federal University of Rio Grande do Sul, Porto Alegre, Brazil; Danilo Anacleto and Livia C Nascimento, School of Medicine, Federal University of Pernambuco, Recife, Brazil; Daisy Lucena and Denise Ellen F Cordeiro, School of Medicine, Federal University of Ceará, Fortaleza, Brazil; Mariana B Rogerio, Department of Obstetrics and Gynecology, Jundiaí Medical School, Jundiaí, Brazil.

**Funding**

This study was granted by The Bill and Melinda Gates Foundation through the Grand Challenge Exploration program, call 19 (research grant OPP1182749).

For peer review only



## References

- 1 United Nations Development Programme (UNDP). Sustain. Dev. Goals. 2015.<http://www.un.org/sustainabledevelopment/health/> (accessed 27 Apr 2016).
- 2 WHO, World Health Organization. Global Strategy. Glob. Strateg. Women's, Child. Adolesc. Heal. 2016 - 2030. 2015.<http://www.who.int/life-course/partners/global-strategy/global-strategy-2016-2030/en/> (accessed 9 Jul 2016).
- 3 Pacagnella RC, Cecatti JG, Parpinelli MA, *et al.* Delays in receiving obstetric care and poor maternal outcomes: results from a national multicentre cross-sectional study. *BMC Pregnancy Childbirth* 2014;**14**:159. doi:10.1186/1471-2393-14-159
- 4 Haddad SM, Cecatti JG, Souza JP, *et al.* Applying the maternal near miss approach for the evaluation of quality of obstetric care: a worked example from a Multicenter Surveillance Study. *Biomed Res Int* 2014;**2014**:989815. doi:10.1155/2014/989815
- 5 Pacagnella RC, Cecatti JG, Osis MJ, *et al.* The role of delays in severe maternal morbidity and mortality: expanding the conceptual framework. *Reprod Health Matters* 2012;**20**:155–63. doi:10.1016/S0968-8080(12)39601-8
- 6 Vogel JP, Souza JP, Mori R, *et al.* Maternal complications and perinatal mortality: findings of the World Health Organization Multicountry Survey on Maternal and Newborn Health. *BJOG* 2014;**121** Suppl:76–88. doi:10.1111/1471-0528.12633
- 7 Souza JP, Gülmezoglu AM, Vogel J, *et al.* Moving beyond essential interventions for reduction of maternal mortality (the WHO Multicountry Survey on Maternal and Newborn Health): a cross-sectional study. *Lancet* 2013;**381**:1747–55. doi:10.1016/S0140-6736(13)60686-8
- 8 Brosens I, Pijnenborg R, Vercruyse L, *et al.* The 'Great Obstetrical Syndromes' are associated with disorders of deep placentation. *Am J Obstet Gynecol* 2011;**204**:193–201. doi:10.1016/j.ajog.2010.08.009
- 9 Di Renzo GC. The great obstetrical syndromes. *J Matern neonatal Med* 2009;**22**:633–5. doi:10.1080/14767050902866804
- 10 Loprinzi PD. The effects of objectively-measured, free-living daily ambulatory movement on mortality in a national sample of adults with diabetes. *Physiol Behav* 2016;**154**:126–8. doi:10.1016/j.physbeh.2015.11.022
- 11 Biswas A, Oh PI, Faulkner GE, *et al.* Sedentary Time and Its Association With Risk for Disease Incidence, Mortality, and Hospitalization in Adults. *Ann Intern Med* 2015;**162**:123. doi:10.7326/M14-1651
- 12 Hardin PE. From biological clock to biological rhythms. *Genome Biol* 2000;**1**:reviews1023.1-1023.5. doi:10.1186/gb-2000-1-4-reviews1023
- 13 Kizaki T, Sato S, Shirato K, *et al.* Effect of Circadian Rhythm on Clinical and Pathophysiological Conditions and Inflammation. *Crit Rev Immunol* 2015;**35**:261–75.
- 14 Baron KG, Reid KJ. Circadian misalignment and health. *Int Rev Psychiatry* 2014;**26**:139–54.

- 1  
2  
3 15 Leproult R, Holmbäck U, Van Cauter E, *et al.* Circadian misalignment augments  
4 markers of insulin resistance and inflammation, independently of sleep loss.  
5 *Diabetes* 2014;**63**:1860–9. doi:10.2337/db13-1546
- 6  
7 16 Diem SJ, Blackwell TL, Stone KL, *et al.* Measures of Sleep-Wake Patterns and  
8 Risk of Mild Cognitive Impairment or Dementia in Older Women. *Am J Geriatr*  
9 *Psychiatry* 2016;**24**:248–58. doi:10.1016/j.jagp.2015.12.002
- 10  
11 17 Haney A, Buysse DJ, Rosario BL, *et al.* Sleep disturbance and cardiometabolic  
12 risk factors in early pregnancy: a preliminary study. *Sleep Med* 2014;**15**:444–50.  
13 doi:10.1016/j.sleep.2014.01.003
- 14  
15 18 Lynch BM, Boyle T, Winkler E, *et al.* Patterns and correlates of accelerometer-  
16 assessed physical activity and sedentary time among colon cancer survivors.  
17 *Cancer Causes Control* 2016;**27**:59–68. doi:10.1007/s10552-015-0683-4
- 18  
19 19 Palagini L, Gemignani A, Banti S, *et al.* Chronic sleep loss during pregnancy as a  
20 determinant of stress: impact on pregnancy outcome. *Sleep Med* 2014;**15**:853–9.  
21 doi:10.1016/j.sleep.2014.02.013
- 22  
23 20 Tsai S-Y, Lin J-W, Wu W-W, *et al.* Sleep Disturbances and Symptoms of  
24 Depression and Daytime Sleepiness in Pregnant Women. *Birth* 2016;**43**:176–83.  
25 doi:10.1111/birt.12215
- 26  
27 21 Tsai S-Y, Lee P-L, Lin J-W, *et al.* Cross-sectional and Longitudinal Associations  
28 between Sleep and Health-related Quality of Life in Pregnant Women: a  
29 Prospective Observational Study. *Int J Nurs Stud* 2016;**56**:45–53.  
30 doi:10.1016/j.ijnurstu.2016.01.001
- 31  
32 22 Hayase M, Shimada M, Seki H. Sleep quality and stress in women with  
33 pregnancy-induced hypertension and gestational diabetes mellitus. *Women Birth*  
34 2014;**27**:190–5. doi:10.1016/j.wombi.2014.04.002
- 35  
36 23 Mindell JA, Cook RA, Nikolovski J. Sleep patterns and sleep disturbances across  
37 pregnancy. *Sleep Med* 2015;**16**:483–8. doi:10.1016/j.sleep.2014.12.006
- 38  
39 24 JOHN D, FREEDSON P. ActiGraph and Actical Physical Activity Monitors.  
40 *Med Sci Sport Exerc* 2012;**44**:S86–9. doi:10.1249/MSS.0b013e3182399f5e
- 41  
42 25 Martin JL, Hakim AD. Wrist actigraphy. *Chest* 2011;**139**:1514–27.  
43 doi:10.1378/chest.10-1872
- 44  
45 26 Wood AC, Kuntsi J, Asherson P, *et al.* Actigraph data are reliable, with  
46 functional reliability increasing with aggregation. *Behav Res Methods*  
47 2008;**40**:873–8.
- 48  
49 27 Morgenthaler TI, Lee-Chiong T, Alessi C, *et al.* Practice parameters for the  
50 clinical evaluation and treatment of circadian rhythm sleep disorders. An  
51 American Academy of Sleep Medicine report. *Sleep* 2007;**30**:1445–59.
- 52  
53 28 Sadeh A. The role and validity of actigraphy in sleep medicine: an update. *Sleep*  
54 *Med Rev* 2011;**15**:259–67. doi:10.1016/j.smrv.2010.10.001
- 55  
56 29 Sani M, Refinetti R, Jean-Louis G, *et al.* Daily activity patterns of 2316 men and  
57 women from five countries differing in socioeconomic development. *Chronobiol*  
58 *Int* 2015;**32**:650–6.
- 59  
60 30 Hart TL, Swartz AM, Cashin SE, *et al.* How many days of monitoring predict  
physical activity and sedentary behaviour in older adults? *Int J Behav Nutr Phys*

- 1  
2  
3 *Act* 2011;**8**:62. doi:10.1186/1479-5868-8-62
- 4 31 Falck RS, Landry GJ, Brazendale K, *et al.* Measuring Physical Activity in Older  
5 Adults Using MotionWatch 8© Actigraphy: How Many Days are Needed? *J*  
6 *Aging Phys Act* Published Online First: 7 June 2016. doi:10.1123/japa.2015-0256
- 7  
8 32 Dillon CB, Fitzgerald AP, Kearney PM, *et al.* Number of Days Required to  
9 Estimate Habitual Activity Using Wrist-Worn GENEActiv Accelerometer: A  
10 Cross-Sectional Study. *PLoS One* 2016;**11**:e0109913.  
11 doi:10.1371/journal.pone.0109913
- 12  
13 33 Trost SG, Zheng Y, Wong W-K. Machine learning for activity recognition: hip  
14 versus wrist data. *Physiol Meas* 2014;**35**:2183–9. doi:10.1088/0967-  
15 3334/35/11/2183
- 16  
17 34 Ellis K, Kerr J, Godbole S, *et al.* Hip and Wrist Accelerometer Algorithms for  
18 Free-Living Behavior Classification. *Med Sci Sports Exerc* 2016;**48**:933–40.  
19 doi:10.1249/MSS.0000000000000840
- 20  
21 35 Rowlands A V, Cliff DP, Fairclough SJ, *et al.* Moving Forward with Backward  
22 Compatibility: Translating Wrist Accelerometer Data. *Med Sci Sports Exerc*  
23 Published Online First: 20 June 2016. doi:10.1249/MSS.0000000000001015
- 24  
25 36 Koster A, Shiroma EJ, Caserotti P, *et al.* Comparison of Sedentary Estimates  
26 between activPAL and Hip- and Wrist-Worn ActiGraph. *Med Sci Sports Exerc*  
27 2016;**48**:1514–22. doi:10.1249/MSS.0000000000000924
- 28  
29 37 Haddad SM, Cecatti JG, Parpinelli MA, *et al.* From planning to practice: building  
30 the national network for the Surveillance of Severe Maternal Morbidity. *BMC*  
31 *Public Health* 2011;**11**:283. doi:10.1186/1471-2458-11-283
- 32  
33 38 Fisher M. A revealing map of the world's most and least ethnically diverse  
34 countries. Washint. Post.  
35 2013. [http://www.washingtonpost.com/blogs/worldviews/wp/2013/05/16/a-](http://www.washingtonpost.com/blogs/worldviews/wp/2013/05/16/a-revealing-map-of-the-worlds-most-and-least-ethnically-diverse-countries)  
36 [revealing-map-of-the-worlds-most-and-least-ethnically-diverse-countries.](http://www.washingtonpost.com/blogs/worldviews/wp/2013/05/16/a-revealing-map-of-the-worlds-most-and-least-ethnically-diverse-countries)  
37 (accessed 25 Jul 2016).
- 38  
39 39 United Nations Development Programme (UNDP). Hum. Dev. Index (HDI).  
40 Brazil. 2010. <http://www.pnud.org.br/Atlas.aspx>
- 41  
42 40 Wu J, Sigmund CD. Hypertension: A Disease That Strikes Around the Clock.  
43 *Hypertension* 2016;**67**:493–5. doi:10.1161/HYPERTENSIONAHA.115.06331
- 44  
45 41 Danilack VA, Nunes AP, Phipps MG. Unexpected complications of low-risk  
46 pregnancies in the United States. *Am J Obstet Gynecol* 2015;**212**:809.e1-809.e6.  
47 doi:10.1016/j.ajog.2015.03.038
- 48  
49 42 Luft CDB, Sanches S de O, Mazo GZ, *et al.* [Brazilian version of the Perceived  
50 Stress Scale: translation and validation for the elderly]. *Rev Saude Publica*  
51 2007;**41**:606–15.
- 52  
53 43 Pesce RP, Assis SG, Avanci JQ, *et al.* [Cross-cultural adaptation, reliability and  
54 validity of the resilience scale]. *Cad Saude Publica*; **21**:436–48. doi:/S0102-  
55 311X2005000200010
- 56  
57 44 Passini R, Cecatti JG, Lajos GJ, *et al.* Brazilian Multicentre Study on Preterm  
58 Birth (EMIP): Prevalence and Factors Associated with Spontaneous Preterm  
59 Birth. *PLoS One* 2014;**9**:e109069. doi:10.1371/journal.pone.0109069

- 1  
2  
3 45 Lisonkova S, Joseph KS. Incidence of preeclampsia: risk factors and outcomes  
4 associated with early- versus late-onset disease. *Am J Obstet Gynecol*  
5 2013;**209**:544.e1-544.e12. doi:10.1016/j.ajog.2013.08.019
- 6 46 Belton S, O'Brien W, Wickel EE, *et al.* Patterns of noncompliance in adolescent  
7 field-based accelerometer research. *J Phys Act Health* 2013;**10**:1181–5.
- 8 47 Ellis K, Kerr J, Godbole S, *et al.* A random forest classifier for the prediction of  
9 energy expenditure and type of physical activity from wrist and hip  
10 accelerometers. *Physiol Meas* 2014;**35**:2191–203. doi:10.1088/0967-  
11 3334/35/11/2191
- 12 48 Staudenmayer J, He S, Hickey A, *et al.* Methods to estimate aspects of physical  
13 activity and sedentary behavior from high-frequency wrist accelerometer  
14 measurements. *J Appl Physiol* 2015;**119**.
- 15 49 Kamada M, Shiroma EJ, Harris TB, *et al.* Comparison of physical activity  
16 assessed using hip- and wrist-worn accelerometers. *Gait Posture* 2016;**44**:23–8.  
17 doi:10.1016/j.gaitpost.2015.11.005
- 18 50 Freedson PS, Melanson E, Sirard J. Calibration of the Computer Science and  
19 Applications, Inc. accelerometer. *Med Sci Sports Exerc* 1998;**30**:777–81.
- 20 51 Tranquilli AL, Dekker G, Magee L, *et al.* The classification, diagnosis and  
21 management of the hypertensive disorders of pregnancy: A revised statement  
22 from the ISSHP. *Pregnancy Hypertens* 2014;**4**:97–104.  
23 doi:10.1016/j.preghy.2014.02.001
- 24 52 WHO recommendations on antenatal care for a positive pregnancy experience.  
25 World Health Organization.  
26 2016.[http://www.who.int/reproductivehealth/publications/maternal\\_perinatal\\_hea](http://www.who.int/reproductivehealth/publications/maternal_perinatal_health/anc-positive-pregnancy-experience/en/)  
27 [lth/anc-positive-pregnancy-experience/en/](http://www.who.int/reproductivehealth/publications/maternal_perinatal_health/anc-positive-pregnancy-experience/en/)
- 28 53 North RA, McCowan LME, Dekker GA, *et al.* Clinical risk prediction for pre-  
29 eclampsia in nulliparous women: development of model in international  
30 prospective cohort. *BMJ* 2011;**342**:d1875.
- 31 54 Murphy NM, McCarthy FP, Khashan AS, *et al.* Compliance with National  
32 Institute of Health and Care Excellence risk-based screening for Gestational  
33 Diabetes Mellitus in nulliparous women. *Eur J Obstet Gynecol Reprod Biol*  
34 2016;**199**:60–5. doi:10.1016/j.ejogrb.2016.01.044
- 35 55 McCowan LME, Roberts CT, Dekker GA, *et al.* Risk factors for small-for-  
36 gestational-age infants by customised birthweight centiles: data from an  
37 international prospective cohort study. *BJOG* 2010;**117**:1599–607.  
38 doi:10.1111/j.1471-0528.2010.02737.x
- 39 56 Thaddeus S, Maine D. Too far to walk: maternal mortality in context. *Soc Sci*  
40 *Med* 1994;**38**:1091–110.
- 41 57 von Elm E, Altman DG, Egger M, *et al.* The Strengthening the Reporting of  
42 Observational Studies in Epidemiology (STROBE) statement: guidelines for  
43 reporting observational studies. *PLoS Med* 2007;**4**:e296.  
44 doi:10.1371/journal.pmed.0040296
- 45 58 Huberty J, Ehlers DK, Kurka J, *et al.* Feasibility of three wearable sensors for 24  
46 hour monitoring in middle-aged women. *BMC Womens Health* 2015;**15**:55.  
47 doi:10.1186/s12905-015-0212-3

- 1  
2  
3 59 Wright SP, Hall Brown TS, Collier SR, *et al.* How consumer physical activity  
4 monitors could transform human physiology research. *Am J Physiol Regul Integr*  
5 *Comp Physiol* 2017;:ajpregu.00349.2016. doi:10.1152/ajpregu.00349.2016  
6  
7 60 Herring SJ, Foster GD, Pien GW, *et al.* Do pregnant women accurately report  
8 sleep time? A comparison between self-reported and objective measures of sleep  
9 duration in pregnancy among a sample of urban mothers. *Sleep Breath*  
10 2013;**17**:1323–7. doi:10.1007/s11325-013-0835-2  
11  
12 61 Okun ML, Kline CE, Roberts JM, *et al.* Prevalence of sleep deficiency in early  
13 gestation and its associations with stress and depressive symptoms. *J women's*  
14 *Heal* 2013;**22**:1028–37. doi:10.1089/jwh.2013.4331  
15  
16 62 Tsai S-Y, Lee P-L, Lin J-W, *et al.* Cross-sectional and longitudinal associations  
17 between sleep and health-related quality of life in pregnant women: A  
18 prospective observational study. *Int J Nurs Stud* 2016;**56**:45–53.  
19 doi:10.1016/j.ijnurstu.2016.01.001  
20  
21 63 Herring SJ, Nelson DB, Pien GW, *et al.* Objectively measured sleep duration and  
22 hyperglycemia in pregnancy. *Sleep Med* 2014;**15**:51–5.  
23 doi:10.1016/j.sleep.2013.07.018  
24  
25  
26  
27  
28  
29  
30  
31  
32  
33  
34  
35  
36  
37  
38  
39  
40  
41  
42  
43  
44  
45  
46  
47  
48  
49  
50  
51  
52  
53  
54  
55  
56  
57  
58  
59  
60

**Table 1.** Participating centers in the Maternal Actigraphy Exploratory Study I (MAES-I)

|                                                                                                                                                                                                                                                           |
|-----------------------------------------------------------------------------------------------------------------------------------------------------------------------------------------------------------------------------------------------------------|
| <ul style="list-style-type: none"><li>• The Maternity of CAISM, University of Campinas, in Campinas, SP, Brazil;<ul style="list-style-type: none"><li>○ Local Principal Investigator: Maria Laura Costa.</li></ul></li></ul>                              |
| <ul style="list-style-type: none"><li>• Maternity of the Clinic Hospital, Federal University of RS, Porto Alegre, RS, Brazil;<ul style="list-style-type: none"><li>○ Local Principal Investigator: Janete Vettorazzi.</li></ul></li></ul>                 |
| <ul style="list-style-type: none"><li>• Maternity of the University Hospital, Jundiaí Medical School in Jundiaí, SP, Brazil;<ul style="list-style-type: none"><li>○ Local Principal Investigator: Ricardo Porto Tedesco.</li></ul></li></ul>              |
| <ul style="list-style-type: none"><li>• Maternity of Clinic Hospital, Federal University of Pernambuco, in Recife, PE, Brazil;<ul style="list-style-type: none"><li>○ Local Principal Investigator: Edilberto A Rocha Filho.</li></ul></li></ul>          |
| <ul style="list-style-type: none"><li>• MEAC – School Maternity of the Federal University of Ceará, in Fortaleza, CE, Brazil.<ul style="list-style-type: none"><li>○ Local Principal Investigator: Francisco Edson de Lucena Feitosa.</li></ul></li></ul> |

**Table 2.** Inclusion and Exclusion Criteria of MAES – I**Inclusion Criteria**

- Singleton pregnancy
- Nulliparous (no previous delivery  $\geq$  20weeks)
- Between 4+0 – 21+0 weeks of gestation

**Exclusion Criteria**

- |                                                                                                                       |                                                      |
|-----------------------------------------------------------------------------------------------------------------------|------------------------------------------------------|
| • Unsure LMP and unwilling to have to date the Ultrasound                                                             | • Major Uterine Anomaly                              |
| • $\geq$ 3 Miscarriages                                                                                               | • Cervical Suture                                    |
| • Major Fetal Anomaly/Abnormal Karyotype*                                                                             | • Knife cone biopsy                                  |
| • Essential Hypertension Treated Pre-pregnancy                                                                        | • Ruptured membranes                                 |
| • Mod-Severe Hypertension at booking ( $\geq$ 160/100 mmHg) or Chronic hypertension using antihypertensive medication | • Use of long-term steroids                          |
| • Pre-pregnancy Diabetes                                                                                              | • Use of Low-dose Aspirin                            |
| • Renal Disease                                                                                                       | • Use of Calcium (> 1g/24h)                          |
| • Systemic Lupus Erythematosus                                                                                        | • Use of Eicosapentaenoic acid (fish oil) > 2,7g     |
| • Anti-phospholipid Syndrome                                                                                          | • Use of Vit. C $\geq$ 1000mg & Vit. E $\geq$ 400 UI |
| • Sickle Cell Disease                                                                                                 | • Use of Heparin/LMW Heparin                         |
| • HIV or Hep B or Hep C positive                                                                                      | • Untreated Thyroid disease                          |
| • Any condition that limits practice of physical activity                                                             | • Use of antidepressant and/or anxiolytic agents     |

\* All information regarding fetal anomalies will be properly recorded

**Table 3.** Measurement frequency and maximum return periods according to gestational age – MAES I

| Gestational age | Measurement frequency | Maximum return period (weeks) |
|-----------------|-----------------------|-------------------------------|
| 19 – 32 weeks   | 20Hz                  | 4                             |
| 33 – 36 weeks   | 30Hz                  | 2                             |
| 37 – 42 weeks   | 50Hz                  | 1                             |



**Table 4.** Performance of wrist and hip actigraphy methods according to different activities

|                 | Hip   |       |       | Wrist |       |       |
|-----------------|-------|-------|-------|-------|-------|-------|
|                 | Sens  | Spec  | BA    | Sens  | Spec  | BA    |
| Sitting         | 0.894 | 0.923 | 0.908 | 0.883 | 0.870 | 0.876 |
| Vehicle         | 0.870 | 0.987 | 0.929 | 0.823 | 0.964 | 0.893 |
| Walking/running | 0.687 | 0.981 | 0.834 | 0.574 | 0.983 | 0.779 |
| Standing        | 0.797 | 0.929 | 0.851 | 0.687 | 0.904 | 0.795 |
| Average         | 0.812 | 0.955 | 0.881 | 0.742 | 0.930 | 0.836 |

BA: balanced accuracy; sens: sensitivity; spec: specificity

**Adapted from** Ellis K *et al.* Hip and Wrist Accelerometer Algorithms for Free-Living Behavior Classification. *Med. Sci. Sports Exerc.* 2016.

**Table 5.** Severe Neonatal Morbidity definition according to term/preterm status

| <b>Preterm</b>                                                                           | <b>Term</b>                                     |
|------------------------------------------------------------------------------------------|-------------------------------------------------|
| Grade III and IV intraventricular haemorrhage                                            | Grade II or III hypoxic ischemic encephalopathy |
| Chronic lung disease (home on O <sub>2</sub> or on O <sub>2</sub> at 36 weeks gestation) | Ventilation>24 hours                            |
| Necrotizing enterocolitis                                                                | Neonatal intensive care admission >4 days       |
| Retinopathy of prematurity, stage 3 or 4                                                 | Apgar score <4 at 5 mins                        |
| Sepsis (blood or CSF culture proven)                                                     | Cord arterial pH<7.0 and/or base excess>-15     |
| Cystic peri-ventricular leukomalacia                                                     | Neonatal seizures                               |

1  
2  
3 **Figure legends:**  
4  
5

6 **Figure 1.** Set points of MAES-I study

7  
8 **Figure 2.** Estimated prevalence of preterm birth and preeclampsia according to  
9 gestational age (RED represents majority of cases) and period of evaluation of PA and  
10 sleep patterns (in GREEN)  
11  
12  
13  
14  
15  
16  
17  
18  
19  
20  
21  
22  
23  
24  
25  
26  
27  
28  
29  
30  
31  
32  
33  
34  
35  
36  
37  
38  
39  
40  
41  
42  
43  
44  
45  
46  
47  
48  
49  
50  
51  
52  
53  
54  
55  
56  
57  
58  
59  
60

For peer review only

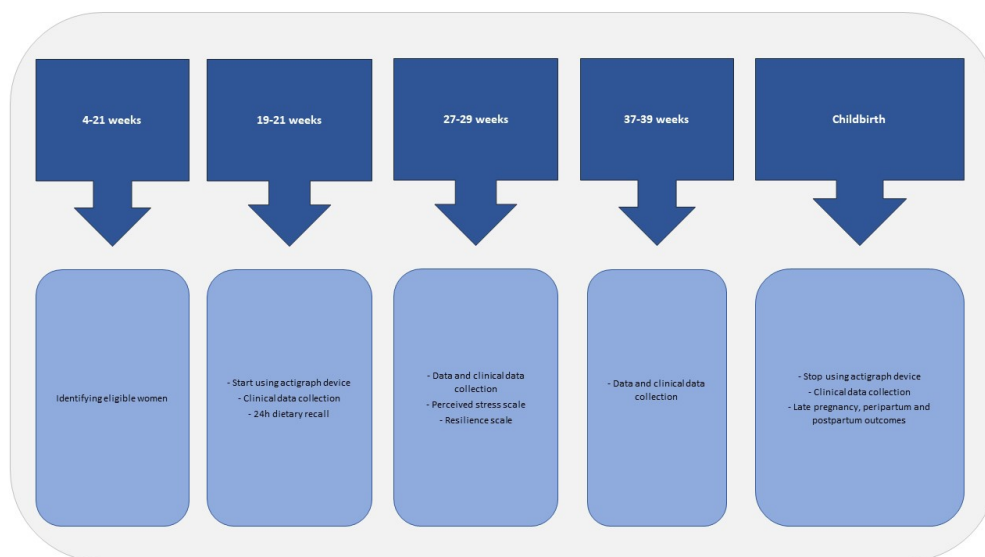

Figure 1

338x190mm (96 x 96 DPI)

1  
2  
3  
4  
5  
6  
7  
8  
9  
10  
11  
12  
13  
14  
15  
16  
17  
18  
19  
20  
21  
22  
23  
24  
25  
26  
27  
28  
29  
30  
31  
32  
33  
34  
35  
36  
37  
38  
39  
40  
41  
42  
43  
44  
45  
46  
47  
48  
49  
50  
51  
52  
53  
54  
55  
56  
57  
58  
59  
60

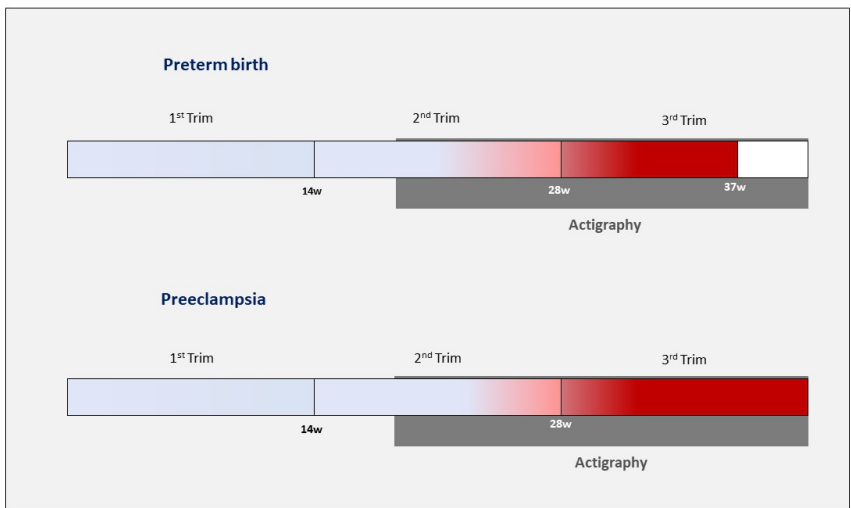

Figure 2

338x190mm (96 x 96 DPI)

# BMJ Open

## The identification of earlier predictors of pregnancy complications through wearable technologies in a Brazilian multicenter cohort: Maternal Actigraphy Exploratory Study I (MAES-I) study protocol

|                                 |                                                                                                                                                                                                                                                                                                                                                                                                                                                                                                                                                                                                                                                                                                                                                                                                                                                                                                                                                                                                                               |
|---------------------------------|-------------------------------------------------------------------------------------------------------------------------------------------------------------------------------------------------------------------------------------------------------------------------------------------------------------------------------------------------------------------------------------------------------------------------------------------------------------------------------------------------------------------------------------------------------------------------------------------------------------------------------------------------------------------------------------------------------------------------------------------------------------------------------------------------------------------------------------------------------------------------------------------------------------------------------------------------------------------------------------------------------------------------------|
| Journal:                        | <i>BMJ Open</i>                                                                                                                                                                                                                                                                                                                                                                                                                                                                                                                                                                                                                                                                                                                                                                                                                                                                                                                                                                                                               |
| Manuscript ID                   | bmjopen-2018-023101.R1                                                                                                                                                                                                                                                                                                                                                                                                                                                                                                                                                                                                                                                                                                                                                                                                                                                                                                                                                                                                        |
| Article Type:                   | Protocol                                                                                                                                                                                                                                                                                                                                                                                                                                                                                                                                                                                                                                                                                                                                                                                                                                                                                                                                                                                                                      |
| Date Submitted by the Author:   | 06-Aug-2018                                                                                                                                                                                                                                                                                                                                                                                                                                                                                                                                                                                                                                                                                                                                                                                                                                                                                                                                                                                                                   |
| Complete List of Authors:       | Souza, Renato; Universidade Estadual de Campinas, Obstetrics and Gynecology<br>Cecatti, Jose; University of Campinas, Obstetrics and Gynecology<br>Mayrink, Jussara; Universidade Estadual de Campinas Faculdade de Ciencias Medicas<br>Galvão, Rafael; Universidade Estadual de Campinas, Obstetrics and Gynecology<br>Costa, Maria Laura; Universidade Estadual de Campinas, Obstetrics and Gynecology<br>Feitosa, Francisco; Universidade Federal do Ceara, Maternidade Escola Rocha Filho, Edilberto; Universidade Federal de Pernambuco, Obstetrics and Gynecology<br>Leite, Debora; Universidade Federal de Pernambuco, Obstetrics and Gynecology<br>Vettorazzi, Janete; Universidade Federal do Rio Grande do Sul, Obstetrics and Gynecology<br>Tedesco, Ricardo; School of Medicine of Jundiai, Obstetrics and Gynecology<br>Santana, Danielly; Universidade Estadual de Campinas, Obstetrics and Gynecology<br>Souza, Joao Paulo; Universidade de Sao Paulo Faculdade de Medicina de Ribeirao Preto, Social Medicine |
| <b>Primary Subject Heading</b>: | Obstetrics and gynaecology                                                                                                                                                                                                                                                                                                                                                                                                                                                                                                                                                                                                                                                                                                                                                                                                                                                                                                                                                                                                    |
| Secondary Subject Heading:      | Obstetrics and gynaecology                                                                                                                                                                                                                                                                                                                                                                                                                                                                                                                                                                                                                                                                                                                                                                                                                                                                                                                                                                                                    |
| Keywords:                       | wearable technologies, actigraph, physical activity, sleep patterns, pregnancy complications                                                                                                                                                                                                                                                                                                                                                                                                                                                                                                                                                                                                                                                                                                                                                                                                                                                                                                                                  |
|                                 |                                                                                                                                                                                                                                                                                                                                                                                                                                                                                                                                                                                                                                                                                                                                                                                                                                                                                                                                                                                                                               |

SCHOLARONE™  
Manuscripts

1  
2  
3  
4  
5  
6  
7  
8  
9  
10  
11  
12  
13  
14  
15  
16  
17  
18  
19  
20  
21  
22  
23  
24  
25  
26  
27  
28  
29  
30  
31  
32  
33  
34  
35  
36  
37  
38  
39  
40  
41  
42  
43  
44  
45  
46  
47  
48  
49  
50  
51  
52  
53  
54  
55  
56  
57  
58  
59  
60

## STUDY PROTOCOL

### **The identification of earlier predictors of pregnancy complications through wearable technologies in a Brazilian multicenter cohort: Maternal Actigraphy Exploratory Study I (MAES-I) study protocol**

Renato T. Souza <sup>1</sup>, Jose G. Cecatti <sup>1#</sup>, Jussara Mayrink <sup>1</sup>, Rafael B. Galvao <sup>1</sup>, Maria L. Costa <sup>1</sup>, Francisco E. Feitosa <sup>2</sup>, Edilberto A Rocha Filho <sup>3</sup>, Débora F Leite <sup>1,3</sup>, Janete Vettorazzi <sup>4</sup>, Ricardo P Tedesco <sup>5</sup>, Danielly S Santana <sup>1,5</sup>, Joao P. Souza <sup>6</sup>, for the MAES-I Study Group\*

#### **Affiliations**

<sup>1</sup> Department of Obstetrics and Gynecology, University of Campinas (UNICAMP) School of Medical Sciences, Campinas, SP, Brazil

<sup>2</sup> MEAC – School Maternity of the Federal University of Ceará, in Fortaleza, CE, Brazil

<sup>3</sup> Department of Maternal and Child Health, Maternity of Clinic Hospital, Federal University of Pernambuco, in Recife, PE, Brazil

<sup>4</sup> Department of Obstetrics and Gynecology, Maternity of the Clinic Hospital, Federal University of RS, Porto Alegre, RS, Brazil

<sup>5</sup> Department of Obstetrics and Gynecology, Jundiaí Medical School, Jundiaí, SP, Brazil

<sup>6</sup> Department of Social Medicine, Ribeirão Preto Medical School, University of Sao Paulo, Ribeirão Preto, SP, Brazil

\*Membership of the MAES-I study group is provided in the Acknowledgments.

**E-mail addresses:** RT Souza: [renatotsouzasp@gmail.com](mailto:renatotsouzasp@gmail.com); JG Cecatti: [cecatti@unicamp.br](mailto:cecatti@unicamp.br); J Mayrink: [jussaramayrink@gmail.com](mailto:jussaramayrink@gmail.com); RB Galvão: [rafaelbfg@gmail.com](mailto:rafaelbfg@gmail.com); ML Costa: [mlaura@unicamp.br](mailto:mlaura@unicamp.br); FE Feitosa: [edson.lucena@hotmail.com](mailto:edson.lucena@hotmail.com); EA Rocha Filho: [edilbertorocha@globocom.com](mailto:edilbertorocha@globocom.com); DF Leite: [debora.leite@ufpe.br](mailto:debora.leite@ufpe.br); J Vettorazzi: [janetev@terra.com.br](mailto:janetev@terra.com.br); RP Tedesco: [rp.tedesco@yahoo.com.br](mailto:rp.tedesco@yahoo.com.br); DS Santana: [dany.fmj@terra.com.br](mailto:dany.fmj@terra.com.br); JP Souza: [jp.souza@usp.br](mailto:jp.souza@usp.br)

#### **#Corresponding Author**

JG Cecatti

DO&G, University of Campinas

R. Alexander Fleming, 101

Campinas, SP, 13083-881

Brazil

E-mail: [cecatti@unicamp.br](mailto:cecatti@unicamp.br)



## 1 **Abstract**

2 **Introduction:** non-invasive tools capable of identifying predictors of maternal  
3 complications would be a step forward in the improvement of maternal and perinatal  
4 health. There is association between modification of physical activity (PA) and sleep-  
5 wake patterns and the occurrence of inflammatory, metabolic, pathologic conditions  
6 as chronic diseases. The actigraph device is validated to estimate PA and sleep-wake  
7 patterns and might be valuable to identify predictors for maternal complications,  
8 widening the window of opportunity to prevent, diagnose or treat specific conditions  
9 prior to the development of typical symptoms or clinical signs, assessing PA and sleep-  
10 wake patterns during pregnancy.

11 **Methods and analysis:** A cohort will be held in 5 centres from the Brazilian Network  
12 for Studies on Reproductive and Perinatal Health. MAES-I will enroll 400 low-risk  
13 nulliparous women that will wear the actigraph device on the wrist during day and  
14 night (24h/day) uninterruptedly from 19-21 weeks until childbirth. Changes in PA and  
15 sleep-wake patterns through pregnancy will be analyzed, considering gestational age  
16 ranges, in women with and without maternal complications during pregnancy, such as  
17 preeclampsia, preterm birth (spontaneous and provider-initiated), gestational  
18 diabetes, maternal haemorrhage and also perinatal outcomes. A predictive model for  
19 screening pregnant women for risk of specific adverse maternal and perinatal  
20 outcomes is planned to be then developed using the actigraphy data.

21 **Ethics and Dissemination:** MAES-I study has been reviewed and approved by each  
22 Institutional Review Board (IRB) and also by the National Council for Ethics in Research.  
23 Detailed information of the study is provided in the Brazilian Cohort website  
24 ([www.medscinet.com/samba](http://www.medscinet.com/samba)) and findings will be publicized in scientific literature and  
25 Institutional webpages.

26 **Keywords:** wearable technologies; actigraph; physical activity; sleep patterns; sleep-  
27 wake cycle; prediction; pregnancy complications.

28

29

30

1  
2  
3 **1 Strengths and limitations of this study**  
4

- 5  
6  
7  
8  
9  
10  
11  
12  
13  
14  
15  
16  
17  
18  
19  
20  
21  
22  
23  
24  
25  
26  
27  
28  
29  
30  
31  
32  
33  
34  
35  
36  
37  
38  
39  
40  
41  
42  
43  
44  
45  
46  
47  
48  
49  
50  
51  
52  
53  
54  
55  
56  
57  
58  
59  
60
- This multicentre cohort will collect comprehensive data on the main maternal and perinatal complications as pre-eclampsia, small for gestational age/fetal growth restriction, preterm birth and gestational diabetes mellitus.
  - Physical activity and sleep patterns will be estimated through an innovative wearable device used in the natural environment of the study subject.
  - Physical activity and sleep patterns will be estimated from the beginning of the second half of pregnancy until delivery, covering a wide interval during pregnancy and enabling the study of PA and sleep patterns changes throughout pregnancy.
  - One possible limitation refers to the uncovered first half of pregnancy regarding this information.

## 1 Background

2 Reducing the global maternal mortality ratio to less than 70 per 100,000 live births by  
3 2030 is one of the targets of the new United Nations Sustainable Development Goals  
4 [1]. Multiple challenges need to be tackled to achieve this target, but the 2016-2030  
5 health and development agenda goes well beyond mortality reduction. The Global  
6 Strategy for Women's, Children's and Adolescent's Health aims to ensure that every  
7 newborn, women and child not only survive but thrive. This will only be possible if a  
8 transformative agenda, with innovation at the central stage, is put into action [2].

9 One of the major challenges that need to be addressed is optimizing the recognition of  
10 earlier predictors and identifiers of maternal and perinatal complications. Delays in  
11 diagnosing and managing maternal complications have been associated with poor  
12 outcomes [3]. The reduced self-perception of clinical signs related to maternal  
13 complications, difficulties in accessing the health system and poor quality of care may  
14 contribute to the late identification of complications and worsened prognosis. The  
15 development of a non-invasive Antenatal Care (ANC) tool capable of identifying  
16 maternal sub-clinical signs during pregnancy may provide the window of opportunity  
17 for the earlier identification of abnormal patterns of physiologic parameters related to  
18 pregnancy complications. We consider earlier identification when the recognition  
19 could be made before clinical presentation, when standard criteria based on clinical  
20 signs, symptoms, and supplementary tests are presented. Shortening the time  
21 between the onset of a complication and the initiation of the appropriate  
22 management allow for secondary prevention and reduction of maternal morbidity and  
23 mortality [3–7].

24 Pervasive computing (i.e. the trend towards embedding microprocessors in everyday-  
25 life objects so they can generate data) and wearable technology (i.e. clothing and  
26 accessories incorporating computer and advanced electronic technologies such as  
27 wrist and/or waistband sensors) are ubiquitous and able to generate a new dataset  
28 that needs to be correlated with pregnancy outcomes. Preterm birth and  
29 preeclampsia, for instance, are two important pregnancy complications that have a  
30 relatively long subclinical phase before the appearance of signs or symptoms [8, 9]. It is  
31 plausible that during this subclinical phase of certain conditions the pattern of physical

1 activity (PA) or sleep-wake rhythm is affected in some way and this change could be  
2 captured through wearable devices. Although some studies show that PA patterns  
3 (actigraphy parameters) may be related to systemic inflammation and diseases in the  
4 general population [10, 11], published literature correlating wearable technology data  
5 and maternal complications are very scarce.

6 The human circadian rhythm is ruled by endogenous physiologic mechanisms and  
7 environmental stimuli [12]. There is solid evidence showing that modification of  
8 circadian rhythm or sleep and PA patterns are an underlying condition related to  
9 inflammatory, degenerative and/or metabolic chronic diseases as diabetes,  
10 hypertension, and cancer [13]. Circadian misalignment is defined as having  
11 inappropriate timed sleep and wake, misplaced feeding periods and modification of  
12 activity behavior.

13 The determination of cause or consequence effect between these modifications and  
14 the development of pathological conditions is a complex task. It seems that changes in  
15 appetite-stimulating hormones, glucose metabolism, inflammatory markers, and mood  
16 are some of the related pathways [13–15]. Leproult *et al.* evaluated the effect of  
17 circadian misalignment on metabolic and inflammation markers in cardiovascular  
18 disease [15]. The insulin action and release, and also the levels of some inflammatory  
19 markers that are predictors for cardiovascular diseases, were abnormal in individuals  
20 with circadian misalignment. The mechanisms involved in the association between  
21 changes of PA pattern and pathologic conditions seem to be of multiple etiologies. Sani  
22 *et al.* assessed the circadian rhythm of more than 2,300 African descendant adults. More  
23 than evaluating physical activity itself, the authors aimed to identify chronobiologic  
24 patterns of adults from different socioeconomic settings. The study identified that  
25 chronobiologic behavior can vary depending on individual BMI, socioeconomic  
26 background, work type and time of sunlight exposure. Possibly, many other factors are  
27 involved in modifications of chronobiologic behavior, such as pathologic conditions.  
28 Some metabolic, cognitive, cardiovascular and other chronic degenerative diseases  
29 have been associated with particular patterns of PA and sleep [10, 11, 16–18]. A  
30 previous observational study assessed various sleep parameters during pregnancy, e.g.  
31 sleep onset latency (SOL), wake after sleep onset (WASO) and total nocturnal sleep

1 time (TST). Difficulty in initiating sleep in early pregnancy was associated with higher  
2 body mass index, greater weight gain and higher blood pressure during pregnancy  
3 [17]. Palagini *et al.* reviewed clinical evidence between chronic sleep loss and  
4 pregnancy adverse outcomes, discussing common mechanisms of stress system  
5 activation [19]. Low-quality evidence suggests an association between sleep loss and  
6 prenatal depression, gestational diabetes, preeclampsia, abnormal length of labour,  
7 caesarean delivery, abnormal fetal growth, and preterm birth. Those results  
8 corroborate with other findings regarding pregnancy and sleep disorders [20–23].

9 The assessment of PA and the sleep patterns can be performed using small wrist (or  
10 waist) devices similar to a regular watch (actigraphy technology). The type of sensor,  
11 batteries, materials and output data have been substantially developed in recent  
12 years, enabling low cost, comfort, discretion and performance [24]. Nowadays there  
13 are devices that are portable, lightweight and with a large capacity to storage  
14 information, including a software with automatic scoring algorithms packages for the  
15 detection of wakefulness, sleep periods and PA [24, 25]. The actigraphy estimation of  
16 PA and sleep patterns is validated as a proxy for chronobiologic behavior [26–29] and 7  
17 to 14 days using the actigraph device provides reliable estimates of PA behavior in  
18 older adults [30–32]. Both hip and wrist devices show reliable and acceptable  
19 performance in estimating PA and sleep-wake patterns [33–36].

20 The main advantages of using wearable devices for actigraphy is the non-invasiveness,  
21 24/7 monitoring of the circadian pattern and PA, and informing sleep habits and  
22 parameters in the user natural environment [24, 25, 28]. We propose an innovative  
23 and strategic approach to monitor PA and sleep-wake patterns during pregnancy,  
24 establishing a large database comprised of clinical, epidemiological, PA and sleep-wake  
25 variables potentially capable of composing a prediction model for maternal  
26 complications during pregnancy. The main goal of this study is to identify earlier  
27 predictors of pregnancy complications by correlating data generated on PA and sleep  
28 patterns through wearable devices (wristband sensors) with maternal and perinatal  
29 complications and outcomes.

## 30 **Methods/Design**

## 1 **Study design**

2 We will conduct a cohort study of 400 low-risk pregnant women using wrist sensor  
3 bands able to capture information on daily physical activity and sleep patterns  
4 (exposure). This cohort study will be implemented in 5 ANC clinics linked to obstetric  
5 units in 3 different regions of Brazil that are already part of the Brazilian Network for  
6 Studies on Reproductive and Perinatal Health [37], as shown in Table 1. During a  
7 period of eight months, the ANC clinics will identify eligible cases for using the  
8 wristband sensors. Wearable technology data will be correlated with the occurrence  
9 of pregnancy and childbirth complications and outcomes, thus understood as an  
10 effect.

11 Eligible women will be identified up to 21 weeks of gestation and invited to participate.  
12 A proper consent form will be applied and the women who agree to participate will  
13 receive a wristband sensor to be used starting at 19-21 weeks until childbirth,  
14 uninterruptedly.

## 15 **Study setting and population**

16 Brazil is a multi-ethnic mixed-race population of diverse resourced settings [38].  
17 Despite the considered high global overall human development index (HDI 0.727) in  
18 2010, the HDI of Brazilian municipalities ranged from 0,862 to 0,418 [39]. The  
19 possibility of considering such mixed population is suitable to explore information  
20 regarding maternal patterns of mobility and sleep, maximizing external validity and  
21 comparisons to other populations. A few reasons might support the study population  
22 focused in low-risk nulliparous women: 1) Previous obstetric history can refer to  
23 known risk factors for many maternal complications such as preterm birth,  
24 preeclampsia, and diabetes [13, 40]. Nulliparous women enable unbiased sampling  
25 regarding obstetric history. 2) Women with previous morbidity such as hypertension,  
26 diabetes, nephropathy or others chronic/degenerative diseases are more likely to  
27 present abnormalities of sleep-wake rhythm or physical activity patterns during  
28 pregnancy.

## 29 **Sampling**

1  
2  
3 1 The five participating centers are regional referral obstetric units responsible for  
4 2 antenatal care assistance mainly for high-risk pregnant women. Participating centers  
5 3 are listed in Table 1. Nevertheless, there are primary health care units strategically  
6 4 linked with these participating centers, enabling the identification and enrollment of  
7 5 low-risk pregnant women. The recruitment strategies include approaching all eligible  
8 6 women in these participating centers and their linked facilities. An informed consent  
9 7 form will be applied for women who agree to participate.

#### 8 *Eligible women: Low-risk pregnant subjects*

9 There is no international consensus on the criteria for low-risk pregnancies, although  
10 there are several known factors associated with maternal and perinatal adverse  
11 outcomes. A recent study evaluating complications of “low-risk” pregnancies of US  
12 Americans (10 million births from 2011 through 2013) showed that 29% of low-risk  
13 women had an unexpected complication requiring no routine obstetric/neonatal care  
14 [41]. This shows the difficulty in establishing a “low-risk profile” for maternal/perinatal  
15 complications. As an exploratory study, we tried to exclude potential known  
16 confounders of pre-pregnancy conditions related to adverse maternal or perinatal  
17 outcomes as shown in Table 2, in order to assess PA and sleep patterns of a mostly  
18 “normal” population. Nonetheless, lifestyle habits and body composition (Body mass  
19 index, height, etc.) characteristics, and some non-severe chronic diseases as non-  
20 severe anaemia and/or asthma are not among exclusion criteria but may be part of  
21 subgroup analyses (composition of any previous disorder, e.g.). Intra and inter-  
22 individual analyses of PA and sleep patterns enable the identification of potential  
23 confounders affecting primary outcomes, avoiding potential biases. It means that  
24 comparison of PA and sleep pattern parameters collected in different stages of  
25 pregnancy from the same participant (intra-individual analysis) and collected at the  
26 same stage of pregnancy from different participants (inter-individual analysis) will be  
27 carried out.

28 Eligible women will be enrolled between 04-21 weeks. The inclusion and exclusion  
29 criteria are presented in Table 2.

#### 30 ***Data collection methods***

1  
2  
3 1 Essentially, MAES I study is comprised of 4 key set points – 3 clinical visits during  
4 pregnancy and a postnatal visit. The clinical visits will be held at 1) between 19-21  
5 2 weeks; 2) between 27-29 weeks; 3) between 37-39 weeks. At first, second, third and  
6 3 postnatal visits, additional information regarding maternal history, details on  
7 4 pregnancy complications, maternal biophysical data (weight, height, skinfolds) and  
8 5 pregnancy adverse outcomes will be collected following a specific Standard Operating  
9 6 Procedure (SOP) specially developed for MAES-I study. Additionally, the Perceived  
10 7 Stress Scale [42] and Resilience Scale [43] will be applied during 27-29w visit. Figure 1  
11 8 shows the set points of MAES-I study.  
12 9

13 10 Eligible women will be invited to use a small wrist device similar to a regular watch  
14 11 (GENEActiv Original – Activinsights®). The device contains sensors that estimate PA and  
15 12 sleep-awake patterns through a proper software algorithm. At the first set point of  
16 13 MAES-I study (between 19+0 - 21+0 weeks of gestation), eligible women who agreed  
17 14 to participate will start using the wrist bracelet device on the non-dominant arm  
18 15 during day and night (24h/day) uninterruptedly until childbirth (including bathing or  
19 16 aquatic activities). The acquisition of actigraphy data can be performed in different  
20 17 frequencies (from 10Hz to 100Hz). Since the frequency of data acquisition impacts on  
21 18 the battery life of the device (inverse relationship), the measurement frequency will be  
22 19 set up according to the participant's gestational age (Table 3). This information will be  
23 20 registered in the database accordingly. The data accumulated will be downloaded  
24 21 during participant's antenatal care visits, according to the maximum return periods  
25 22 showed in Table 3. The maximum return periods were calculated taking into  
26 23 consideration the expected battery life. At each antenatal care visit, the used device  
27 24 will be returned to the research team and a new charged device will be provided to the  
28 25 participant.

29 26 A leaflet with detailed information and FAQ (Frequently asked questions) on the device  
30 27 will also be provided to the women. They will also have a cell phone number to call  
31 28 whether doubts arise regarding the procedures for using the device, or if any technical  
32 29 or medical concern arises.

33 30 All actigraphy data collected will be entered into proper software to interpret data and  
34 31 generate an output file. Then, the actigraphy data will be uploaded to an online



1 database platform developed by MedSciNet®, where all clinical data of the study will  
2 also be registered. The actigraphy software uses several algorithms to estimate  
3 physical activity and sleep patterns. The database is centralized, secure, internet-  
4 based and allows several procedures for prospective and retrospective monitoring,  
5 hierarchical access (local user, general manager, etc.). The database will be translated  
6 into Portuguese and English, facilitating data collection for Portuguese-speaking team  
7 and international monitoring. A correspondent paper form will be available for data  
8 collection if necessary (e.g. internet connection failure for instance).

#### 9 *Decision to start monitoring PA and sleep patterns between 19-21 weeks*

10 There are various underlying mechanisms involved in the development of the maternal  
11 and perinatal adverse outcomes that will be assessed, as preterm birth, preeclampsia,  
12 gestational diabetes, fetal growth restriction and small for gestational age. The pre-  
13 clinical phase, stage where there are no clinical signs or symptoms, might be different  
14 for each disease and dependent on environmental and individual aspects. The study of  
15 adverse maternal and perinatal predictors has been focused in early pregnancy so far  
16 (first trimester, <14 weeks of gestation), aiming to maximize the window of  
17 opportunity for preventative interventions. However, we hypothesized that the  
18 modification of PA and/or sleep pattern due to maternal underlying changes of  
19 biological function might not be evident at a very early stage in pregnancy before the  
20 beginning of the pre-clinical phase. Our hypothesis is that it possibly occurs shortly  
21 before symptoms.

22 Additionally, we took into account that the occurrence of the main maternal  
23 complications, as preeclampsia, fetal growth restriction, and preterm birth, are more  
24 common in late pregnancy to establish the period between 19-21 weeks as  
25 appropriate to start the assessment of PA and sleep patterns. A recent cross-sectional  
26 study conducted in 20 referral centres in Brazil, including the five participating centres  
27 of this proposal, showed that the occurrence of preterm birth before 28 weeks  
28 comprised less than 1% of all births and less than 8% of all preterm births [44]. In  
29 addition, the early onset of preeclampsia (before 34 weeks of gestation) complicates  
30 less than 0.4% of all pregnancies, according to a large retrospective cohort of more  
31 than 450,000 deliveries in USA [45]. Figure 2 outlines the predicted prevalence of

1  
2  
3 1 preterm birth and preeclampsia in the second trimester, highlighting its clinical  
4 2 presentation, when classic symptoms and signs of a certain disease/complication are  
5 3 presented, through pregnancy in red. Our hypothesis is that PA and sleep patterns  
6 4 might be altered closely to the clinical presentation, still in preclinical phase when  
7 5 there is no symptoms or signs.

8  
9  
10  
11  
12 6 In brief, as an exploratory study, we indeed needed to make an arbitrary decision  
13 7 regarding interval of monitoring PA and sleep patterns. For that, we had taken into  
14 8 consideration: 1) the main maternal/perinatal complications of interest occur in the  
15 9 second half of pregnancy, more precisely in late pregnancy (Figure 2); 2) we  
16 10 hypothesize that any potential change on PA or sleep patterns might occur days or  
17 11 weeks before the onset of maternal or perinatal complication. Then, we focused  
18 12 monitoring women during second half of pregnancy.

19  
20  
21  
22  
23  
24 13 Thus, the start of assessment between 19-21 weeks seems to be very reasonable,  
25 14 providing a wide interval to monitor and predict the main maternal and perinatal  
26 15 adverse outcomes.

#### 27 28 29 30 16 *Actigraph device*

31  
32  
33  
34 17 The actigraph device that will be used to monitor PA and sleep-wake patterns is  
35 18 GENEActiv Original (GENEActiv, Activinsights Ltd, Huntingdon, UK). The device has  
36 19 multiple sensors as microelectromechanical (MEMS) accelerometer, temperature  
37 20 (linear active thermistor) and light (silicon photodiode), providing crude raw data for a  
38 21 variety of applications.

#### 39 40 41 22 *Wrist vs waist wear: advantages and performance*

42  
43 23 Wrist wear of actigraph devices provides more comfortable use during wake and sleep  
44 24 periods and highest wear time compared to waist monitors [33, 46]. A non-systematic  
45 25 review published in 2011 showed that actigraphy is a useful and reliable tool to assess  
46 26 sleep patterns and circadian rhythm disorders, although there are some limitations on  
47 27 diagnosing sleep diseases or measuring sleep stages [25]. Actigraphy showed excellent  
48 28 concordance with polysomnography in assessing sleep parameters in healthy subjects  
49 29 (sensitivity >90% in estimating total sleep time, for instance). A recent study evaluated  
50 30 the concordance of physical activity estimation of wrist device in free-living settings in

1  
2  
3 1 forty overweight or obese women [34]. They used both wrist and hip devices, and a  
4 2 small camera that captured participant behaviour for 7 days, enabling the monitoring  
5 3 of physical activity behaviour (gold-standard comparison). The hip and wrist machine  
6 4 learning (ML) classifiers used are different due to the different methods/algorithms to  
7 5 estimate physical activity [34]. The sensitivity and specificity of hip and wrist  
8 6 estimations according to Ellis *et al* are showed in Table 4 [34].

9 7 Two years ago, the same author had published a similar evaluation using 40 adults  
10 8 (women and men), showing that the hip and wrist accelerometers obtained an average  
11 9 accuracy of 92.3% and 87.5%, respectively, in predicting PA types [47].

12 10 Staudenmayer *et al* developed an investigation with 20 participants also using two  
13 11 devices (wrist- and hip- worn), and showed that wrist actigraphy can estimate energy  
14 12 expenditure accurately and relatively precisely [48]. Another study evaluating PA  
15 13 patterns in a free-living environment with wrist devices showed that women in the top  
16 14 40% or bottom 40% of the distribution of daily PA, hip and wrist accelerometers  
17 15 agreed on the classification for about 75% of the women [49]. Additionally, the total  
18 16 activity (counts per day) was moderately correlated (Spearman's  $r = 0.73$ ) between the  
19 17 wrist and hip worn devices.

20 18 At the best of our knowledge, there are no systematic reviews or other high-quality  
21 19 evidence-based recommendation supporting a particular method. Although wrist wear  
22 20 of actigraphy is not the more traditional method, it might be the best choice for  
23 21 assessing long periods of PA or sleep patterns, even more considering the similar  
24 22 performance of the waist wear. The current proposal does not intend to diagnose  
25 23 pathologic behaviours or diseases, but to identify different patterns along pregnancy  
26 24 and in different subgroups of women. Therefore, supported by the evidence that wrist  
27 25 wear of actigraphy devices can accurately and more comfortably estimate PA and  
28 26 sleep patterns, mainly for long periods and in the free-living environment, the MAES-I  
29 27 study group adopted wrist wear devices.

### 30 28 **Main variables**

31 29 The independent variables assessed as potential predictors of maternal complications  
32 30 will be related to sleep-wake cycle and mobility as:

1  
2  
3 1 *“Sleep” variables*

- 4  
5 2 - Sleep onset latency (SOL): time elapsed between full wakefulness to sleep.  
6  
7 3 - Total sleep time (TST): The amount of actual sleep time in a sleep episode  
8 (excludes awakes).  
9  
10 4  
11 5 - Wake after sleep onset (WASO): defined as total amount of time awake after sleep.  
12 6 - Sleep Efficiency (SE): the proportion of sleep in the period potentially filled by  
13 7 sleep-ratio of total sleep time to time in bed.

14  
15  
16 8 The actigraph collects many pieces of information related to body position and  
17 9 body movements to estimate the described sleep variables. Then, actigraphy software  
18 will be used to analyse the data and generates the output variables.  
19  
20

21 11 *“Physical activity” variables*

22  
23 12 Actigraphy technology estimates physical activity through various parameters  
24 13 collected by the actigraph device. Briefly, according to Freedson *et al*, the triaxial  
25 14 sensors stressed by acceleration forces can estimate the intensity of movements. The  
26 15 acceleration signal is converted to digital signal and summed over a user specified  
27 16 time interval (epoch). At the end of each epoch the activity count is stored. Then,  
28 17 according to Count per minute (CPM) cut points, the PA intensity can be categorized  
29 18 [50]. The information is translated by the software using proper algorithms into  
30 19 quantitative variables as following:

- 31  
32  
33  
34  
35  
36  
37  
38 20 - Sedentary time (hours/day): the number of hours per day of count per minute  
39 21 between 0-99.  
40  
41  
42 22 - Light activity (hours/day): the number of hours per day having count per minute  
43 23 between 100 - 1951.  
44  
45  
46 24 - Moderate activity (minutes/day): the number of hours per day having count per  
47 25 minute between 1952 - 5724.  
48  
49  
50 26 - Vigorous activity (minutes/day): the number of hours per day having count per  
51 27 minute between 5725 - 9498.  
52  
53  
54 28 - Very vigorous activity (minutes/day): the number of hours per day having count  
55 29 per minute between 9499 - ∞.

- 1  
2  
3 1 - MET rates: Metabolic Equivalents (METs) are commonly used to also express  
4 2 the intensity of physical activities. One MET is the energy cost of resting quietly,  
5 3 often defined in terms of oxygen uptake as  $3.5 \text{ mL}\cdot\text{kg}^{-1}\cdot\text{min}^{-1}$ . MET rate  
6 4 expresses a person's working metabolic rate relative to their resting metabolic  
7 5 rate. Briefly, the triaxial piezoelectric sensors stressed by acceleration forces can  
8 6 estimate the intensity of movements, converted to the oxygen consumption  
9 7 required to perform such movement.  
10 8  
11 8 - Step counts/day: estimated steps count per day (estimated by proper  
12 9 algorithms using accelerometer data.)  
13  
14  
15  
16  
17  
18

### 19 *Outcomes*

20  
21 The primary outcomes are late pregnancy complications as:

- 22  
23 12 - Preeclampsia: Hypertension after 20 weeks of gestation, systolic BP  $\geq 140\text{mmHg}$   
24 13 and/or diastolic BP  $\geq 90\text{mmHg}$  (Korotkoff V) on at least 2 occasions 4h apart with:  
25 14 1) Proteinuria  $300 \text{ mg}/24\text{h}$  or spot urine protein: creatinine ratio  $30 \text{ mg}/\text{mmol}$   
26 15 creatinine or urine dipstick protein  $\geq (+)$  OR, in the absence of proteinuria,  
27 16 hypertension and 2) any multi-system complication that are: Haematological  
28 17 abnormalities; thrombocytopenia (platelets  $< 100 \times 10^9/\text{L}$ ); Disseminated  
29 18 intravascular coagulation (DIC), and haemolysis; Liver disease: increased  
30 19 aspartate transaminase and/or alanine transaminase  $> 45 \text{ IU}/\text{L}$  and/or severe  
31 20 right upper quadrant or epigastric pain, liver rupture; Neurological problems:  
32 21 eclampsia, imminent eclampsia (severe headache with hyperreflexia and  
33 22 persistent visual disturbance), cerebral haemorrhage; Acute renal insufficiency:  
34 23 new increase in serum creatinine to  $> 100 \text{ mmol}/\text{L}$  antepartum or  $> 130 \text{ mmol}/\text{L}$   
35 24 postpartum; Pulmonary oedema confirmed by chest x-ray [51].  
36  
37  
38  
39 25 - Gestational Diabetes: new diabetes developing in pregnancy according to the WHO  
40 26 recommendation [52] that defines gestational diabetes as having:  
41  
42  
43  
44  
45  
46  
47  
48  
49  
50  
51  
52  
53  
54  
55  
56  
57  
58  
59  
60
- Fasting plasma glucose  $\geq 92 \text{ mg}/\text{dl}$ , or
  - 1-h plasma glucose tolerance test (75g load)  $\geq 180 \text{ mg}/\text{dl}$ , or
  - 2-h plasma glucose tolerance test (75g load)  $\geq 153 \text{ mg}/\text{dl}$ .

- 1  
2  
3 1 - Spontaneous Preterm Birth: spontaneous onset of preterm labour or premature  
4 rupture of membranes leading to preterm birth, childbirth before 37 weeks of  
5 gestation.  
6  
7  
8 4 - Provider-Initiated Preterm Birth: defined as childbirth occurring at less than 37  
9 weeks, medically indicated due to maternal/fetal compromise or both;  
10  
11 6 - Maternal Hemorrhage: Classified in 1) Antepartum haemorrhage defined as  
12 bleeding from the genital tract after 24 weeks of gestation; 2) Primary Postpartum  
13 haemorrhage as the loss of 500 ml blood or more from the genital tract within 24  
14 hours of the childbirth.  
15  
16  
17  
18

19 Secondary outcomes include childbirth variables and neonatal adverse outcomes as  
20 fetal death, caesarean section, small for gestational age (defined as birth weight below  
21 percentile 10 for gestational age), Apgar score < 7 at 5 minutes, neonatal severe  
22 morbidity (Table 5) and neonatal mortality before discharge.  
23  
24  
25

#### 26 ***Plans for analyses***

##### 27 *Sample size estimation*

28  
29  
30 This is an exploratory and innovative study focused on a specific population (pregnant  
31 women) and therefore there are no previously published parameters available for  
32 sample size estimation. Considering a relatively wide range of frequency of  
33 complications arising in pregnancy from 3 to 20% (including preeclampsia, fetal growth  
34 restriction, gestational diabetes, hemorrhage, preterm birth, etc.), a theoretical large  
35 population size (above 1 million pregnant women), an acceptable margin of error of  
36 4%, the involvement of 5 clusters (participating centers) and a 95% level of confidence,  
37 384 women would be necessary. Therefore, we are rounding up this estimation for at  
38 least 400 initially low-risk pregnant women to be enrolled in the study. We estimated  
39 the incidence of some main maternal complications considering the following studies:  
40  
41  
42  
43  
44  
45  
46  
47

- 48 - Pre-eclampsia: An international prospective cohort study with nulliparous women  
49 called SCOPE used similar criteria for the low-risk profile, having 5% of incidence of  
50 pre-eclampsia [53].  
51  
52  
53  
54  
55  
56  
57  
58  
59  
60

- 1  
2  
3 1 - Preterm Birth: A recent cross-sectional study conducted in 20 referral obstetric  
4 2 centres in Brazil, including the five participant centres of this proposal, showed a  
5 3 prevalence of 12.3% of all births [44].  
6  
7  
8 4 - Gestational Diabetes: SCOPE international cohort, previously mentioned, had a  
9 5 prevalence of 8.9% of gestational diabetes in low-risk screened nulliparous women,  
10 6 according to mainly to the NICE guidelines [54].  
11  
12 7 - Fetal growth restriction/small for gestational age: SCOPE international cohort,  
13 8 previously mentioned, had a prevalence of 10.7% of newborns small for gestational  
14 9 age, according to the customized centiles of birthweight (<10%)[55].  
15  
16  
17  
18

19 *Analyzes and statistics details*

20  
21 According to these studies above, the predicted incidence of these complications  
22 seems reasonable and reproducible in our cohort. Then, sample size estimation might  
23 assure enough cases of maternal and perinatal complications for the current proposal.  
24

25  
26 Firstly, we will identify PA and sleep-wake patterns of women who did not develop  
27 adverse maternal or perinatal outcomes. It will permit the recognition of a normal PA  
28 and sleep-wake patterns in low-risk population without complication during  
29 pregnancy. Using the same population, we will analyze changes in PA and sleep-wake  
30 patterns through pregnancy, allowing for gestational age periods.  
31  
32

33  
34  
35 Then, we will compare the PA and sleep-wake patterns of women who developed  
36 specific adverse maternal or perinatal outcomes with those who did not. The  
37 differences between groups might be identified to be used as potential markers for  
38 specific pregnancy complications.  
39  
40  
41

42  
43 After that, we will analyze changes in PA and sleep-wake patterns of women who  
44 developed adverse maternal or perinatal outcomes through pregnancy, comparing the  
45 patterns and trying to discover which changes and when before the onset it would be  
46 related to pregnancy complications. If possible, we will conduct subgroup analysis  
47 including subpopulation with potential higher risk for maternal complications  
48 (confounder variabls), including obesity, smoking, etc.  
49  
50  
51  
52  
53  
54  
55  
56  
57  
58  
59  
60

1  
2  
3 1 Finally, we will develop a predictive model for screening pregnant women for risk of  
4 2 specific adverse maternal and perinatal outcomes using PA and sleep-wake data  
5 3 estimated with actigraphy technology.

6  
7  
8 4 The analysis will be performed using the actigraph software that translates the  
9 5 collected information into PA and sleep-wake parameters. Additionally, Friedman and  
10 6 Wilcoxon for paired samples, t-test, and ANOVA for repeated measures will be applied  
11 7 to achieve statistical analyses. Also, we will address sensitivity, specificity and  
12 8 likelihood ratio for altered PA and sleep patterns or for their changes throughout  
13 9 pregnancy.

### 10 ***Discontinuation of participants***

11 The criteria for discontinuation include:

- 12 - Withdrawal of consent;
- 13 - Not regularly using the actigraph device for long periods, less than 50% of all  
14 planned time. The information that they are not using the device properly will be  
15 recorded if women notice the MAES-I team. Otherwise, the low use of the device  
16 will be noticed after data discharge during antenatal care visits.
- 17 - The loss to follow-up, not allowing the download of actigraphy data.

### 18 ***Data and Sample Quality***

19 All entered data will be prospectively and retrospectively monitored by local research  
20 assistants and a global monitor. Internal consistency of variables will be constantly  
21 performed by the database and error messages are automatically flagged. A local  
22 research assistant will be responsible for checking all forms and actigraphy data before  
23 locking forms, assuring good quality of data (double-checking entered data and  
24 checking for inconsistencies between variables, for instance). Then, the local principal  
25 investigator (PI) will be responsible for signing the case, enabling its incorporation to  
26 the final database. The University of Campinas will coordinate, implement and monitor  
27 the study in the five participating centres. A general manager and a global monitor are  
28 also part of the team of the coordinating centre. The local team of each participating  
29 centre is comprised of a Local PI and research assistants.

### 30 ***Ethics and Dissemination***



1  
2  
3 1 MAES-I study focuses on low-risk nulliparous Brazilian pregnant women. Despite being  
4 2 considered of low risk for maternal and perinatal complications, they are not free of  
5 3 suffering complications. Furthermore, the first and second delays, defined as a delay in  
6 4 deciding to seek care and delay in reaching a health care facility [56], are not  
7 5 uncommon, establishing a barrier between earlier recognition of symptoms and timely  
8 6 interventions capable to successfully treat potentially life-threatening conditions. We  
9 7 believe that women will feel encouraged, empowered and willing to participate in the  
10 8 study that aims to develop a potentially useful prenatal care tool to identify the risk for  
11 9 maternal and perinatal morbidity and mortality. Following national ethical regulations,  
12 10 the participants will not receive any financial compensation.

11 11 Women who agree to participate in the study will not have any disadvantages or injury  
12 12 of their prenatal care. On the contrary, they will receive a telephone number to  
13 13 contact the clinical researchers at any time (24/7 service), which enables a closer  
14 14 contact with researchers and providers of care, since the MAES-I team are committed  
15 15 to contacting providers of care if any potential complication is noticed by participants.

16 16 The participating women will not be responsible if loss, theft or damage to the wrist  
17 17 device occurs. However, they will be asked to return the device after they finished the  
18 18 participation in the study, in order to use it for new women entering the study. No self-  
19 19 damage is expected in those who use the device.

20 20 Participating women will not be able to identify any PA or sleep parameters at any  
21 21 stage of the study. The download of the data is only possible through the own licensed  
22 22 software of the device. Actigraphy devices provided for participating women have a  
23 23 unique code which will be recorded in the database together with the interval of use  
24 24 for each women. Actigraphy data will be labelled using participant ID, device number,  
25 25 gestational age when starting using each device and return date of each device. The  
26 26 use of such codes, ID`s and numbers will ensure confidential identify for all  
27 27 participating women. The identity of all women will be kept confidential.

28 28 MAES-I study has been reviewed and approved by the National Committee for Ethics in  
29 29 Research of Brazil (CONEP) and by the Institutional Review Board (IRB) of the  
30 30 coordinating centre (Letter of approval 1.834.116 issued on 24<sup>th</sup> November 2016) and

1 of all other Brazilian participating centres. All women who will be enrolled in the  
2 MAES-I cohort will sign an informed consent form.

3 The ethical principles stated in the Brazilian National Health Council (Resolution CNS  
4 466/12) will be respected in every stage of this study. The anonymity of the source of  
5 information will be guaranteed and the care for the women will be provided  
6 independently of her agreement to participate in the study. The study also complies  
7 with the Declaration of Helsinki amended in Hong Kong in 1989. The methodological  
8 and ethical aspects of MAES-I study protocol were developed following STROBE  
9 guidelines [57].

#### 10 *Patient and Public Involvement*

11 Patients and public were not involved in this study for the development of the  
12 research question and outcome measures. However, the choice for a wrist device was  
13 based on the preference of users as reported. Participants of the study will have access  
14 to the results by its webpage that will be open access.

15 Detailed information of the study is provided in the Brazilian Cohort website  
16 ([www.medscinet.com/samba](http://www.medscinet.com/samba)) and findings will be publicized in scientific literature and  
17 Institutional webpages. We intend to disseminate our findings in scientific peer-  
18 reviewed journal, general free access website, specialists' conferences, and to our  
19 funding agencies.

#### 20 21 **Discussion**

22 The actigraphy is an innovative, non-invasive, non-operator dependent, wearable  
23 technology, which enables the estimative under real life conditions of diverse variables  
24 related to mobility, physical activity, sleep-wake, and circadian cycle patterns.  
25 Actigraph devices show high sensitivity in sleep-wake parameters detection and are  
26 currently highly recommended by the American Sleep Disorder Association for  
27 diagnosis and therapy response of circadian rhythm disorders [27, 28, 58]. Although  
28 some studies show that 7 to 14 days using the actigraph device provides reliable  
29 estimates of physical activity behavior in older adult, it is not absolutely clear how  
30 many days is needed to estimate habitual PA by using the wrist/waist device during

1 pregnancy. In general, it seems to depend mainly on the type of actigraph device,  
2 position of wear and target population [30, 33]. Nevertheless, MAES-I study will  
3 provide sufficient data to assess different patterns along pregnancy.

4 The use of wearable physical activity monitors has grown enormously due to the  
5 interest about the relationship between the pathophysiology of diseases and physical  
6 activity and sleep patterns. A recent study on the use of physical activity monitors in  
7 human physiology research unravels the current and potential uses of actigraph device  
8 as in strategies to promote healthier behaviour or to predict outcomes [59]. The  
9 authors conclude that physical activity monitors, as others new 21<sup>st</sup> century  
10 technologies, have already transformed physiology research, revolutionizing the way  
11 we assess patients and opening new areas of interest. In addition, the use of objectives  
12 measures to evaluate habitual sleep duration and outcomes in pregnancy is critical,  
13 taking into account recent investigations reporting little agreement between objective  
14 and subjective assessments of sleep time [60].

15 Alterations in sleep patterns, as less deep sleep and more nocturnal awakenings, can  
16 be observed in pregnancy as early as 10-12 weeks gestation [61]. Sleep disturbances  
17 during pregnancy have been associated with preterm delivery, gestational  
18 hypertensive disorders, glucose intolerance and increased risk of caesarean delivery  
19 [19]. Shorter night time sleep was also associated with hyperglycemia [62]. Persistent  
20 sleep deficiency is correlated with depressive symptoms and stress perception by  
21 pregnant women [61]. These studies lay correlation between PA patterns and sleep  
22 disturbances determining complications, in a well-established relationship of cause and  
23 consequence, although sometimes it could not be adequately determined due to the  
24 study design [17].

25 In a distinct way, our analysis intends to figure out if the maternal complication could  
26 be identified by physical activity and/or sleep patterns modifications, even during its  
27 pre-clinical period, previous the appearance of clinical signs. Considering the existing  
28 evidence, we speculate that the PA and/or sleep patterns change days or weeks before  
29 the clinical presentation of the complication. In general, the signs and symptoms of  
30 some maternal outcomes are part of the gold-standard criteria for diagnosis (high  
31 blood pressure, proteinuria and/or edema in the case of preeclampsia; premature

1  
2  
3 1 contractions and cervical ripening/dilation in preterm birth; abnormal placental blood  
4 2 flow and insufficient fetal growth in Intrauterine Growth Restriction). We acknowledge  
5 3 the fact that there are potential confounders and limitations in predicting maternal and  
6 4 perinatal complications using PA and sleep patterns estimated by actigraph devices.  
7  
8 5 We expect that our studied population will have different subgroups of women with  
9 6 different risks and associated factors playing a role on maternal complication. It  
10 7 includes obesity, smoking, extremes of age, for instance. None of those factors was  
11 8 considered exclusion criteria and, if possible, we intend to assess subgroup analysis for  
12 9 those maternal subgroups at they might present different PA and sleep patterns.  
13 10 Nonetheless, we decided to perform a pragmatic approach, not excluding such  
14 11 common factor from our sample.

15  
16 12 The use of actigraph device during prenatal visits has a potential to become a new tool  
17 13 to monitor pregnant women, improving maternal health care, identifying altered PA  
18 14 and/or sleep patterns, measured objectively through actigraphy, before the occurrence  
19 15 of those signs and symptoms. Therefore, the focus would be offering new technology  
20 16 to monitor the development of a potential maternal complication. Other positive  
21 17 points of our study are the period of data collection (from 19 weeks till delivery) and  
22 18 the low-risk profile of the cohort. Through which, it would be possible to describe a PA  
23 19 and sleep patterns in a low-risk pregnant population and better interpret actigraphy  
24 20 data among pregnant women. The current clinical and biological predictors for the  
25 21 main maternal complications as preeclampsia, preterm birth, maternal haemorrhage,  
26 22 and gestational diabetes still lack for effective sensitivity and specificity.

27  
28 23 If this is confirmed to be true, an important step will be achieved for a possible  
29 24 introduction of screening non-invasive procedures during prenatal care with the  
30 25 purpose of identifying women at higher risk of developing those conditions. Therefore,  
31 26 they could receive specific orientation on prevention and earlier detection of the onset  
32 27 of condition for taking immediate action to look for professional health care and  
33 28 receiving appropriate interventions, avoiding delays that are the most striking factor  
34 29 for the low quality of care the women usually receive in low and middle-income  
35 30 settings, contributing to the still high burden of maternal morbidity and mortality. If  
36 31 we were successful in identifying such “specific patterns of physical activity and sleep”

1  
2  
3  
4  
5  
6  
7  
8  
9  
10  
11  
12  
13  
14  
15  
16  
17  
18  
19  
20  
21  
22  
23  
24  
25  
26  
27  
28  
29  
30  
31  
32  
33  
34  
35  
36  
37  
38  
39  
40  
41  
42  
43  
44  
45  
46  
47  
48  
49  
50  
51  
52  
53  
54  
55  
56  
57  
58  
59  
60

1 as predictors for pregnancy complications, further validation studies will necessarily be  
2 recommended for assessing its effectiveness for the whole management of such  
3 conditions. Additionally, MAES-I will enable further specific studies among high risk  
4 population and also will help to identify the best gestational age for monitoring, giving  
5 the means to target a specific gestational age interval.

6  
7  
8  
9  
10

For peer review only

## 1 Abbreviations

|                                                     |                                                             |
|-----------------------------------------------------|-------------------------------------------------------------|
| ANC – antenatal care                                | min – minutes                                               |
| BMI – body mass index                               | mg – milligram                                              |
| BP – blood pressure                                 | mL – millilitre                                             |
| CPM – count per minute                              | mmol – millimole                                            |
| dL – decilitre                                      | NICE – National Institute for Health and<br>Care Excellence |
| FAQ – frequently asked questions                    | PA – physical activity                                      |
| h – hour                                            | PI – Principal investigator                                 |
| HDI – human development index                       | SE – sleep efficiency                                       |
| Hz - hertz                                          | SCOPE – SCreening Of Pregnancy Endpoints                    |
| Kg – kilogram                                       | SOL – sleep onset latency                                   |
| L – litre                                           | TST – total nocturnal sleep time                            |
| MAES-I – maternal Actigraphy Exploratory<br>Study I | US – United States                                          |
| MEMS – microelectromechanical                       | USA – United States of America                              |
| MET – metabolic equivalent                          | w – week                                                    |
| METs – metabolic equivalents                        |                                                             |

## Competing interests

The authors declare that they have no competing interests.

## Authors' contributions

All authors contributed to the overall study design and specific methodologies. RTS, JGC, JM, MLC and JPS conceived the study design and wrote the first version of the study protocol. In a first meeting, the protocol was discussed and incorporated suggestions from RBG, FEF, ERF, DFL, JV, RPT and DSS. RTS, JGC, JM, and RBG planned the implementation of the study and developed the necessary material. RTS, JM, MLC and JGC drafted the manuscript that was afterwards revised by all other authors who gave suggestions. All authors discussed and made important contributions to the manuscript, read and approved the final version for submission.

### Acknowledgements

The MAES - I study group also included: Carina B Luiz and Luiza C Brust, School of Medicine, Federal University of Rio Grande do Sul, Porto Alegre, Brazil; Danilo Anacleto and Livia C Nascimento, School of Medicine, Federal University of Pernambuco, Recife, Brazil; Daisy Lucena and Denise Ellen F Cordeiro, School of Medicine, Federal University of Ceará, Fortaleza, Brazil; Mariana B Rogerio, Department of Obstetrics and Gynecology, Jundiaí Medical School, Jundiaí, Brazil.

### Funding

This study was granted by The Bill and Melinda Gates Foundation through the Grand Challenge Exploration program, call 19 (research grant OPP1182749).

For peer review only

## References

1. United Nations Development Programme (UNDP). Sustainable Development Goals. 2015. <http://www.un.org/sustainabledevelopment/health/>. Accessed 27 Apr 2016.
2. WHO, World Health Organization. Global Strategy. Global Strategy for Women's, Children's and Adolescents' Health, 2016 - 2030. 2015. <http://www.who.int/life-course/partners/global-strategy/global-strategy-2016-2030/en/>. Accessed 9 Jul 2016.
3. Pacagnella RC, Cecatti JG, Parpinelli MA, Sousa MH, Haddad SM, Costa ML, et al. Delays in receiving obstetric care and poor maternal outcomes: results from a national multicentre cross-sectional study. *BMC Pregnancy Childbirth*. 2014;14:159.
4. Haddad SM, Cecatti JG, Souza JP, Sousa MH, Parpinelli MA, Costa ML, et al. Applying the maternal near miss approach for the evaluation of quality of obstetric care: a worked example from a Multicenter Surveillance Study. *Biomed Res Int*. 2014;2014:989815.
5. Pacagnella RC, Cecatti JG, Osis MJ, Souza JP. The role of delays in severe maternal morbidity and mortality: expanding the conceptual framework. *Reprod Health Matters*. 2012;20:155–63.
6. Vogel JP, Souza JP, Mori R, Morisaki N, Lumbiganon P, Laopaiboon M, et al. Maternal complications and perinatal mortality: findings of the World Health Organization Multicountry Survey on Maternal and Newborn Health. *BJOG*. 2014;121 Suppl:76–88.
7. Souza JP, Gülmezoglu AM, Vogel J, Carroli G, Lumbiganon P, Qureshi Z, et al. Moving beyond essential interventions for reduction of maternal mortality (the WHO Multicountry Survey on Maternal and Newborn Health): a cross-sectional study. *Lancet*. 2013;381:1747–55.
8. Brosens I, Pijnenborg R, Vercruyse L, Romero R. The “Great Obstetrical Syndromes” are associated with disorders of deep placentation. *Am J Obstet Gynecol*. 2011;204:193–201.
9. Di Renzo GC. The great obstetrical syndromes. *J Matern neonatal Med*. 2009;22:633–5.
10. Loprinzi PD. The effects of objectively-measured, free-living daily ambulatory movement on mortality in a national sample of adults with diabetes. *Physiol Behav*. 2016;154:126–8.
11. Biswas A, Oh PI, Faulkner GE, Bajaj RR, Silver MA, Mitchell MS, et al. Sedentary Time and Its Association With Risk for Disease Incidence, Mortality, and Hospitalization in Adults. *Ann Intern Med*. 2015;162:123.
12. Hardin PE. From biological clock to biological rhythms. *Genome Biol*. 2000;1:reviews1023.1-1023.5.
13. Kizaki T, Sato S, Shirato K, Sakurai T, Ogasawara J, Izawa T, et al. Effect of Circadian Rhythm on Clinical and Pathophysiological Conditions and Inflammation. *Crit Rev Immunol*. 2015;35:261–75.
14. Baron KG, Reid KJ. Circadian misalignment and health. *Int Rev Psychiatry*. 2014;26:139–54.
15. Leproult R, Holmbäck U, Van Cauter E, McMenemy T, Suwazono Y, Dochi M, et al. Circadian misalignment augments markers of insulin resistance and inflammation,



- 1  
2  
3 independently of sleep loss. *Diabetes*. 2014;63:1860–9.
- 4 16. Diem SJ, Blackwell TL, Stone KL, Yaffe K, Tranah G, Cauley JA, et al. Measures  
5 of Sleep-Wake Patterns and Risk of Mild Cognitive Impairment or Dementia in Older  
6 Women. *Am J Geriatr Psychiatry*. 2016;24:248–58.
- 7  
8 17. Haney A, Buysse DJ, Rosario BL, Chen Y-F, Okun ML. Sleep disturbance and  
9 cardiometabolic risk factors in early pregnancy: a preliminary study. *Sleep Med*.  
10 2014;15:444–50.
- 11  
12 18. Lynch BM, Boyle T, Winkler E, Occleston J, Courneya KS, Vallance JK. Patterns  
13 and correlates of accelerometer-assessed physical activity and sedentary time among  
14 colon cancer survivors. *Cancer Causes Control*. 2016;27:59–68.
- 15  
16 19. Palagini L, Gemignani A, Banti S, Manconi M, Mauri M, Riemann D. Chronic sleep  
17 loss during pregnancy as a determinant of stress: impact on pregnancy outcome. *Sleep*  
18 *Med*. 2014;15:853–9.
- 19  
20 20. Tsai S-Y, Lin J-W, Wu W-W, Lee C-N, Lee P-L. Sleep Disturbances and  
21 Symptoms of Depression and Daytime Sleepiness in Pregnant Women. *Birth*.  
22 2016;43:176–83.
- 23  
24 21. Tsai S-Y, Lee P-L, Lin J-W, Lee C-N. Cross-sectional and Longitudinal  
25 Associations between Sleep and Health-related Quality of Life in Pregnant Women: a  
26 Prospective Observational Study. *Int J Nurs Stud*. 2016;56:45–53.
- 27  
28 22. Hayase M, Shimada M, Seki H. Sleep quality and stress in women with pregnancy-  
29 induced hypertension and gestational diabetes mellitus. *Women Birth*. 2014;27:190–5.
- 30  
31 23. Mindell JA, Cook RA, Nikolovski J. Sleep patterns and sleep disturbances across  
32 pregnancy. *Sleep Med*. 2015;16:483–8.
- 33  
34 24. JOHN D, FREEDSON P. ActiGraph and Actical Physical Activity Monitors. *Med*  
35 *Sci Sport Exerc*. 2012;44 1 Suppl 1:S86–9.
- 36  
37 25. Martin JL, Hakim AD. Wrist actigraphy. *Chest*. 2011;139:1514–27.
- 38  
39 26. Wood AC, Kuntsi J, Asherson P, Saudino KJ. Actigraph data are reliable, with  
40 functional reliability increasing with aggregation. *Behav Res Methods*. 2008;40:873–8.
- 41  
42 27. Morgenthaler TI, Lee-Chiong T, Alessi C, Friedman L, Aurora RN, Boehlecke B, et  
43 al. Practice parameters for the clinical evaluation and treatment of circadian rhythm  
44 sleep disorders. An American Academy of Sleep Medicine report. *Sleep*.  
45 2007;30:1445–59.
- 46  
47 28. Sadeh A. The role and validity of actigraphy in sleep medicine: an update. *Sleep*  
48 *Med Rev*. 2011;15:259–67.
- 49  
50 29. Sani M, Refinetti R, Jean-Louis G, Pandi-Perumal SR, Durazo-Arvizu RA, Dugas  
51 LR, et al. Daily activity patterns of 2316 men and women from five countries differing  
52 in socioeconomic development. *Chronobiol Int*. 2015;32:650–6.
- 53  
54 30. Hart TL, Swartz AM, Cashin SE, Strath SJ. How many days of monitoring predict  
55 physical activity and sedentary behaviour in older adults? *Int J Behav Nutr Phys Act*.  
56 2011;8:62.
- 57  
58 31. Falck RS, Landry GJ, Brazendale K, Liu-Ambrose T. Measuring Physical Activity  
59 in Older Adults Using MotionWatch 8© Actigraphy: How Many Days are Needed? *J*  
60 *Aging Phys Act*. 2016.

- 1  
2  
3 32. Dillon CB, Fitzgerald AP, Kearney PM, Perry IJ, Rennie KL, Kozarski R, et al.  
4 Number of Days Required to Estimate Habitual Activity Using Wrist-Worn  
5 GENEActiv Accelerometer: A Cross-Sectional Study. *PLoS One*. 2016;11:e0109913.  
6  
7 33. Trost SG, Zheng Y, Wong W-K. Machine learning for activity recognition: hip  
8 versus wrist data. *Physiol Meas*. 2014;35:2183–9.  
9  
10 34. Ellis K, Kerr J, Godbole S, Staudenmayer J, Lanckriet G. Hip and Wrist  
11 Accelerometer Algorithms for Free-Living Behavior Classification. *Med Sci Sports  
12 Exerc*. 2016;48:933–40.  
13  
14 35. Rowlands A V, Cliff DP, Fairclough SJ, Boddy LM, Olds TS, Parfitt G, et al.  
15 Moving Forward with Backward Compatibility: Translating Wrist Accelerometer Data.  
16 *Med Sci Sports Exerc*. 2016.  
17  
18 36. Koster A, Shiroma EJ, Caserotti P, Matthews CE, Chen KY, Glynn NW, et al.  
19 Comparison of Sedentary Estimates between activPAL and Hip- and Wrist-Worn  
20 ActiGraph. *Med Sci Sports Exerc*. 2016;48:1514–22.  
21  
22 37. Haddad SM, Cecatti JG, Parpinelli MA, Souza JP, Costa ML, Sousa MH, et al.  
23 From planning to practice: building the national network for the Surveillance of Severe  
24 Maternal Morbidity. *BMC Public Health*. 2011;11:283.  
25  
26 38. Fisher M. A revealing map of the world's most and least ethnically diverse  
27 countries. *Washington Post*. 2013.  
28 [http://www.washingtonpost.com/blogs/worldviews/wp/2013/05/16/a-revealing-map-of-](http://www.washingtonpost.com/blogs/worldviews/wp/2013/05/16/a-revealing-map-of-the-worlds-most-and-least-ethnically-diverse-countries)  
29 [the-worlds-most-and-least-ethnically-diverse-countries](http://www.washingtonpost.com/blogs/worldviews/wp/2013/05/16/a-revealing-map-of-the-worlds-most-and-least-ethnically-diverse-countries). Accessed 25 Jul 2016.  
30  
31 39. United Nations Development Programme (UNDP). Human Development Index  
32 (HDI). Brazil. 2010. <http://www.pnud.org.br/Atlas.aspx>.  
33  
34 40. Wu J, Sigmund CD. Hypertension: A Disease That Strikes Around the Clock.  
35 *Hypertension*. 2016;67:493–5.  
36  
37 41. Danilack VA, Nunes AP, Phipps MG. Unexpected complications of low-risk  
38 pregnancies in the United States. *Am J Obstet Gynecol*. 2015;212:809.e1-809.e6.  
39  
40 42. Luft CDB, Sanches S de O, Mazo GZ, Andrade A. [Brazilian version of the  
41 Perceived Stress Scale: translation and validation for the elderly]. *Rev Saude Publica*.  
42 2007;41:606–15.  
43  
44 43. Pesce RP, Assis SG, Avanci JQ, Santos NC, Malaquias J V, Carvalhaes R. [Cross-  
45 cultural adaptation, reliability and validity of the resilience scale]. *Cad Saude Publica*.  
46 21:436–48.  
47  
48 44. Passini R, Cecatti JG, Lajos GJ, Tedesco RP, Nomura ML, Dias TZ, et al. Brazilian  
49 Multicentre Study on Preterm Birth (EMIP): Prevalence and Factors Associated with  
50 Spontaneous Preterm Birth. *PLoS One*. 2014;9:e109069.  
51  
52 45. Lisonkova S, Joseph KS. Incidence of preeclampsia: risk factors and outcomes  
53 associated with early- versus late-onset disease. *Am J Obstet Gynecol*.  
54 2013;209:544.e1-544.e12.  
55  
56 46. Belton S, O'Brien W, Wickel EE, Issartel J. Patterns of noncompliance in  
57 adolescent field-based accelerometer research. *J Phys Act Health*. 2013;10:1181–5.  
58  
59 47. Ellis K, Kerr J, Godbole S, Lanckriet G, Wing D, Marshall S, et al. A random forest  
60 classifier for the prediction of energy expenditure and type of physical activity from  
wrist and hip accelerometers. *Physiol Meas*. 2014;35:2191–203.

- 1  
2  
3 48. Staudenmayer J, He S, Hickey A, Sasaki J, Freedson P. Methods to estimate aspects  
4 of physical activity and sedentary behavior from high-frequency wrist accelerometer  
5 measurements. *J Appl Physiol*. 2015;119.
- 6 49. Kamada M, Shiroma EJ, Harris TB, Lee I-M. Comparison of physical activity  
7 assessed using hip- and wrist-worn accelerometers. *Gait Posture*. 2016;44:23–8.
- 8 50. Freedson PS, Melanson E, Sirard J. Calibration of the Computer Science and  
9 Applications, Inc. accelerometer. *Med Sci Sports Exerc*. 1998;30:777–81.
- 10 51. Tranquilli AL, Dekker G, Magee L, Roberts J, Sibai BM, Steyn W, et al. The  
11 classification, diagnosis and management of the hypertensive disorders of pregnancy: A  
12 revised statement from the ISSHP. *Pregnancy Hypertens*. 2014;4:97–104.
- 13 52. WHO recommendations on antenatal care for a positive pregnancy experience.  
14 World Health Organization. 2016.  
15 [http://www.who.int/reproductivehealth/publications/maternal\\_perinatal\\_health/anc-](http://www.who.int/reproductivehealth/publications/maternal_perinatal_health/anc-positive-pregnancy-experience/en/)  
16 [positive-pregnancy-experience/en/](http://www.who.int/reproductivehealth/publications/maternal_perinatal_health/anc-positive-pregnancy-experience/en/).
- 17 53. North RA, McCowan LME, Dekker GA, Poston L, Chan EHY, Stewart AW, et al.  
18 Clinical risk prediction for pre-eclampsia in nulliparous women: development of model  
19 in international prospective cohort. *BMJ*. 2011;342:d1875.
- 20 54. Murphy NM, McCarthy FP, Khashan AS, Myers JE, Simpson NAB, Kearney PM,  
21 et al. Compliance with National Institute of Health and Care Excellence risk-based  
22 screening for Gestational Diabetes Mellitus in nulliparous women. *Eur J Obstet*  
23 *Gynecol Reprod Biol*. 2016;199:60–5.
- 24 55. McCowan LME, Roberts CT, Dekker GA, Taylor RS, Chan EHY, Kenny LC, et al.  
25 Risk factors for small-for-gestational-age infants by customised birthweight centiles:  
26 data from an international prospective cohort study. *BJOG*. 2010;117:1599–607.
- 27 56. Thaddeus S, Maine D. Too far to walk: maternal mortality in context. *Soc Sci Med*.  
28 1994;38:1091–110.
- 29 57. von Elm E, Altman DG, Egger M, Pocock SJ, Gøtzsche PC, Vandenbroucke JP. The  
30 Strengthening the Reporting of Observational Studies in Epidemiology (STROBE)  
31 statement: guidelines for reporting observational studies. *PLoS Med*. 2007;4:e296.
- 32 58. Huberty J, Ehlers DK, Kurka J, Ainsworth B, Buman M, Gangwisch J, et al.  
33 Feasibility of three wearable sensors for 24 hour monitoring in middle-aged women.  
34 *BMC Womens Health*. 2015;15:55.
- 35 59. Wright SP, Hall Brown TS, Collier SR, Sandberg K. How consumer physical  
36 activity monitors could transform human physiology research. *Am J Physiol Regul*  
37 *Integr Comp Physiol*. 2017;:ajpregu.00349.2016.
- 38 60. Herring SJ, Foster GD, Pien GW, Massa K, Nelson DB, Gehrman PR, et al. Do  
39 pregnant women accurately report sleep time? A comparison between self-reported and  
40 objective measures of sleep duration in pregnancy among a sample of urban mothers.  
41 *Sleep Breath*. 2013;17:1323–7.
- 42 61. Okun ML, Kline CE, Roberts JM, Wettlaufer B, Glover K, Hall M. Prevalence of  
43 sleep deficiency in early gestation and its associations with stress and depressive  
44 symptoms. *J women's Heal*. 2013;22:1028–37.
- 45 62. Herring SJ, Nelson DB, Pien GW, Homko C, Goetzl LM, Davey A, et al.  
46 Objectively measured sleep duration and hyperglycemia in pregnancy. *Sleep Med*.

1  
2  
3 2014;15:51–5.  
4  
5  
6  
7  
8  
9  
10  
11  
12  
13  
14  
15  
16  
17  
18  
19  
20  
21  
22  
23  
24  
25  
26  
27  
28  
29  
30  
31  
32  
33  
34  
35  
36  
37  
38  
39  
40  
41  
42  
43  
44  
45  
46  
47  
48  
49  
50  
51  
52  
53  
54  
55  
56  
57  
58  
59  
60

For peer review only

**Table 1.** Participating centers in the Maternal Actigraphy Exploratory Study I (MAES-I)

|                                                                                                                                                                                                                                                           |
|-----------------------------------------------------------------------------------------------------------------------------------------------------------------------------------------------------------------------------------------------------------|
| <ul style="list-style-type: none"><li>• The Maternity of CAISM, University of Campinas, in Campinas, SP, Brazil;<ul style="list-style-type: none"><li>○ Local Principal Investigator: Maria Laura Costa.</li></ul></li></ul>                              |
| <ul style="list-style-type: none"><li>• Maternity of the Clinic Hospital, Federal University of RS, Porto Alegre, RS, Brazil;<ul style="list-style-type: none"><li>○ Local Principal Investigator: Janete Vettorazzi.</li></ul></li></ul>                 |
| <ul style="list-style-type: none"><li>• Maternity of the University Hospital, Jundiaí Medical School in Jundiaí, SP, Brazil;<ul style="list-style-type: none"><li>○ Local Principal Investigator: Ricardo Porto Tedesco.</li></ul></li></ul>              |
| <ul style="list-style-type: none"><li>• Maternity of Clinic Hospital, Federal University of Pernambuco, in Recife, PE, Brazil;<ul style="list-style-type: none"><li>○ Local Principal Investigator: Edilberto A Rocha Filho.</li></ul></li></ul>          |
| <ul style="list-style-type: none"><li>• MEAC – School Maternity of the Federal University of Ceará, in Fortaleza, CE, Brazil.<ul style="list-style-type: none"><li>○ Local Principal Investigator: Francisco Edson de Lucena Feitosa.</li></ul></li></ul> |

**Table 2.** Inclusion and Exclusion Criteria of MAES – I

| Inclusion Criteria                                                                                                                                                                                                                                                                                                                                                                                                                                                                                                                                                                                                                                                                               |                                                                                                                                                                                                                                                                                                                                                                                                                                                                                                                                                                                                     |
|--------------------------------------------------------------------------------------------------------------------------------------------------------------------------------------------------------------------------------------------------------------------------------------------------------------------------------------------------------------------------------------------------------------------------------------------------------------------------------------------------------------------------------------------------------------------------------------------------------------------------------------------------------------------------------------------------|-----------------------------------------------------------------------------------------------------------------------------------------------------------------------------------------------------------------------------------------------------------------------------------------------------------------------------------------------------------------------------------------------------------------------------------------------------------------------------------------------------------------------------------------------------------------------------------------------------|
| <ul style="list-style-type: none"> <li>• Singleton pregnancy</li> <li>• Nulliparous (who had never given birth before)</li> <li>• Between 19+0 – 21+0 weeks of gestation</li> </ul>                                                                                                                                                                                                                                                                                                                                                                                                                                                                                                              |                                                                                                                                                                                                                                                                                                                                                                                                                                                                                                                                                                                                     |
| Exclusion Criteria                                                                                                                                                                                                                                                                                                                                                                                                                                                                                                                                                                                                                                                                               |                                                                                                                                                                                                                                                                                                                                                                                                                                                                                                                                                                                                     |
| <ul style="list-style-type: none"> <li>• Unsure LMP and unwilling to have to date the Ultrasound</li> <li>• <math>\geq 3</math> Miscarriages</li> <li>• Major Fetal Anomaly/Abnormal Karyotype*</li> <li>• Essential Hypertension Treated Pre-pregnancy</li> <li>• Mod-Severe Hypertension at booking (<math>\geq 160/100</math> mmHg) or Chronic hypertension using antihypertensive medication</li> <li>• Pre-pregnancy Diabetes</li> <li>• Renal Disease</li> <li>• Systemic Lupus Erythematosus</li> <li>• Anti-phospholipid Syndrome</li> <li>• Sickle Cell Disease</li> <li>• HIV or Hep B or Hep C positive</li> <li>• Any condition that limits practice of physical activity</li> </ul> | <ul style="list-style-type: none"> <li>• Major Uterine Anomaly</li> <li>• Cervical Suture</li> <li>• Knife cone biopsy</li> <li>• Ruptured membranes</li> <li>• Use of long-term steroids</li> <li>• Use of Low-dose Aspirin</li> <li>• Use of Calcium (<math>&gt; 1g/24h</math>)</li> <li>• Use of Eicosapentaenoic acid (fish oil) <math>&gt; 2,7g</math></li> <li>• Use of Vit. C <math>\geq 1000mg</math> &amp; Vit. E <math>\geq 400</math> UI</li> <li>• Use of Heparin/LMW Heparin</li> <li>• Untreated Thyroid disease</li> <li>• Use of antidepressant and/or anxiolytic agents</li> </ul> |

\* All information regarding fetal anomalies will be properly recorded

1  
2  
3  
4  
5  
6  
7  
8  
9  
10  
11  
12  
13  
14  
15  
16  
17  
18  
19  
20  
21  
22  
23  
24  
25  
26  
27  
28  
29  
30  
31  
32  
33  
34  
35  
36  
37  
38  
39  
40  
41  
42  
43  
44  
45  
46  
47  
48  
49  
50  
51  
52  
53  
54  
55  
56  
57  
58  
59  
60

**Table 3.** Measurement frequency and maximum return periods according to gestational age – MAES I

| Gestational age | Measurement frequency | Maximum return period (weeks) |
|-----------------|-----------------------|-------------------------------|
| 19 – 32 weeks   | 20Hz                  | 4                             |
| 33 – 36 weeks   | 30Hz                  | 2                             |
| 37 – 42 weeks   | 50Hz                  | 1                             |

For peer review only

**Table 4.** Performance of wrist and hip actigraphy methods according to different activities

|                 | Hip   |       |       | Wrist |       |       |
|-----------------|-------|-------|-------|-------|-------|-------|
|                 | Sens  | Spec  | BA    | Sens  | Spec  | BA    |
| Sitting         | 0.894 | 0.923 | 0.908 | 0.883 | 0.870 | 0.876 |
| Vehicle         | 0.870 | 0.987 | 0.929 | 0.823 | 0.964 | 0.893 |
| Walking/running | 0.687 | 0.981 | 0.834 | 0.574 | 0.983 | 0.779 |
| Standing        | 0.797 | 0.929 | 0.851 | 0.687 | 0.904 | 0.795 |
| Average         | 0.812 | 0.955 | 0.881 | 0.742 | 0.930 | 0.836 |

BA: balanced accuracy; sens: sensitivity; spec: specificity

**Adapted from** Ellis K *et al.* Hip and Wrist Accelerometer Algorithms for Free-Living Behavior Classification. *Med. Sci. Sports Exerc.* 2016.



**Table 5.** Severe Neonatal Morbidity definition according to term/preterm status

| <b>Preterm</b>                                                                           | <b>Term</b>                                     |
|------------------------------------------------------------------------------------------|-------------------------------------------------|
| Grade III and IV intraventricular haemorrhage                                            | Grade II or III hypoxic ischemic encephalopathy |
| Chronic lung disease (home on O <sub>2</sub> or on O <sub>2</sub> at 36 weeks gestation) | Ventilation>24 hours                            |
| Necrotizing enterocolitis                                                                | Neonatal intensive care admission >4 days       |
| Retinopathy of prematurity, stage 3 or 4                                                 | Apgar score <4 at 5 mins                        |
| Sepsis (blood or CSF culture proven)                                                     | Cord arterial pH<7.0 and/or base excess>-15     |
| Cystic peri-ventricular leukomalacia                                                     | Neonatal seizures                               |

1  
2  
3 **Figure legends:**  
4  
5

6 **Figure 1.** Set points of MAES-I study

7  
8 **Figure 2.** Estimated prevalence of preterm birth and preeclampsia according to  
9 gestational age (RED represents majority of cases) and period of evaluation of PA and  
10 sleep patterns (in GREY)  
11  
12  
13  
14  
15  
16  
17  
18  
19  
20  
21  
22  
23  
24  
25  
26  
27  
28  
29  
30  
31  
32  
33  
34  
35  
36  
37  
38  
39  
40  
41  
42  
43  
44  
45  
46  
47  
48  
49  
50  
51  
52  
53  
54  
55  
56  
57  
58  
59  
60

For peer review only

1  
2  
3  
4  
5  
6  
7  
8  
9  
10  
11  
12  
13  
14  
15  
16  
17  
18  
19  
20  
21  
22  
23  
24  
25  
26  
27  
28  
29  
30  
31  
32  
33  
34  
35  
36  
37  
38  
39  
40  
41  
42  
43  
44  
45  
46  
47  
48  
49  
50  
51  
52  
53  
54  
55  
56  
57  
58  
59  
60

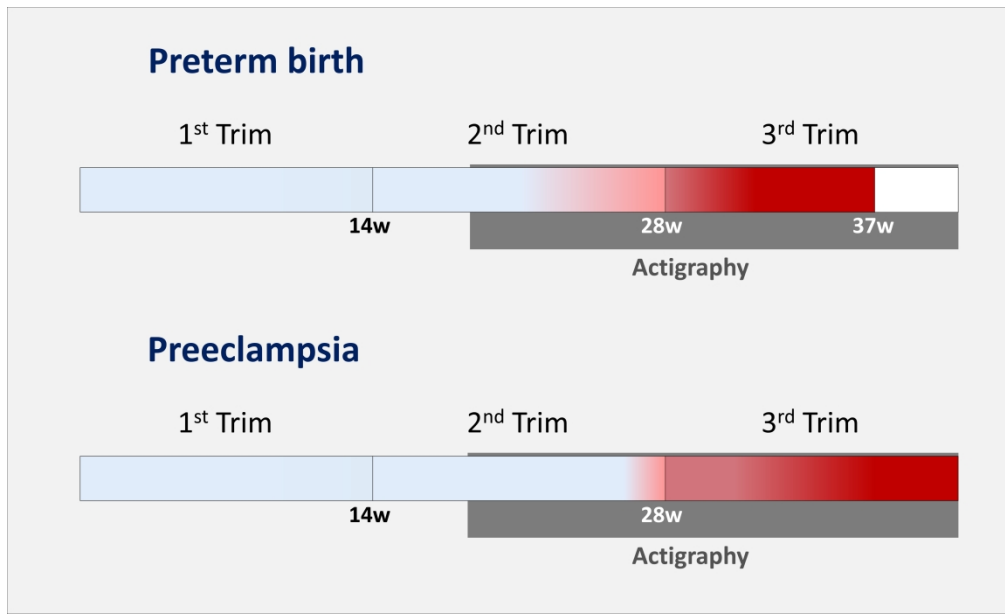

Figure 1

402x244mm (300 x 300 DPI)

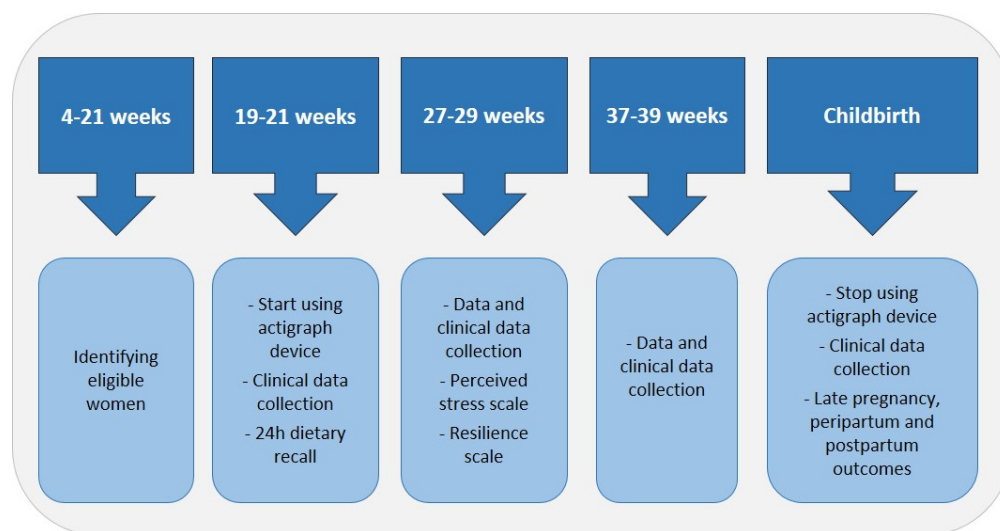

Figure 2

90x47mm (300 x 300 DPI)

**STROBE 2007 (v4) checklist of items to be included in reports of observational studies in epidemiology\***  
**Checklist for cohort, case-control, and cross-sectional studies (combined)**

| Section/Topic             | Item # | Recommendation                                                                                                                                                                                                                                                                                                          | Reported on page # |
|---------------------------|--------|-------------------------------------------------------------------------------------------------------------------------------------------------------------------------------------------------------------------------------------------------------------------------------------------------------------------------|--------------------|
| Title and abstract        | 1      | (a) Indicate the study's design with a commonly used term in the title or the abstract                                                                                                                                                                                                                                  | 1,2                |
|                           |        | (b) Provide in the abstract an informative and balanced summary of what was done and what was found                                                                                                                                                                                                                     | 2                  |
| <b>Introduction</b>       |        |                                                                                                                                                                                                                                                                                                                         |                    |
| Background/rationale      | 2      | Explain the scientific background and rationale for the investigation being reported                                                                                                                                                                                                                                    | 4-6                |
| Objectives                | 3      | State specific objectives, including any pre-specified hypotheses                                                                                                                                                                                                                                                       | 6                  |
| <b>Methods</b>            |        |                                                                                                                                                                                                                                                                                                                         |                    |
| Study design              | 4      | Present key elements of study design early in the paper                                                                                                                                                                                                                                                                 | 1,2,7              |
| Setting                   | 5      | Describe the setting, locations, and relevant dates, including periods of recruitment, exposure, follow-up, and data collection                                                                                                                                                                                         | 7                  |
| Participants              | 6      | (a) <i>Case-control study</i> —Give the eligibility criteria, and the sources and methods of case ascertainment and control selection. Give the rationale for the choice of cases and controls<br><i>Cross-sectional study</i> —Give the eligibility criteria, and the sources and methods of selection of participants | 7,8                |
|                           |        | (b) <i>Case-control study</i> —For matched studies, give matching criteria and the number of controls per case                                                                                                                                                                                                          |                    |
| Variables                 | 7      | Clearly define all outcomes, exposures, predictors, potential confounders, and effect modifiers. Give diagnostic criteria, if applicable                                                                                                                                                                                | 11-15              |
| Data sources/ measurement | 8*     | For each variable of interest, give sources of data and details of methods of assessment (measurement). Describe comparability of assessment methods if there is more than one group                                                                                                                                    | 11-15              |
| Bias                      | 9      | Describe any efforts to address potential sources of bias                                                                                                                                                                                                                                                               | 16,17              |
| Study size                | 10     | Explain how the study size was arrived at                                                                                                                                                                                                                                                                               | 15                 |
| Quantitative variables    | 11     | Explain how quantitative variables were handled in the analyses. If applicable, describe which groupings were chosen and why                                                                                                                                                                                            | 13                 |
| Statistical methods       | 12     | (a) Describe all statistical methods, including those used to control for confounding                                                                                                                                                                                                                                   | 16,17              |
|                           |        | (b) Describe any methods used to examine subgroups and interactions                                                                                                                                                                                                                                                     | 16,17              |
|                           |        | (c) Explain how missing data were addressed                                                                                                                                                                                                                                                                             | 17                 |
|                           |        | (d) <i>Case-control study</i> —If applicable, explain how matching of cases and controls was addressed<br><i>Cross-sectional study</i> —If applicable, describe analytical methods taking account of sampling strategy                                                                                                  | n/a                |
|                           |        | (e) Describe any sensitivity analyses                                                                                                                                                                                                                                                                                   | n/a                |
| <b>Results</b>            |        |                                                                                                                                                                                                                                                                                                                         |                    |

|                          |     |                                                                                                                                                                                                                                                                                                                                                                                                               |       |
|--------------------------|-----|---------------------------------------------------------------------------------------------------------------------------------------------------------------------------------------------------------------------------------------------------------------------------------------------------------------------------------------------------------------------------------------------------------------|-------|
| Participants             | 13* | (a) Report numbers of individuals at each stage of study—eg numbers potentially eligible, examined for eligibility, confirmed eligible, included in the study, completing follow-up, and analysed<br>(b) Give reasons for non-participation at each stage<br>(c) Consider use of a flow diagram                                                                                                               | n/a   |
|                          |     |                                                                                                                                                                                                                                                                                                                                                                                                               | n/a   |
| Descriptive data         | 14* | (a) Give characteristics of study participants (eg demographic, clinical, social) and information on exposures and potential confounders<br>(b) Indicate number of participants with missing data for each variable of interest                                                                                                                                                                               | 7,8   |
|                          |     |                                                                                                                                                                                                                                                                                                                                                                                                               | n/a   |
| Outcome data             | 15* | <i>Case-control study</i> —Report numbers in each exposure category, or summary measures of exposure<br><i>Cross-sectional study</i> —Report numbers of outcome events or summary measures                                                                                                                                                                                                                    | n/a   |
|                          |     |                                                                                                                                                                                                                                                                                                                                                                                                               | n/a   |
| Main results             | 16  | (a) Give unadjusted estimates and, if applicable, confounder-adjusted estimates and their precision (eg, 95% confidence interval). Make clear which confounders were adjusted for and why they were included<br>(b) Report category boundaries when continuous variables were categorized<br>(c) If relevant, consider translating estimates of relative risk into absolute risk for a meaningful time period | n/a   |
|                          |     |                                                                                                                                                                                                                                                                                                                                                                                                               | n/a   |
| Other analyses           | 17  | Report other analyses done—eg analyses of subgroups and interactions, and sensitivity analyses                                                                                                                                                                                                                                                                                                                | 17    |
| <b>Discussion</b>        |     |                                                                                                                                                                                                                                                                                                                                                                                                               |       |
| Key results              | 18  | Summarise key results with reference to study objectives                                                                                                                                                                                                                                                                                                                                                      | n/a   |
| Limitations              | 19  | Discuss limitations of the study, taking into account sources of potential bias or imprecision. Discuss both direction and magnitude of any potential bias                                                                                                                                                                                                                                                    | 21    |
| Interpretation           | 20  | Give a cautious overall interpretation of results considering objectives, limitations, multiplicity of analyses, results from similar studies, and other relevant evidence                                                                                                                                                                                                                                    | 19-21 |
| Generalisability         | 21  | Discuss the generalisability (external validity) of the study results                                                                                                                                                                                                                                                                                                                                         | 21    |
| <b>Other information</b> |     |                                                                                                                                                                                                                                                                                                                                                                                                               |       |
| Funding                  | 22  | Give the source of funding and the role of the funders for the present study and, if applicable, for the original study on which the present article is based                                                                                                                                                                                                                                                 | 24    |

\*Give information separately for cases and controls in case-control studies and, if applicable, for exposed and unexposed groups in cohort and cross-sectional studies.

**Note:** An Explanation and Elaboration article discusses each checklist item and gives methodological background and published examples of transparent reporting. The STROBE checklist is best used in conjunction with this article (freely available on the Web sites of PLoS Medicine at <http://www.plosmedicine.org/>, Annals of Internal Medicine at <http://www.annals.org/>, and Epidemiology at <http://www.epidem.com/>). Information on the STROBE Initiative is available at [www.strobe-statement.org](http://www.strobe-statement.org).

# BMJ Open

## The identification of earlier predictors of pregnancy complications through wearable technologies in a Brazilian multicenter cohort: Maternal Actigraphy Exploratory Study I (MAES-I) study protocol

|                                 |                                                                                                                                                                                                                                                                                                                                                                                                                                                                                                                                                                                                                                                                                                                                                                                                                                                                                                                                                                                                                               |
|---------------------------------|-------------------------------------------------------------------------------------------------------------------------------------------------------------------------------------------------------------------------------------------------------------------------------------------------------------------------------------------------------------------------------------------------------------------------------------------------------------------------------------------------------------------------------------------------------------------------------------------------------------------------------------------------------------------------------------------------------------------------------------------------------------------------------------------------------------------------------------------------------------------------------------------------------------------------------------------------------------------------------------------------------------------------------|
| Journal:                        | <i>BMJ Open</i>                                                                                                                                                                                                                                                                                                                                                                                                                                                                                                                                                                                                                                                                                                                                                                                                                                                                                                                                                                                                               |
| Manuscript ID                   | bmjopen-2018-023101.R2                                                                                                                                                                                                                                                                                                                                                                                                                                                                                                                                                                                                                                                                                                                                                                                                                                                                                                                                                                                                        |
| Article Type:                   | Protocol                                                                                                                                                                                                                                                                                                                                                                                                                                                                                                                                                                                                                                                                                                                                                                                                                                                                                                                                                                                                                      |
| Date Submitted by the Author:   | 23-Dec-2018                                                                                                                                                                                                                                                                                                                                                                                                                                                                                                                                                                                                                                                                                                                                                                                                                                                                                                                                                                                                                   |
| Complete List of Authors:       | Souza, Renato; Universidade Estadual de Campinas, Obstetrics and Gynecology<br>Cecatti, Jose; University of Campinas, Obstetrics and Gynecology<br>Mayrink, Jussara; Universidade Estadual de Campinas Faculdade de Ciencias Medicas<br>Galvão, Rafael; Universidade Estadual de Campinas, Obstetrics and Gynecology<br>Costa, Maria Laura; Universidade Estadual de Campinas, Obstetrics and Gynecology<br>Feitosa, Francisco; Universidade Federal do Ceara, Maternidade Escola Rocha Filho, Edilberto; Universidade Federal de Pernambuco, Obstetrics and Gynecology<br>Leite, Debora; Universidade Federal de Pernambuco, Obstetrics and Gynecology<br>Vettorazzi, Janete; Universidade Federal do Rio Grande do Sul, Obstetrics and Gynecology<br>Tedesco, Ricardo; School of Medicine of Jundiai, Obstetrics and Gynecology<br>Santana, Danielly; Universidade Estadual de Campinas, Obstetrics and Gynecology<br>Souza, Joao Paulo; Universidade de Sao Paulo Faculdade de Medicina de Ribeirao Preto, Social Medicine |
| <b>Primary Subject Heading</b>: | Obstetrics and gynaecology                                                                                                                                                                                                                                                                                                                                                                                                                                                                                                                                                                                                                                                                                                                                                                                                                                                                                                                                                                                                    |
| Secondary Subject Heading:      | Obstetrics and gynaecology                                                                                                                                                                                                                                                                                                                                                                                                                                                                                                                                                                                                                                                                                                                                                                                                                                                                                                                                                                                                    |
| Keywords:                       | wearable technologies, actigraph, physical activity, sleep patterns, pregnancy complications                                                                                                                                                                                                                                                                                                                                                                                                                                                                                                                                                                                                                                                                                                                                                                                                                                                                                                                                  |
|                                 |                                                                                                                                                                                                                                                                                                                                                                                                                                                                                                                                                                                                                                                                                                                                                                                                                                                                                                                                                                                                                               |

SCHOLARONE™  
Manuscripts

1  
2  
3  
4  
5  
6  
7  
8  
9  
10  
11  
12  
13  
14  
15  
16  
17  
18  
19  
20  
21  
22  
23  
24  
25  
26  
27  
28  
29  
30  
31  
32  
33  
34  
35  
36  
37  
38  
39  
40  
41  
42  
43  
44  
45  
46  
47  
48  
49  
50  
51  
52  
53  
54  
55  
56  
57  
58  
59  
60



## STUDY PROTOCOL

# The identification of earlier predictors of pregnancy complications through wearable technologies in a Brazilian multicenter cohort: Maternal Actigraphy Exploratory Study I (MAES-I) study protocol

Renato T. Souza <sup>1</sup>, Jose G. Cecatti <sup>1#</sup>, Jussara Mayrink <sup>1</sup>, Rafael B. Galvao <sup>1</sup>, Maria L. Costa <sup>1</sup>, Francisco E. Feitosa <sup>2</sup>, Edilberto A Rocha Filho <sup>3</sup>, Débora F Leite <sup>1,3</sup>, Janete Vettorazzi <sup>4</sup>, Ricardo P Tedesco <sup>5</sup>, Danielly S Santana <sup>1,5</sup>, Joao P. Souza <sup>6</sup>, for the MAES-I Study Group\*

### Affiliations

<sup>1</sup> Department of Obstetrics and Gynecology, University of Campinas (UNICAMP) School of Medical Sciences, Campinas, SP, Brazil

<sup>2</sup> MEAC – School Maternity of the Federal University of Ceará, in Fortaleza, CE, Brazil

<sup>3</sup> Department of Maternal and Child Health, Maternity of Clinic Hospital, Federal University of Pernambuco, in Recife, PE, Brazil

<sup>4</sup> Department of Obstetrics and Gynecology, Maternity of the Clinic Hospital, Federal University of RS, Porto Alegre, RS, Brazil

<sup>5</sup> Department of Obstetrics and Gynecology, Jundiaí Medical School, Jundiaí, SP, Brazil

<sup>6</sup> Department of Social Medicine, Ribeirão Preto Medical School, University of Sao Paulo, Ribeirão Preto, SP, Brazil

\*Membership of the MAES-I study group is provided in the Acknowledgments.

**E-mail addresses:** RT Souza: [renatotsouzasp@gmail.com](mailto:renatotsouzasp@gmail.com); JG Cecatti: [cecatti@unicamp.br](mailto:cecatti@unicamp.br); J Mayrink: [jussaramayrink@gmail.com](mailto:jussaramayrink@gmail.com); RB Galvão: [rafaelbfg@gmail.com](mailto:rafaelbfg@gmail.com); ML Costa: [mlaura@unicamp.br](mailto:mlaura@unicamp.br); FE Feitosa: [edson.lucena@hotmail.com](mailto:edson.lucena@hotmail.com); EA Rocha Filho: [edilbertorochoa@globo.com](mailto:edilbertorochoa@globo.com); DF Leite: [debora.leite@ufpe.br](mailto:debora.leite@ufpe.br); J Vettorazzi: [janetev@terra.com.br](mailto:janetev@terra.com.br); RP Tedesco: [rp.tedesco@yahoo.com.br](mailto:rp.tedesco@yahoo.com.br); DS Santana: [dany.fmj@terra.com.br](mailto:dany.fmj@terra.com.br); JP Souza: [jp.souza@usp.br](mailto:jp.souza@usp.br)

### #Corresponding Author

JG Cecatti

DO&G, University of Campinas

R. Alexander Fleming, 101

Campinas, SP, 13083-881

Brazil

E-mail: [cecatti@unicamp.br](mailto:cecatti@unicamp.br)

1  
2  
3  
4  
5  
6  
7  
8  
9  
10  
11  
12  
13  
14  
15  
16  
17  
18  
19  
20  
21  
22  
23  
24  
25  
26  
27  
28  
29  
30  
31  
32  
33  
34  
35  
36  
37  
38  
39  
40  
41  
42  
43  
44  
45  
46  
47  
48  
49  
50  
51  
52  
53  
54  
55  
56  
57  
58  
59  
60

## 1 **Abstract**

2 **Introduction:** Non-invasive tools capable of identifying predictors of maternal  
3 complications would be a step forward in the improvement of maternal and perinatal  
4 health. There is association between modification of physical activity (PA) and sleep-  
5 wake patterns and the occurrence of inflammatory, metabolic, pathologic conditions as  
6 chronic diseases. The actigraph device is validated to estimate PA and sleep-wake  
7 patterns among pregnant women. In order to extend the window of opportunity to  
8 prevent, diagnose and treat specific maternal conditions, would it be possible to use  
9 actigraphic data to identify risk factors for the development of adverse maternal  
10 outcomes during pregnancy?

11 **Methods and analysis:** A cohort will be held in 5 centres from the Brazilian Network for  
12 Studies on Reproductive and Perinatal Health. MAES-I will enroll 400 low-risk nulliparous  
13 women that will wear the actigraph device on the wrist during day and night (24h/day)  
14 uninterruptedly from 19-21 weeks until childbirth. Changes in PA and sleep-wake  
15 patterns through pregnancy will be analyzed, considering gestational age ranges, in  
16 women with and without maternal complications during pregnancy, such as  
17 preeclampsia, preterm birth (spontaneous or provider-initiated), gestational diabetes,  
18 maternal haemorrhage and also perinatal outcomes. A predictive model for screening  
19 pregnant women at risk of presenting specific adverse maternal and perinatal outcomes  
20 is planned to be developed using the actigraphy data.

21 **Ethics and Dissemination:** MAES-I study has been reviewed and approved by each  
22 Institutional Review Board (IRB) and also by the National Council for Ethics in Research.  
23 Detailed information of the study is provided in the Brazilian Cohort website  
24 ([www.medscinet.com/samba](http://www.medscinet.com/samba)) and findings will be publicized in scientific literature and  
25 Institutional webpages.

26 **Keywords:** wearable technologies; actigraph; physical activity; sleep patterns; sleep-  
27 wake cycle; prediction; pregnancy complications.

28  
29  
30

1  
2  
3  
4  
5  
6  
7  
8  
9  
10  
11  
12  
13  
14  
15  
16  
17  
18  
19  
20  
21  
22  
23  
24  
25  
26  
27  
28  
29  
30  
31  
32  
33  
34  
35  
36  
37  
38  
39  
40  
41  
42  
43  
44  
45  
46  
47  
48  
49  
50  
51  
52  
53  
54  
55  
56  
57  
58  
59  
60

## 1 **Strengths and limitations of this study**

- 2 • This multicentre cohort will collect comprehensive data on the main maternal  
3 and perinatal complications as pre-eclampsia, small for gestational age/fetal  
4 growth restriction, preterm birth and gestational diabetes mellitus.
- 5 • Physical activity and sleep patterns will be estimated through an innovative  
6 wearable device used in the natural environment of the study subject.
- 7 • Physical activity and sleep patterns will be estimated from the beginning of the  
8 second half of pregnancy until delivery, covering a wide interval during  
9 pregnancy and enabling the study of PA and sleep patterns changes throughout  
10 pregnancy.
- 11 • One possible limitation refers to the uncovered first half of pregnancy regarding  
12 this information.

## 1 **Background**

2 Reducing the global maternal mortality ratio to less than 70 per 100,000 live births by  
3 2030 is one of the targets of the new United Nations Sustainable Development Goals  
4 [1]. Multiple challenges need to be tackled to achieve this target, but the 2016-2030  
5 health and development agenda goes well beyond mortality reduction. The Global  
6 Strategy for Women's, Children's and Adolescent's Health aims to ensure that every  
7 newborn, women and child not only survive but thrive. This will only be possible if a  
8 transformative agenda, with innovation at the central stage, is put into action [2].

9 One of the major challenges that need to be addressed is optimizing the recognition of  
10 earlier predictors and identifiers of maternal and perinatal complications. Delays in  
11 diagnosing and managing maternal complications have been associated with poor  
12 outcomes [3]. The reduced self-perception of clinical signs related to maternal  
13 complications, difficulties in accessing the health system and poor quality of care may  
14 contribute to the late identification of complications and worsened prognosis. The  
15 development of a non-invasive Antenatal Care (ANC) tool capable of identifying  
16 maternal sub-clinical signs during pregnancy may provide the window of opportunity for  
17 the earlier identification of abnormal patterns of physiologic parameters related to  
18 pregnancy complications. We consider earlier identification when the recognition could  
19 be made before clinical presentation, when standard criteria based on clinical signs,  
20 symptoms, and supplementary tests are presented. Shortening the time between the  
21 onset of a complication and the initiation of the appropriate management allow for  
22 secondary prevention and reduction of maternal morbidity and mortality [3–7].

23 Pervasive computing (i.e. the trend towards embedding microprocessors in everyday-  
24 life objects so they can generate data) and wearable technology (i.e. clothing and  
25 accessories incorporating computer and advanced electronic technologies such as wrist  
26 and/or waistband sensors) are ubiquitous and able to generate a new dataset that needs  
27 to be correlated with pregnancy outcomes. Preterm birth and preeclampsia, for  
28 instance, are two important pregnancy complications that have a relatively long  
29 subclinical phase before the appearance of signs or symptoms [8, 9]. It is plausible that  
30 during this subclinical phase of certain conditions the pattern of physical activity (PA) or  
31 sleep-wake rhythm is affected in some way and this change could be captured through

1  
2  
3 1 wearable devices. Although some studies show that PA patterns (actigraphy  
4 parameters) may be related to systemic inflammation and diseases in the general  
5 population [10, 11], published literature correlating wearable technology data and  
6 maternal complications are very scarce.  
7  
8  
9

10  
11 5 The human circadian rhythm is ruled by endogenous physiologic mechanisms and  
12 environmental stimuli [12]. There is solid evidence showing that modification of  
13 circadian rhythm or sleep and PA patterns are an underlying condition related to  
14 inflammatory, degenerative and/or metabolic chronic diseases as diabetes,  
15 hypertension, and cancer [13]. Circadian misalignment is defined as having  
16 inappropriate timed sleep and wake, misplaced feeding periods and modification of  
17 activity behavior.  
18  
19  
20  
21  
22  
23

24 12 The determination of cause or consequence effect between these modifications and the  
25 development of pathological conditions is a complex task. It seems that changes in  
26 appetite-stimulating hormones, glucose metabolism, inflammatory markers, and mood  
27 are some of the related pathways [13–15]. Leproult *et al.* evaluated the effect of  
28 circadian misalignment on metabolic and inflammation markers in cardiovascular  
29 disease [15]. The insulin action and release, and also the levels of some inflammatory  
30 markers that are predictors for cardiovascular diseases, were abnormal in individuals  
31 with circadian misalignment. The mechanisms involved in the association between  
32 changes of PA pattern and pathologic conditions seem to be of multiple etiologies. Sani  
33 *et al.* assessed the circadian rhythm of more than 2,300 African descendant adults. More  
34 than evaluating physical activity itself, the authors aimed to identify chronobiologic  
35 patterns of adults from different socioeconomic settings. The study identified that  
36 chronobiologic behavior can vary depending on individual BMI, socioeconomic  
37 background, work type and time of sunlight exposure. Possibly, many other factors are  
38 involved in modifications of chronobiologic behavior, such as pathologic conditions.  
39 Some metabolic, cognitive, cardiovascular and other chronic degenerative diseases have  
40 been associated with particular patterns of PA and sleep [10, 11, 16–18]. A previous  
41 observational study assessed various sleep parameters during pregnancy, e.g. sleep  
42 onset latency (SOL), wake after sleep onset (WASO) and total nocturnal sleep time (TST).  
43 Difficulty in initiating sleep in early pregnancy was associated with higher body mass  
44  
45  
46  
47  
48  
49  
50  
51  
52  
53  
54  
55  
56  
57  
58  
59  
60

1 index, greater weight gain and higher blood pressure during pregnancy [17]. Palagini *et*  
2 *al.* reviewed clinical evidence between chronic sleep loss and pregnancy adverse  
3 outcomes, discussing common mechanisms of stress system activation [19]. Low-quality  
4 evidence suggests an association between sleep loss and prenatal depression,  
5 gestational diabetes, preeclampsia, abnormal length of labour, caesarean delivery,  
6 abnormal fetal growth, and preterm birth. Those results corroborate with other findings  
7 regarding pregnancy and sleep disorders [20–23].

8 The assessment of PA and the sleep patterns can be performed using small wrist (or  
9 waist) devices similar to a regular watch (actigraphy technology). The type of sensor,  
10 batteries, materials and output data have been substantially developed in recent years,  
11 enabling low cost, comfort, discretion and performance [24]. Nowadays there are  
12 devices that are portable, lightweight and with a large capacity to storage information,  
13 including a software with automatic scoring algorithms packages for the detection of  
14 wakefulness, sleep periods and PA [24, 25]. The actigraphy estimation of PA and sleep  
15 patterns is validated as a proxy for chronobiologic behavior [26–29] and 7 to 14 days  
16 using the actigraph device provides reliable estimates of PA behavior in older adults [30–  
17 32]. Both hip and wrist devices show reliable and acceptable performance in estimating  
18 PA and sleep-wake patterns [33–36].

19 The main advantages of using wearable devices for actigraphy is the non-invasiveness,  
20 24/7 monitoring of the circadian pattern and PA, and informing sleep habits and  
21 parameters in the user natural environment [24, 25, 28]. We propose an innovative and  
22 strategic approach to monitor PA and sleep-wake patterns during pregnancy,  
23 establishing a large database comprised of clinical, epidemiological, PA and sleep-wake  
24 variables potentially capable of composing a prediction model for maternal  
25 complications during pregnancy. The main goal of this study is to identify earlier  
26 predictors of pregnancy complications by correlating data generated on PA and sleep  
27 patterns through wearable devices (wristband sensors) with maternal and perinatal  
28 complications and outcomes.

## 29 **Methods/Design**

### 30 ***Study design***

1 We will conduct a cohort study of 400 pregnant women using wrist sensor bands able  
2 to capture information on daily physical activity and sleep patterns (exposure). This  
3 cohort study will be implemented in 5 ANC clinics linked to obstetric units in 3 different  
4 regions of Brazil that are already part of the Brazilian Network for Studies on  
5 Reproductive and Perinatal Health [37], as shown in Table 1. During a period of eight  
6 months, the ANC clinics will identify eligible cases for using the wristband sensors.  
7 Wearable technology data will be correlated with the occurrence of pregnancy and  
8 childbirth complications and outcomes, such as hypertensive disorders, gestational  
9 diabetes mellitus, fetal growth restriction and prematurity.

10 Eligible women will be identified up to 21 weeks of gestation and invited to participate.  
11 A proper consent form will be applied and the women who agree to participate will  
12 receive a wristband sensor to be used starting at 19-21 weeks until childbirth,  
13 uninterruptedly.

#### 14 ***Study setting and population***

15 Brazil is a multi-ethnic mixed-race population of diverse resourced settings [38]. Despite  
16 the considered high global overall human development index (HDI 0.727) in 2010, the  
17 HDI of Brazilian municipalities ranged from 0,862 to 0,418 [39]. The possibility of  
18 considering such mixed population is suitable to explore information regarding maternal  
19 patterns of mobility and sleep, maximizing external validity and comparisons to other  
20 populations. The following reasons support the study population being focused in low-  
21 risk nulliparous women: 1) Previous obstetric history can refer to known risk factors for  
22 many maternal complications such as preterm birth, preeclampsia, and diabetes [13,  
23 40]. Therefore nulliparous women enable unbiased sampling regarding obstetric history.  
24 2) Women with previous morbidity such as hypertension, diabetes, nephropathy or  
25 others chronic/degenerative diseases are more likely to present abnormalities of sleep-  
26 wake rhythm or physical activity patterns during pregnancy.

#### 27 ***Sampling***

28 The five participating centers are regional referral obstetric units responsible for  
29 antenatal care assistance mainly for high-risk pregnant women. Participating centers are  
30 listed in Table 1. Nevertheless, there are primary health care units strategically linked

1 with these participating centers, enabling the identification and enrollment of women  
2 with non-pathological pregnancies. The recruitment strategies include approaching all  
3 eligible women in these participating centers and their linked facilities. An informed  
4 consent form will be applied for women who agree to participate.

#### 5 *Eligible women: Low-risk pregnant subjects*

6 There is no international consensus on the criteria for low-risk pregnancies, although  
7 there are several known factors associated with maternal and perinatal adverse  
8 outcomes. A recent study evaluating complications of “low-risk” pregnancies of US  
9 Americans (10 million births from 2011 through 2013) showed that 29% of low-risk  
10 women had an unexpected complication requiring no routine obstetric/neonatal care  
11 [41]. This shows the difficulty in establishing a “low-risk profile” for maternal/perinatal  
12 complications. In order to better identify eligible low-risk pregnant women, we excluded  
13 potential known confounders of pre-pregnancy conditions that could be related to  
14 adverse maternal or perinatal outcomes as shown in Table 2, so we could assess PA and  
15 sleep patterns of a mostly “normal” population. Nonetheless, lifestyle habits and body  
16 composition (Body mass index, height, etc.) characteristics, and some non-severe  
17 chronic diseases as non-severe anaemia and/or asthma are not among the exclusion  
18 criteria in this study but may be part of subgroup analyses (composition of any previous  
19 disorder, e.g.). Intra and inter-individual analyses of PA and sleep patterns enable the  
20 identification of potential confounders affecting primary outcomes, avoiding potential  
21 biases. It means that comparison of PA and sleep pattern parameters collected in  
22 different stages of pregnancy from the same participant (intra-individual analysis) and  
23 collected at the same stage of pregnancy from different participants (inter-individual  
24 analysis) will be carried out.

25 Eligible women will be enrolled between 04-21 weeks. The inclusion and exclusion  
26 criteria are presented in Table 2.

#### 27 **Data collection methods**

28 Essentially, MAES I study is comprised of 4 key set points – 3 clinical visits during  
29 pregnancy and a postnatal visit. The clinical visits will be held at 1) between 19-21 weeks;  
30 2) between 27-29 weeks; 3) between 37-39 weeks. At first, second, third and postnatal



1  
2  
3 1 visits, additional information regarding maternal history, details on pregnancy  
4 2 complications, maternal biophysical data (weight, height, skinfolds) and pregnancy  
5 3 adverse outcomes will be collected following a specific Standard Operating Procedure  
6 4 (SOP) specially developed for MAES-I study. Additionally, the Perceived Stress Scale [42]  
7 5 and Resilience Scale [43] will be applied during 27-29w visit. Figure 1 shows the set  
8 6 points of MAES-I study.

9 7 Eligible women will be invited to use a 43mmx40mmx13mm water-resistant wrist device  
10 8 similar to a regular watch (GENEActiv Original – Activinsights®). The device contains  
11 9 accelerometer to estimate PA and sensors to estimate sleep-wake patterns through light  
12 10 and temperature measurements, using a proper software algorithm.

13 11 At the first set point of MAES-I study (between 19+0 - 21+0 weeks of gestation), eligible  
14 12 women who agreed to participate will be instructed that the wrist bracelet device should  
15 13 be worn on the non-dominant arm during day and night (24h/day) uninterruptedly until  
16 14 childbirth (including bathing or aquatic activities). The participant will not have to press  
17 15 any button or take any special care regarding the functioning of the device, which will  
18 16 be configured to register physical activity and sleep-wake data automatically from the  
19 17 moment it is delivered at the antenatal care visit. Also the battery charge will be held by  
20 18 the research assistant before delivering the device to the participant woman.

21 19 The acquisition of actigraphy data can be performed in different frequencies (from 10Hz  
22 20 to 100Hz). Since the frequency of data acquisition impacts on the battery life of the  
23 21 device (inverse relationship), the measurement frequency will be set up according to  
24 22 the participant's gestational age (Table 3). This information will be registered in the  
25 23 database accordingly. The data accumulated will be downloaded during participant's  
26 24 antenatal care visits, according to the maximum return periods showed in Table 3. The  
27 25 maximum return periods were calculated taking into consideration the expected battery  
28 26 life. At each antenatal care visit, the used device will be returned to the research team  
29 27 and a new charged device will be provided to the participant.

30 28 A leaflet with detailed information and FAQ (Frequently asked questions) on the device  
31 29 will also be provided to the women. They will also have a cell phone number to call  
32 30 whether doubts arise regarding the procedures for using the device, or if any technical  
33 31 or medical concern arises.

1  
2  
3 1 During each antenatal care visit, the wrist device will be connected to a charge base  
4  
5 2 which can be connected to a computer through an USB connection. All actigraphy data  
6  
7 3 will be extracted to the computer as a raw data “.bin” file. An open source proper  
8  
9 4 software (Geneactiv Software®) will allow to convert this file into “.csv” compressed  
10  
11 5 epoch files for each 30 minutes of registered data, which can be read in Excel® program.  
12  
13 6 Then, the actigraphy data will be uploaded to an online database platform developed by  
14  
15 7 MedSciNet®, where all clinical data of the study will also be registered.

16  
17 8 The actigraphy software uses several algorithms to translate numerical information  
18  
19 9 obtained through the epoch files into physical activity and sleep-wake patterns, which  
20  
21 10 will compose the independent variables of this study. The database is centralized,  
22  
23 11 secure, internet-based and allows several procedures for prospective and retrospective  
24  
25 12 monitoring, hierarchical access (local user, general manager, etc.). The database will be  
26  
27 13 translated into Portuguese and English, facilitating data collection for Portuguese-  
28  
29 14 speaking team and international monitoring. A correspondent paper form will be  
30  
31 15 available for data collection if necessary (e.g. internet connection failure for instance).

#### 32 *Decision to start monitoring PA and sleep patterns between 19-21weeks*

33  
34 17 There are various underlying mechanisms involved in the development of the maternal  
35  
36 18 and perinatal adverse outcomes that will be assessed, as preterm birth, preeclampsia,  
37  
38 19 gestational diabetes, fetal growth restriction and small for gestational age. The pre-  
39  
40 20 clinical phase, stage where there are no clinical signs or symptoms, might be different  
41  
42 21 for each disease and dependent on environmental and individual aspects. The study of  
43  
44 22 adverse maternal and perinatal predictors has been focused in early pregnancy so far  
45  
46 23 (first trimester, <14 weeks of gestation), aiming to maximize the window of opportunity  
47  
48 24 for preventative interventions. However, we hypothesized that the modification of PA  
49  
50 25 and/or sleep pattern due to maternal underlying changes of biological function might  
51  
52 26 not be evident at a very early stage in pregnancy before the beginning of the pre-clinical  
53  
54 27 phase. Our hypothesis is that it possibly occurs shortly before symptoms.

55  
56 28 Additionally, we took into account that the occurrence of the main maternal  
57  
58 29 complications, as preeclampsia, fetal growth restriction, and preterm birth, are more  
59  
60 30 common in late pregnancy to establish the period between 19-21 weeks as appropriate  
31 to start the assessment of PA and sleep patterns. A recent cross-sectional study

1  
2  
3 1 conducted in 20 referral centres in Brazil, including the five participating centres of this  
4  
5 2 proposal, showed that the occurrence of preterm birth before 28 weeks comprised less  
6  
7 3 than 1% of all births and less than 8% of all preterm births [44]. In addition, the early  
8  
9 4 onset of preeclampsia (before 34 weeks of gestation) complicates less than 0.4% of all  
10  
11 5 pregnancies, according to a large retrospective cohort of more than 450,000 deliveries  
12  
13 6 in USA [45]. Figure 2 outlines the predicted prevalence of preterm birth and  
14  
15 7 preeclampsia in the second trimester, highlighting its clinical presentation, when classic  
16  
17 8 symptoms and signs of a certain disease/complication are presented, through  
18  
19 9 pregnancy in red. Our hypothesis is that PA and sleep patterns might be altered closely  
20  
21 10 to the clinical presentation, still in preclinical phase when there is no symptoms or signs.

22  
23 11 In brief, as an exploratory study, we indeed needed to make an arbitrary decision  
24  
25 12 regarding interval of monitoring PA and sleep patterns. For that, we had taken into  
26  
27 13 consideration: 1) the main maternal/perinatal complications of interest occur in the  
28  
29 14 second half of pregnancy, more precisely in late pregnancy (Figure 2); 2) we hypothesize  
30  
31 15 that any potential change on PA or sleep patterns might occur days or weeks before the  
32  
33 16 onset of maternal or perinatal complication. Then, we focused monitoring women  
34  
35 17 during second half of pregnancy.

36  
37 18 Thus, the start of assessment between 19-21 weeks seems to be very reasonable,  
38  
39 19 providing a wide interval to monitor and predict the main maternal and perinatal  
40  
41 20 adverse outcomes.

#### 41 *Actigraph device*

42  
43 22 The actigraph device that will be used to monitor PA and sleep-wake patterns is  
44  
45 23 GENEActiv Original (GENEActiv, Activinsights Ltd, Huntingdon, UK). The device has  
46  
47 24 multiple sensors as microelectromechanical (MEMS) accelerometer, temperature  
48  
49 25 (linear active thermistor) and light (silicon photodiode), providing crude raw data for a  
50  
51 26 variety of applications.

#### 52 53 27 *Wrist vs waist wear: advantages and performance*

54  
55 28 Wrist wear of actigraph devices provides more comfortable use during wake and sleep  
56  
57 29 periods and highest wear time compared to waist monitors [33, 46]. A non-systematic  
58  
59 30 review published in 2011 showed that actigraphy is a useful and reliable tool to assess  
60

1  
2  
3 1 sleep patterns and circadian rhythm disorders, although there are some limitations on  
4  
5 2 diagnosing sleep diseases or measuring sleep stages [25]. Actigraphy showed excellent  
6  
7 3 concordance with polysomnography in assessing sleep parameters in healthy subjects  
8  
9 4 (sensitivity >90% in estimating total sleep time, for instance). A recent study evaluated  
10  
11 5 the concordance of physical activity estimation of wrist device in free-living settings in  
12  
13 6 forty overweight or obese women [34]. They used both wrist and hip devices, and a  
14  
15 7 small camera that captured participant behaviour for 7 days, enabling the monitoring of  
16  
17 8 physical activity behaviour (gold-standard comparison). The hip and wrist machine  
18  
19 9 learning (ML) classifiers used are different due to the different methods/algorithms to  
20  
21 10 estimate physical activity [34]. The sensitivity and specificity of hip and wrist estimations  
22  
23 11 according to Ellis *et al* are showed in Table 4 [34].

24  
25 12 Two years ago, the same author had published a similar evaluation using 40 adults  
26  
27 13 (women and men), showing that the hip and wrist accelerometers obtained an average  
28  
29 14 accuracy of 92.3% and 87.5%, respectively, in predicting PA types [47].

30  
31 15 Staudenmayer *et al* developed an investigation with 20 participants also using two  
32  
33 16 devices (wrist- and hip- worn), and showed that wrist actigraphy can estimate energy  
34  
35 17 expenditure accurately and relatively precisely [48]. Another study evaluating PA  
36  
37 18 patterns in a free-living environment with wrist devices showed that women in the top  
38  
39 19 40% or bottom 40% of the distribution of daily PA, hip and wrist accelerometers agreed  
40  
41 20 on the classification for about 75% of the women [49]. Additionally, the total activity  
42  
43 21 (counts per day) was moderately correlated (Spearman's  $r = 0.73$ ) between the wrist  
44  
45 22 and hip worn devices.

46  
47 23 At the best of our knowledge, there are no systematic reviews or other high-quality  
48  
49 24 evidence-based recommendation supporting a particular method. Although wrist wear  
50  
51 25 of actigraphy is not the more traditional method, it might be the best choice for  
52  
53 26 assessing long periods of PA or sleep patterns, even more considering the similar  
54  
55 27 performance of the waist wear. The current proposal does not intend to diagnose  
56  
57 28 pathologic behaviours or diseases, but to identify different patterns along pregnancy  
58  
59 29 and in different subgroups of women. Therefore, supported by the evidence that wrist  
60  
30 wear of actigraphy devices can accurately and more comfortably estimate PA and sleep

1  
2  
3 1 patterns, mainly for long periods and in the free-living environment, the MAES-I study  
4  
5 2 group adopted wrist wear devices.

### 6 3 **Main variables**

7  
8  
9  
10 4 The independent variables assessed as potential predictors of maternal complications  
11  
12 5 will be related to sleep-wake cycle and mobility as:

#### 13 6 *“Sleep” variables*

- 14 7 - Sleep onset latency (SOL): time elapsed between full wakefulness to sleep.
- 15 8 - Total sleep time (TST): The amount of actual sleep time in a sleep episode (excludes  
16 9 awakes).
- 17 10 - Wake after sleep onset (WASO): defined as total amount of time awake after sleep.
- 18 11 - Sleep Efficiency (SE): the proportion of sleep in the period potentially filled by sleep-  
19 12 ratio of total sleep time to time in bed.

20  
21  
22  
23  
24  
25  
26  
27  
28 13 The actigraph device collects many pieces of information related to body position and  
29  
30 14 body movements to estimate the described sleep variables. Then, actigraphy software  
31  
32 15 will be used to analyse the data and generate the output variables.

#### 33 16 *“Physical activity” variables*

34  
35  
36 17 Actigraphy technology estimates physical activity through various parameters  
37  
38 18 collected by the actigraph device. Briefly, according to Freedson *et al*, the triaxial  
39  
40 19 sensors stressed by acceleration forces can estimate the intensity of movements. The  
41  
42 20 acceleration signal is converted to digital signal and summed over a user specified time  
43  
44 21 interval (epoch). At the end of each epoch the activity count is stored. Then, according  
45  
46 22 to Count per minute (CPM) cut points, the PA intensity can be categorized [50]. The  
47  
48 23 information is translated by the software using proper algorithms into quantitative  
49  
50 24 variables as following:

- 51 25 - Sedentary time (hours/day): the number of hours per day of count per minute  
52 26 between 0-99.
  - 53 27 - Light activity (hours/day): the number of hours per day having count per minute  
54 28 between 100 - 1951.
- 55  
56  
57  
58  
59  
60

1  
2  
3  
4  
5  
6  
7  
8  
9  
10  
11  
12  
13  
14  
15  
16  
17  
18  
19  
20  
21  
22  
23  
24  
25  
26  
27  
28  
29  
30  
31  
32  
33  
34  
35  
36  
37  
38  
39  
40  
41  
42  
43  
44  
45  
46  
47  
48  
49  
50  
51  
52  
53  
54  
55  
56  
57  
58  
59  
60

- 1 - Moderate activity (minutes/day): the number of hours per day having count per  
2 minute between 1952 - 5724.
- 3 - Vigorous activity (minutes/day): the number of hours per day having count per  
4 minute between 5725 - 9498.
- 5 - Very vigorous activity (minutes/day): the number of hours per day having count  
6 per minute between 9499 -  $\infty$ .
- 7 - MET rates: Metabolic Equivalents (METs) are commonly used to also express the  
8 intensity of physical activities. One MET is the energy cost of resting quietly, often  
9 defined in terms of oxygen uptake as  $3.5 \text{ mL}\cdot\text{kg}^{-1}\cdot\text{min}^{-1}$ . MET rate expresses a  
10 person's working metabolic rate relative to their resting metabolic rate. Briefly,  
11 the triaxial piezoelectric sensors stressed by acceleration forces can estimate the  
12 intensity of movements, converted to the oxygen consumption required to  
13 perform such movement.
- 14 - Step counts/day: estimated steps count per day (estimated by proper algorithms  
15 using accelerometer data.)

### 16 *Outcomes*

17 The primary outcomes are late pregnancy complications as:

- 18 - Preeclampsia: Hypertension after 20 weeks of gestation, systolic BP  $\geq 140\text{mmHg}$   
19 and/or diastolic BP  $\geq 90\text{mmHg}$  (Korotkoff V) on at least 2 occasions 4h apart with:  
20 1) Proteinuria 300 mg/24h or spot urine protein: creatinine ratio 30 mg/mmol  
21 creatinine or urine dipstick protein  $\geq (+)$  OR, in the absence of proteinuria,  
22 hypertension and 2) any multi-system complication that are: Haematological  
23 abnormalities; thrombocytopenia (platelets  $< 100 \times 10^9/\text{L}$ ); Disseminated  
24 intravascular coagulation (DIC), and haemolysis; Liver disease: increased aspartate  
25 transaminase and/or alanine transaminase  $> 45 \text{ IU/L}$  and/or severe right upper  
26 quadrant or epigastric pain, liver rupture; Neurological problems: eclampsia,  
27 imminent eclampsia (severe headache with hyperreflexia and persistent visual  
28 disturbance), cerebral haemorrhage; Acute renal insufficiency: new increase in  
29 serum creatinine to  $> 100 \text{ mmol/L}$  antepartum or  $> 130 \text{ mmol/L}$  postpartum;  
30 Pulmonary oedema confirmed by chest x-ray [51].

- 1  
2  
3 1 - Gestational Diabetes: new diabetes developing in pregnancy according to the WHO  
4 recommendation [52] that defines gestational diabetes as having:  
5 2  
6  
7 3     ○ Fasting plasma glucose  $\geq$  92 mg/dl, or  
8     ○ 1-h plasma glucose tolerance test (75g load)  $\geq$  180 mg/dl, or  
9     ○ 2-h plasma glucose tolerance test (75g load)  $\geq$  153 mg/dl.  
10  
11  
12 6 - Spontaneous Preterm Birth: spontaneous onset of preterm labour or premature  
13 rupture of membranes leading to preterm birth, childbirth before 37 weeks of  
14 gestation.  
15  
16  
17 9 - Provider-Initiated Preterm Birth: defined as childbirth occurring at less than 37  
18 weeks, medically indicated due to maternal/fetal compromise or both;  
19  
20  
21 11 - Maternal Hemorrhage: Classified in 1) Antepartum haemorrhage defined as  
22 bleeding from the genital tract after 24 weeks of gestation; 2) Primary Postpartum  
23 haemorrhage as the loss of 500 ml blood or more from the genital tract within 24  
24 hours of the childbirth.  
25  
26  
27  
28

29 Secondary outcomes include childbirth variables and neonatal adverse outcomes as  
30 fetal death, caesarean section, small for gestational age (defined as birth weight below  
31 percentile 10 for gestational age), Apgar score  $<$  7 at 5 minutes, neonatal severe  
32 morbidity (Table 5) and neonatal mortality before discharge.  
33  
34  
35

### 36 **Plans for analyses**

#### 37 *Sample size estimation*

38  
39  
40  
41  
42 This is an exploratory and innovative study focused on a specific population (pregnant  
43 women) and therefore there are no previously published parameters available for  
44 sample size estimation. Considering a relatively wide range of frequency of  
45 complications arising in pregnancy from 3 to 20% (including preeclampsia, fetal growth  
46 restriction, gestational diabetes, hemorrhage, preterm birth, etc.), a theoretical large  
47 population size (above 1 million pregnant women), an acceptable margin of error of 4%,  
48 the involvement of 5 clusters (participating centers) and a 95% level of confidence, 384  
49 women would be necessary. Therefore, we are rounding up this estimation for at least  
50 400 initially low-risk pregnant women to be enrolled in the study. We estimated the  
51 incidence of some main maternal complications considering the following studies:  
52  
53  
54  
55  
56  
57  
58  
59  
60

1  
2  
3  
4  
5  
6  
7  
8  
9  
10  
11  
12  
13  
14  
15  
16  
17  
18  
19  
20  
21  
22  
23  
24  
25  
26  
27  
28  
29  
30  
31  
32  
33  
34  
35  
36  
37  
38  
39  
40  
41  
42  
43  
44  
45  
46  
47  
48  
49  
50  
51  
52  
53  
54  
55  
56  
57  
58  
59  
60

- 1 - Pre-eclampsia: An international prospective cohort study with nulliparous women called SCOPE used similar criteria for the low-risk profile, having 5% of incidence of pre-eclampsia [53].
- 2 - Preterm Birth: A recent cross-sectional study conducted in 20 referral obstetric centres in Brazil, including the five participant centres of this proposal, showed a prevalence of 12.3% of all births [44].
- 3 - Gestational Diabetes: SCOPE international cohort, previously mentioned, had a prevalence of 8.9% of gestational diabetes in low-risk screened nulliparous women, according to mainly to the NICE guidelines [54].
- 4 - Fetal growth restriction/small for gestational age: SCOPE international cohort, previously mentioned, had a prevalence of 10.7% of newborns small for gestational age, according to the customized centiles of birthweight (<10%)[55].

### 13 *Statistical Analysis details*

14 According to these studies above, the predicted incidence of these complications seems reasonable and reproducible in our cohort. Then, sample size estimation might assure enough cases of maternal and perinatal complications for the current proposal.

17 The epoch files obtained from Geneactv Software by reading data of sleep variables and physical activity parameters will be translated into numerical results and then averaged in periods of 7 days. By doing this, there will be one value to be used in statistical analysis for each variable per week of use of the wrist device.

21 Firstly, we will identify PA and sleep-wake patterns of women who did not develop adverse maternal or perinatal outcomes. It will permit the recognition of a normal PA and sleep-wake patterns in low-risk population without complication during pregnancy. Using the same population, we will analyze changes in PA and sleep-wake patterns through pregnancy, allowing for gestational age periods.

26 Then, we will compare the PA and sleep-wake patterns of women who developed specific adverse maternal or perinatal outcomes with those who did not. The differences between groups might be identified to be used as potential markers for specific pregnancy complications.



1  
2  
3 1 After that, we will analyze changes in PA and sleep-wake patterns of women who  
4 developed adverse maternal or perinatal outcomes through pregnancy, comparing the  
5 patterns and trying to discover which changes and when before the onset it would be  
6 related to pregnancy complications. If possible, we will conduct subgroup analysis  
7 including subpopulation with potential higher risk for maternal complications  
8 (confounder variables), including obesity, smoking, etc.

9 Finally, we will develop a predictive model for screening pregnant women for risk of  
10 specific adverse maternal and perinatal outcomes using PA and sleep-wake data  
11 estimated with actigraphy technology.

12 The analysis will be performed using the actigraph software that translates the collected  
13 information into PA and sleep-wake parameters. Additionally, data regarding time of  
14 sleep onset latency, wake after sleep onset and total sleep time as well as sleep  
15 efficiency will be compared between participants along the whole pregnancy time using  
16 Friedman and Wilcoxon for paired samples. ANOVA and t-test will be used to compare  
17 the sleep parameters between the participants for each week of gestational age for  
18 repeated measures. The same tests will be applied to analyze quantitative data  
19 regarding the median of number of hours per day having different types of physical  
20 activity (sedentary, light, moderate, vigorous and very vigorous), MET rates and  
21 estimative os steps/day through the entire gestational period examined, and the  
22 comparison between the participants for each week of gestational age. Also, we will  
23 address sensitivity, specificity and likelihood ratio for altered PA and sleep patterns or  
24 for their changes throughout pregnancy.

### 25 ***Discontinuation of participants***

26 The criteria for discontinuation include:

- 27 - Withdrawal of consent;
- 28 - Not regularly using the actigraph device for long periods, less than 50% of all planned  
29 time. The information that they are not using the device properly will be recorded if  
30 women notice the MAES-I team. Otherwise, the low use of the device will be noticed  
31 after data discharge during antenatal care visits.
- 32 - The loss to follow-up, not allowing the download of actigraphy data.

1  
2  
3 1 Those women who decide to leave follow-up will be asked by telephone call to return  
4  
5 2 the wrist device and a last visit will be set in order to regain the wrist monitor and direct  
6  
7 3 the woman to a proper antenatal care service to continue their consultations.  
8

#### 9 4 **Data and Sample Quality**

10  
11 5 All entered data will be prospectively and retrospectively monitored by local research  
12  
13 6 assistants and a global monitor. Internal consistency of variables will be constantly  
14  
15 7 performed by the database and error messages are automatically flagged. A local  
16  
17 8 research assistant will be responsible for checking all forms and actigraphy data before  
18  
19 9 locking forms, assuring good quality of data (double-checking entered data and checking  
20  
21 10 for inconsistencies between variables, for instance). Then, the local principal  
22  
23 11 investigator (PI) will be responsible for signing the case, enabling its incorporation to the  
24  
25 12 final database. The University of Campinas will coordinate, implement and monitor the  
26  
27 13 study in the five participating centres. A general manager and a global monitor are also  
28  
29 14 part of the team of the coordinating centre. The local team of each participating centre  
30  
31 15 is comprised of a Local PI and research assistants.

#### 32 16 **Ethics and Dissemination**

33  
34 17 MAES-I study focuses on low-risk nulliparous Brazilian pregnant women. Despite being  
35  
36 18 considered of low risk for maternal and perinatal complications, they are not free of  
37  
38 19 suffering complications. Furthermore, the first and second delays, defined as a delay in  
39  
40 20 deciding to seek care and delay in reaching a health care facility [56], are not uncommon,  
41  
42 21 establishing a barrier between earlier recognition of symptoms and timely interventions  
43  
44 22 capable to successfully treat potentially life-threatening conditions. We believe that  
45  
46 23 women will feel encouraged, empowered and willing to participate in the study that  
47  
48 24 aims to develop a potentially useful prenatal care tool to identify the risk for maternal  
49  
50 25 and perinatal morbidity and mortality. Following national ethical regulations, the  
51  
52 26 participants will not receive any financial compensation.

53  
54 27 Women who agree to participate in the study will not have any disadvantages or  
55  
56 28 compromise of their prenatal care. On the contrary, they will receive a telephone  
57  
58 29 number to contact the clinical researchers at any time (24/7 service), which enables a  
59  
60 30 closer contact with researchers and providers of care, since the MAES-I team are

1 committed to contacting providers of care if any potential complication is noticed by  
2 participants.

3 The participating women will not be responsible if loss, theft or damage to the wrist  
4 device occurs. They will be asked only to use the device just as a regular wrist-watch  
5 would be worn and no self-damage is expected in those who use it.

6 Participating women will not be able to identify any PA or sleep parameters at any stage  
7 of the study. The download of the data is only possible through the own licensed  
8 software of the device. Actigraphy devices provided for participating women have a  
9 unique code which will be recorded in the database together with the interval of use for  
10 each women. Actigraphy data will be labelled using participant ID, device number,  
11 gestational age when starting using each device and return date of each device. The use  
12 of such codes, ID`s and numbers will ensure confidential identify for all participating  
13 women. The identity of all women will be kept confidential.

14 MAES-I study has been reviewed and approved by the National Committee for Ethics in  
15 Research of Brazil (CONEP) and by the Institutional Review Board (IRB) of the  
16 coordinating centre (Letter of approval 1.834.116 issued on 24<sup>th</sup> November 2016) and  
17 of all other Brazilian participating centres. All women who will be enrolled in the MAES-I  
18 cohort will sign an informed consent form.

19 The ethical principles stated in the Brazilian National Health Council (Resolution CNS  
20 466/12) will be respected in every stage of this study. The anonymity of the source of  
21 information will be guaranteed and the care for the women will be provided  
22 independently of her agreement to participate in the study. The study also complies with  
23 the Declaration of Helsinki amended in Hong Kong in 1989. The methodological and  
24 ethical aspects of MAES-I study protocol were developed following STROBE guidelines  
25 [57].

#### 26 *Patient and Public Involvement*

27 Patients and public were not involved in this study for the development of the research  
28 question and outcome measures. However, the choice for a wrist device was based on  
29 the preference of users as reported. Participants of the study will have access to the  
30 results by its webpage that will be open access.

1  
2  
3 1 Detailed information of the study is provided in the Brazilian Cohort website  
4 ([www.medscinet.com/samba](http://www.medscinet.com/samba)) and findings will be publicized in scientific literature and  
5  
6  
7 3 Institutional webpages. We intend to disseminate our findings in scientific peer-  
8  
9 4 reviewed journal, general free access website, specialists' conferences, and to our  
10  
11 5 funding agencies.  
12  
13 6

## 15 7 **Discussion**

17 8 The actigraphy is an innovative, non-invasive, non-operator dependent, wearable  
18  
19 9 technology, which enables the estimative under real life conditions of diverse variables  
20  
21 10 related to mobility, physical activity, sleep-wake, and circadian cycle patterns. Actigraph  
22  
23 11 devices show high sensitivity in sleep-wake parameters detection and are currently  
24  
25 12 highly recommended by the American Sleep Disorder Association for diagnosis and  
26  
27 13 therapy response of circadian rhythm disorders [27, 28, 58]. Although some studies  
28  
29 14 show that 7 to 14 days using the actigraph device provides reliable estimates of physical  
30  
31 15 activity behavior in older adult, it is not absolutely clear how many days is needed to  
32  
33 16 estimate habitual PA by using the wrist/waist device during pregnancy. In general, it  
34  
35 17 seems to depend mainly on the type of actigraph device, position of wear and target  
36  
37 18 population [30, 33]. Nevertheless, MAES-I study will provide sufficient data to assess  
38  
39 19 different patterns along pregnancy.

40 20 The use of wearable physical activity monitors has grown enormously due to the interest  
41  
42 21 about the relationship between the pathophysiology of diseases and physical activity  
43  
44 22 and sleep patterns. A recent study on the use of physical activity monitors in human  
45  
46 23 physiology research unravels the current and potential uses of actigraph device as in  
47  
48 24 strategies to promote healthier behaviour or to predict outcomes [59]. The authors  
49  
50 25 conclude that physical activity monitors, as others new 21<sup>st</sup> century technologies, have  
51  
52 26 already transformed physiology research, revolutionizing the way we assess patients and  
53  
54 27 opening new areas of interest. In addition, the use of objectives measures to evaluate  
55  
56 28 habitual sleep duration and outcomes in pregnancy is critical, taking into account recent  
57  
58 29 investigations reporting little agreement between objective and subjective assessments  
59  
60 30 of sleep time [60].

1 Alterations in sleep patterns, as less deep sleep and more nocturnal awakenings, can be  
2 observed in pregnancy as early as 10-12 weeks gestation [61]. Sleep disturbances during  
3 pregnancy have been associated with preterm delivery, gestational hypertensive  
4 disorders, glucose intolerance and increased risk of caesarean delivery [19]. Shorter  
5 night time sleep was also associated with hyperglycemia [62]. Persistent sleep deficiency  
6 is correlated with depressive symptoms and stress perception by pregnant women [61].  
7 These studies lay correlation between PA patterns and sleep disturbances determining  
8 complications, in a well-established relationship of cause and consequence, although  
9 sometimes it could not be adequately determined due to the study design [17].

10 In a distinct way, our analysis intends to figure out if the maternal complication could be  
11 identified by physical activity and/or sleep patterns modifications, even during its pre-  
12 clinical period, previous the appearance of clinical signs. Considering the existing  
13 evidence, we speculate that the PA and/or sleep patterns change days or weeks before  
14 the clinical presentation of the complication. In general, the signs and symptoms of some  
15 maternal outcomes are part of the gold-standard criteria for diagnosis (high blood  
16 pressure, proteinuria and/or edema in the case of preeclampsia; premature contractions  
17 and cervical ripening/dilation in preterm birth; abnormal placental blood flow and  
18 insufficient fetal growth in Intrauterine Growth Restriction). We acknowledge the fact  
19 that there are potential confounders and limitations in predicting maternal and perinatal  
20 complications using PA and sleep patterns estimated by actigraph devices. We expect  
21 that our studied population will have different subgroups of women with different risks  
22 and associated factors playing a role on maternal complication. It includes obesity,  
23 smoking, extremes of age, for instance. None of those factors was considered exclusion  
24 criteria and, if possible, we intend to assess subgroup analysis for those maternal  
25 subgroups at they might present different PA and sleep patterns. Nonetheless, we  
26 decided to perform a pragmatic approach, not excluding such common factor from our  
27 sample.

28 The use of actigraph device during prenatal visits has a potential to become a new tool  
29 to monitor pregnant women, improving maternal health care, identifying altered PA  
30 and/or sleep patterns, measured objectively through actigraphy, before the occurrence  
31 of those signs and symptoms. Therefore, the focus would be offering new technology to

1  
2  
3  
4  
5  
6  
7  
8  
9  
10  
11  
12  
13  
14  
15  
16  
17  
18  
19  
20  
21  
22  
23  
24  
25  
26  
27  
28  
29  
30  
31  
32  
33  
34  
35  
36  
37  
38  
39  
40  
41  
42  
43  
44  
45  
46  
47  
48  
49  
50  
51  
52  
53  
54  
55  
56  
57  
58  
59  
60

1 monitor the development of a potential maternal complication. Other positive points of  
2 our study are the period of data collection (from 19 weeks till delivery) and the low-risk  
3 profile of the cohort. Through which, it would be possible to describe a PA and sleep  
4 patterns in a low-risk pregnant population and better interpret actigraphy data among  
5 pregnant women. The current clinical and biological predictors for the main maternal  
6 complications as preeclampsia, preterm birth, maternal haemorrhage, and gestational  
7 diabetes still lack for effective sensitivity and specificity.

8 If this is confirmed to be true, an important step will be achieved for a possible  
9 introduction of screening non-invasive procedures during prenatal care with the  
10 purpose of identifying women at higher risk of developing those conditions. Therefore,  
11 they could receive specific orientation on prevention and earlier detection of the onset  
12 of condition for taking immediate action to look for professional health care and  
13 receiving appropriate interventions, avoiding delays that are the most striking factor for  
14 the low quality of care the women usually receive in low and middle-income settings,  
15 contributing to the still high burden of maternal morbidity and mortality. If we were  
16 successful in identifying such “specific patterns of physical activity and sleep” as  
17 predictors for pregnancy complications, further validation studies will necessarily be  
18 recommended for assessing its effectiveness for the whole management of such  
19 conditions. Additionally, MAES-I will enable further specific studies among high risk  
20 population and also will help to identify the best gestational age for monitoring, giving  
21 the means to target a specific gestational age interval.

22  
23  
24  
25

## 1 Abbreviations

|                                                     |                                                             |
|-----------------------------------------------------|-------------------------------------------------------------|
| ANC – antenatal care                                | min – minutes                                               |
| BMI – body mass index                               | mg – milligram                                              |
| BP – blood pressure                                 | mL – millilitre                                             |
| CPM – count per minute                              | mmol – millimole                                            |
| dL – decilitre                                      | NICE – National Institute for Health and<br>Care Excellence |
| FAQ – frequently asked questions                    | PA – physical activity                                      |
| h – hour                                            | PI – Principal investigator                                 |
| HDI – human development index                       | SE – sleep efficiency                                       |
| Hz - hertz                                          | SCOPE – SCReening Of Pregnancy Endpoints                    |
| Kg – kilogram                                       | SOL – sleep onset latency                                   |
| L – litre                                           | TST – total nocturnal sleep time                            |
| MAES-I – maternal Actigraphy Exploratory<br>Study I | US – United States                                          |
| MEMS – microelectromechanical                       | USA – United States of America                              |
| MET – metabolic equivalent                          | w – week                                                    |
| METs – metabolic equivalents                        |                                                             |

### Competing interests

The authors declare that they have no competing interests.

### Authors' contributions

All authors contributed to the overall study design and specific methodologies. RTS, JGC, JM, MLC and JPS conceived the study design and wrote the first version of the study protocol. In a first meeting, the protocol was discussed and incorporated suggestions from RBG, FEF, ERF, DFL, JV, RPT and DSS. RTS, JGC, JM, and RBG planned the implementation of the study and developed the necessary material. RTS, JM, MLC and JGC drafted the manuscript that was afterwards revised by all other authors who gave suggestions. All authors discussed and made important contributions to the manuscript, read and approved the final version for submission.

### Acknowledgements

The MAES - I study group also included: Carina B Luiz and Luiza C Brust, School of Medicine, Federal University of Rio Grande do Sul, Porto Alegre, Brazil; Danilo Anacleto and Livia C Nascimento, School of Medicine, Federal University of Pernambuco, Recife, Brazil; Daisy Lucena and Denise Ellen F Cordeiro, School of Medicine, Federal University of Ceará, Fortaleza, Brazil; Mariana B Rogerio, Department of Obstetrics and Gynecology, Jundiaí Medical School, Jundiaí, Brazil.

### Funding

This study was granted by The Bill and Melinda Gates Foundation through the Grand Challenge Exploration program, call 19 (research grant OPP1182749).

For peer review only



## References

1. United Nations Development Programme (UNDP). Sustainable Development Goals. 2015. <http://www.un.org/sustainabledevelopment/health/>. Accessed 27 Apr 2016.
2. WHO, World Health Organization. Global Strategy. Global Strategy for Women's, Children's and Adolescents' Health, 2016 - 2030. 2015. <http://www.who.int/life-course/partners/global-strategy/global-strategy-2016-2030/en/>. Accessed 9 Jul 2016.
3. Pacagnella RC, Cecatti JG, Parpinelli MA, Sousa MH, Haddad SM, Costa ML, et al. Delays in receiving obstetric care and poor maternal outcomes: results from a national multicentre cross-sectional study. *BMC Pregnancy Childbirth*. 2014;14:159.
4. Haddad SM, Cecatti JG, Souza JP, Sousa MH, Parpinelli MA, Costa ML, et al. Applying the maternal near miss approach for the evaluation of quality of obstetric care: a worked example from a Multicenter Surveillance Study. *Biomed Res Int*. 2014;2014:989815.
5. Pacagnella RC, Cecatti JG, Osis MJ, Souza JP. The role of delays in severe maternal morbidity and mortality: expanding the conceptual framework. *Reprod Health Matters*. 2012;20:155–63.
6. Vogel JP, Souza JP, Mori R, Morisaki N, Lumbiganon P, Laopaiboon M, et al. Maternal complications and perinatal mortality: findings of the World Health Organization Multicountry Survey on Maternal and Newborn Health. *BJOG*. 2014;121 Suppl:76–88.
7. Souza JP, Gülmezoglu AM, Vogel J, Carroli G, Lumbiganon P, Qureshi Z, et al. Moving beyond essential interventions for reduction of maternal mortality (the WHO Multicountry Survey on Maternal and Newborn Health): a cross-sectional study. *Lancet*. 2013;381:1747–55.
8. Brosens I, Pijnenborg R, Vercruyse L, Romero R. The “Great Obstetrical Syndromes” are associated with disorders of deep placentation. *Am J Obstet Gynecol*. 2011;204:193–201.
9. Di Renzo GC. The great obstetrical syndromes. *J Matern neonatal Med*. 2009;22:633–5.
10. Loprinzi PD. The effects of objectively-measured, free-living daily ambulatory movement on mortality in a national sample of adults with diabetes. *Physiol Behav*. 2016;154:126–8.
11. Biswas A, Oh PI, Faulkner GE, Bajaj RR, Silver MA, Mitchell MS, et al. Sedentary Time and Its Association With Risk for Disease Incidence, Mortality, and Hospitalization in Adults. *Ann Intern Med*. 2015;162:123.
12. Hardin PE. From biological clock to biological rhythms. *Genome Biol*. 2000;1:reviews1023.1-1023.5.
13. Kizaki T, Sato S, Shirato K, Sakurai T, Ogasawara J, Izawa T, et al. Effect of Circadian Rhythm on Clinical and Pathophysiological Conditions and Inflammation. *Crit Rev Immunol*. 2015;35:261–75.
14. Baron KG, Reid KJ. Circadian misalignment and health. *Int Rev Psychiatry*. 2014;26:139–54.
15. Leproult R, Holmbäck U, Van Cauter E, McMenemy T, Suwazono Y, Dochi M, et al. Circadian misalignment augments markers of insulin resistance and inflammation,

- 1  
2  
3 independently of sleep loss. *Diabetes*. 2014;63:1860–9.  
4  
5 16. Diem SJ, Blackwell TL, Stone KL, Yaffe K, Tranah G, Cauley JA, et al. Measures  
6 of Sleep-Wake Patterns and Risk of Mild Cognitive Impairment or Dementia in Older  
7 Women. *Am J Geriatr Psychiatry*. 2016;24:248–58.  
8  
9 17. Haney A, Buysse DJ, Rosario BL, Chen Y-F, Okun ML. Sleep disturbance and  
10 cardiometabolic risk factors in early pregnancy: a preliminary study. *Sleep Med*.  
11 2014;15:444–50.  
12  
13 18. Lynch BM, Boyle T, Winkler E, Occleston J, Courneya KS, Vallance JK. Patterns  
14 and correlates of accelerometer-assessed physical activity and sedentary time among  
15 colon cancer survivors. *Cancer Causes Control*. 2016;27:59–68.  
16  
17 19. Palagini L, Gemignani A, Banti S, Manconi M, Mauri M, Riemann D. Chronic sleep  
18 loss during pregnancy as a determinant of stress: impact on pregnancy outcome. *Sleep*  
19 *Med*. 2014;15:853–9.  
20  
21 20. Tsai S-Y, Lin J-W, Wu W-W, Lee C-N, Lee P-L. Sleep Disturbances and  
22 Symptoms of Depression and Daytime Sleepiness in Pregnant Women. *Birth*.  
23 2016;43:176–83.  
24  
25 21. Tsai S-Y, Lee P-L, Lin J-W, Lee C-N. Cross-sectional and Longitudinal  
26 Associations between Sleep and Health-related Quality of Life in Pregnant Women: a  
27 Prospective Observational Study. *Int J Nurs Stud*. 2016;56:45–53.  
28  
29 22. Hayase M, Shimada M, Seki H. Sleep quality and stress in women with pregnancy-  
30 induced hypertension and gestational diabetes mellitus. *Women Birth*. 2014;27:190–5.  
31  
32 23. Mindell JA, Cook RA, Nikolovski J. Sleep patterns and sleep disturbances across  
33 pregnancy. *Sleep Med*. 2015;16:483–8.  
34  
35 24. JOHN D, FREEDSON P. ActiGraph and Actical Physical Activity Monitors. *Med*  
36 *Sci Sport Exerc*. 2012;44 1 Suppl 1:S86–9.  
37  
38 25. Martin JL, Hakim AD. Wrist actigraphy. *Chest*. 2011;139:1514–27.  
39  
40 26. Wood AC, Kuntsi J, Asherson P, Saudino KJ. Actigraph data are reliable, with  
41 functional reliability increasing with aggregation. *Behav Res Methods*. 2008;40:873–8.  
42  
43 27. Morgenthaler TI, Lee-Chiong T, Alessi C, Friedman L, Aurora RN, Boehlecke B, et  
44 al. Practice parameters for the clinical evaluation and treatment of circadian rhythm  
45 sleep disorders. An American Academy of Sleep Medicine report. *Sleep*.  
46 2007;30:1445–59.  
47  
48 28. Sadeh A. The role and validity of actigraphy in sleep medicine: an update. *Sleep*  
49 *Med Rev*. 2011;15:259–67.  
50  
51 29. Sani M, Refinetti R, Jean-Louis G, Pandi-Perumal SR, Durazo-Arvizu RA, Dugas  
52 LR, et al. Daily activity patterns of 2316 men and women from five countries differing  
53 in socioeconomic development. *Chronobiol Int*. 2015;32:650–6.  
54  
55 30. Hart TL, Swartz AM, Cashin SE, Strath SJ. How many days of monitoring predict  
56 physical activity and sedentary behaviour in older adults? *Int J Behav Nutr Phys Act*.  
57 2011;8:62.  
58  
59 31. Falck RS, Landry GJ, Brazendale K, Liu-Ambrose T. Measuring Physical Activity  
60 in Older Adults Using MotionWatch 8© Actigraphy: How Many Days are Needed? *J*  
*Aging Phys Act*. 2016.

- 1  
2  
3 32. Dillon CB, Fitzgerald AP, Kearney PM, Perry IJ, Rennie KL, Kozarski R, et al.  
4 Number of Days Required to Estimate Habitual Activity Using Wrist-Worn  
5 GENEActiv Accelerometer: A Cross-Sectional Study. *PLoS One*. 2016;11:e0109913.  
6  
7 33. Trost SG, Zheng Y, Wong W-K. Machine learning for activity recognition: hip  
8 versus wrist data. *Physiol Meas*. 2014;35:2183–9.  
9  
10 34. Ellis K, Kerr J, Godbole S, Staudenmayer J, Lanckriet G. Hip and Wrist  
11 Accelerometer Algorithms for Free-Living Behavior Classification. *Med Sci Sports  
12 Exerc*. 2016;48:933–40.  
13  
14 35. Rowlands A V, Cliff DP, Fairclough SJ, Boddy LM, Olds TS, Parfitt G, et al.  
15 Moving Forward with Backward Compatibility: Translating Wrist Accelerometer Data.  
16 *Med Sci Sports Exerc*. 2016.  
17  
18 36. Koster A, Shiroma EJ, Caserotti P, Matthews CE, Chen KY, Glynn NW, et al.  
19 Comparison of Sedentary Estimates between activPAL and Hip- and Wrist-Worn  
20 ActiGraph. *Med Sci Sports Exerc*. 2016;48:1514–22.  
21  
22 37. Haddad SM, Cecatti JG, Parpinelli MA, Souza JP, Costa ML, Sousa MH, et al.  
23 From planning to practice: building the national network for the Surveillance of Severe  
24 Maternal Morbidity. *BMC Public Health*. 2011;11:283.  
25  
26 38. Fisher M. A revealing map of the world's most and least ethnically diverse  
27 countries. *Washington Post*. 2013.  
28 [http://www.washingtonpost.com/blogs/worldviews/wp/2013/05/16/a-revealing-map-of-](http://www.washingtonpost.com/blogs/worldviews/wp/2013/05/16/a-revealing-map-of-the-worlds-most-and-least-ethnically-diverse-countries)  
29 [the-worlds-most-and-least-ethnically-diverse-countries](http://www.washingtonpost.com/blogs/worldviews/wp/2013/05/16/a-revealing-map-of-the-worlds-most-and-least-ethnically-diverse-countries). Accessed 25 Jul 2016.  
30  
31 39. United Nations Development Programme (UNDP). Human Development Index  
32 (HDI). Brazil. 2010. <http://www.pnud.org.br/Atlas.aspx>.  
33  
34 40. Wu J, Sigmund CD. Hypertension: A Disease That Strikes Around the Clock.  
35 *Hypertension*. 2016;67:493–5.  
36  
37 41. Danilack VA, Nunes AP, Phipps MG. Unexpected complications of low-risk  
38 pregnancies in the United States. *Am J Obstet Gynecol*. 2015;212:809.e1-809.e6.  
39  
40 42. Luft CDB, Sanches S de O, Mazo GZ, Andrade A. [Brazilian version of the  
41 Perceived Stress Scale: translation and validation for the elderly]. *Rev Saude Publica*.  
42 2007;41:606–15.  
43  
44 43. Pesce RP, Assis SG, Avanci JQ, Santos NC, Malaquias J V, Carvalhaes R. [Cross-  
45 cultural adaptation, reliability and validity of the resilience scale]. *Cad Saude Publica*.  
46 21:436–48.  
47  
48 44. Passini R, Cecatti JG, Lajos GJ, Tedesco RP, Nomura ML, Dias TZ, et al. Brazilian  
49 Multicentre Study on Preterm Birth (EMIP): Prevalence and Factors Associated with  
50 Spontaneous Preterm Birth. *PLoS One*. 2014;9:e109069.  
51  
52 45. Lisonkova S, Joseph KS. Incidence of preeclampsia: risk factors and outcomes  
53 associated with early- versus late-onset disease. *Am J Obstet Gynecol*.  
54 2013;209:544.e1-544.e12.  
55  
56 46. Belton S, O'Brien W, Wickel EE, Issartel J. Patterns of noncompliance in  
57 adolescent field-based accelerometer research. *J Phys Act Health*. 2013;10:1181–5.  
58  
59 47. Ellis K, Kerr J, Godbole S, Lanckriet G, Wing D, Marshall S, et al. A random forest  
60 classifier for the prediction of energy expenditure and type of physical activity from  
wrist and hip accelerometers. *Physiol Meas*. 2014;35:2191–203.

- 1  
2  
3 48. Staudenmayer J, He S, Hickey A, Sasaki J, Freedson P. Methods to estimate aspects  
4 of physical activity and sedentary behavior from high-frequency wrist accelerometer  
5 measurements. *J Appl Physiol*. 2015;119.  
6
- 7 49. Kamada M, Shiroma EJ, Harris TB, Lee I-M. Comparison of physical activity  
8 assessed using hip- and wrist-worn accelerometers. *Gait Posture*. 2016;44:23–8.  
9
- 10 50. Freedson PS, Melanson E, Sirard J. Calibration of the Computer Science and  
11 Applications, Inc. accelerometer. *Med Sci Sports Exerc*. 1998;30:777–81.  
12
- 13 51. Tranquilli AL, Dekker G, Magee L, Roberts J, Sibai BM, Steyn W, et al. The  
14 classification, diagnosis and management of the hypertensive disorders of pregnancy: A  
15 revised statement from the ISSHP. *Pregnancy Hypertens*. 2014;4:97–104.  
16
- 17 52. WHO recommendations on antenatal care for a positive pregnancy experience.  
18 World Health Organization. 2016.  
19 [http://www.who.int/reproductivehealth/publications/maternal\\_perinatal\\_health/anc-](http://www.who.int/reproductivehealth/publications/maternal_perinatal_health/anc-positive-pregnancy-experience/en/)  
20 [positive-pregnancy-experience/en/](http://www.who.int/reproductivehealth/publications/maternal_perinatal_health/anc-positive-pregnancy-experience/en/).  
21
- 22 53. North RA, McCowan LME, Dekker GA, Poston L, Chan EHY, Stewart AW, et al.  
23 Clinical risk prediction for pre-eclampsia in nulliparous women: development of model  
24 in international prospective cohort. *BMJ*. 2011;342:d1875.  
25
- 26 54. Murphy NM, McCarthy FP, Khashan AS, Myers JE, Simpson NAB, Kearney PM,  
27 et al. Compliance with National Institute of Health and Care Excellence risk-based  
28 screening for Gestational Diabetes Mellitus in nulliparous women. *Eur J Obstet*  
29 *Gynecol Reprod Biol*. 2016;199:60–5.  
30
- 31 55. McCowan LME, Roberts CT, Dekker GA, Taylor RS, Chan EHY, Kenny LC, et al.  
32 Risk factors for small-for-gestational-age infants by customised birthweight centiles:  
33 data from an international prospective cohort study. *BJOG*. 2010;117:1599–607.  
34
- 35 56. Thaddeus S, Maine D. Too far to walk: maternal mortality in context. *Soc Sci Med*.  
36 1994;38:1091–110.  
37
- 38 57. von Elm E, Altman DG, Egger M, Pocock SJ, Gøtzsche PC, Vandenbroucke JP. The  
39 Strengthening the Reporting of Observational Studies in Epidemiology (STROBE)  
40 statement: guidelines for reporting observational studies. *PLoS Med*. 2007;4:e296.  
41
- 42 58. Huberty J, Ehlers DK, Kurka J, Ainsworth B, Buman M, Gangwisch J, et al.  
43 Feasibility of three wearable sensors for 24 hour monitoring in middle-aged women.  
44 *BMC Womens Health*. 2015;15:55.  
45
- 46 59. Wright SP, Hall Brown TS, Collier SR, Sandberg K. How consumer physical  
47 activity monitors could transform human physiology research. *Am J Physiol Regul*  
48 *Integr Comp Physiol*. 2017;:ajpregu.00349.2016.  
49
- 50 60. Herring SJ, Foster GD, Pien GW, Massa K, Nelson DB, Gehrman PR, et al. Do  
51 pregnant women accurately report sleep time? A comparison between self-reported and  
52 objective measures of sleep duration in pregnancy among a sample of urban mothers.  
53 *Sleep Breath*. 2013;17:1323–7.  
54
- 55 61. Okun ML, Kline CE, Roberts JM, Wettlaufer B, Glover K, Hall M. Prevalence of  
56 sleep deficiency in early gestation and its associations with stress and depressive  
57 symptoms. *J women's Heal*. 2013;22:1028–37.  
58
- 59 62. Herring SJ, Nelson DB, Pien GW, Homko C, Goetzl LM, Davey A, et al.  
60 Objectively measured sleep duration and hyperglycemia in pregnancy. *Sleep Med*.

1  
2  
3 2014;15:51–5.  
4  
5  
6  
7  
8  
9  
10  
11  
12  
13  
14  
15  
16  
17  
18  
19  
20  
21  
22  
23  
24  
25  
26  
27  
28  
29  
30  
31  
32  
33  
34  
35  
36  
37  
38  
39  
40  
41  
42  
43  
44  
45  
46  
47  
48  
49  
50  
51  
52  
53  
54  
55  
56  
57  
58  
59  
60

For peer review only

**Table 1.** Participating centers in the Maternal Actigraphy Exploratory Study I (MAES-I)

|                                                                                                                                                                                                                                                                 |
|-----------------------------------------------------------------------------------------------------------------------------------------------------------------------------------------------------------------------------------------------------------------|
| <ul style="list-style-type: none"> <li>• The Maternity of CAISM, University of Campinas, in Campinas, SP, Brazil; <ul style="list-style-type: none"> <li>○ Local Principal Investigator: Maria Laura Costa.</li> </ul> </li> </ul>                              |
| <ul style="list-style-type: none"> <li>• Maternity of the Clinic Hospital, Federal University of RS, Porto Alegre, RS, Brazil; <ul style="list-style-type: none"> <li>○ Local Principal Investigator: Janete Vettorazzi.</li> </ul> </li> </ul>                 |
| <ul style="list-style-type: none"> <li>• Maternity of the University Hospital, Jundiaí Medical School in Jundiaí, SP, Brazil; <ul style="list-style-type: none"> <li>○ Local Principal Investigator: Ricardo Porto Tedesco.</li> </ul> </li> </ul>              |
| <ul style="list-style-type: none"> <li>• Maternity of Clinic Hospital, Federal University of Pernambuco, in Recife, PE, Brazil; <ul style="list-style-type: none"> <li>○ Local Principal Investigator: Edilberto A Rocha Filho.</li> </ul> </li> </ul>          |
| <ul style="list-style-type: none"> <li>• MEAC – School Maternity of the Federal University of Ceará, in Fortaleza, CE, Brazil. <ul style="list-style-type: none"> <li>○ Local Principal Investigator: Francisco Edson de Lucena Feitosa.</li> </ul> </li> </ul> |

**Table 2.** Inclusion and Exclusion Criteria of MAES – I

| Inclusion Criteria                                                                                                    |                                                      |
|-----------------------------------------------------------------------------------------------------------------------|------------------------------------------------------|
| • Singleton pregnancy                                                                                                 |                                                      |
| • Nulliparous (who had never given birth before)                                                                      |                                                      |
| • Between 19+0 – 21+0 weeks of gestation                                                                              |                                                      |
| Exclusion Criteria                                                                                                    |                                                      |
| • Unsure LMP and unwilling to have to date the Ultrasound                                                             | • Major Uterine Anomaly                              |
| • $\geq 3$ Miscarriages                                                                                               | • Cervical Suture                                    |
| • Major Fetal Anomaly/Abnormal Karyotype*                                                                             | • Knife cone biopsy                                  |
| • Essential Hypertension Treated Pre-pregnancy                                                                        | • Ruptured membranes                                 |
| • Mod-Severe Hypertension at booking ( $\geq 160/100$ mmHg) or Chronic hypertension using antihypertensive medication | • Use of long-term steroids                          |
| • Pre-pregnancy Diabetes                                                                                              | • Use of Low-dose Aspirin                            |
| • Renal Disease                                                                                                       | • Use of Calcium ( $> 1g/24h$ )                      |
| • Systemic Lupus Erythematosus                                                                                        | • Use of Eicosapentaenoic acid (fish oil) $> 2,7g$   |
| • Anti-phospholipid Syndrome                                                                                          | • Use of Vit. C $\geq 1000mg$ & Vit. E $\geq 400$ UI |
| • Sickle Cell Disease                                                                                                 | • Use of Heparin/LMW Heparin                         |
| • HIV or Hep B or Hep C positive                                                                                      | • Untreated Thyroid disease                          |
| • Any condition that limits practice of physical activity                                                             | • Use of antidepressant and/or anxiolytic agents     |

\* All information regarding fetal anomalies will be properly recorded

**Table 3.** Measurement frequency and maximum return periods according to gestational age – MAES I

| Gestational age | Measurement frequency | Maximum return period (weeks) |
|-----------------|-----------------------|-------------------------------|
| 19 – 32 weeks   | 20Hz                  | 4                             |
| 33 – 36 weeks   | 30Hz                  | 2                             |
| 37 – 42 weeks   | 50Hz                  | 1                             |



**Table 4.** Performance of wrist and hip actigraphy methods according to different activities

|                 | Hip   |       |       | Wrist |       |       |
|-----------------|-------|-------|-------|-------|-------|-------|
|                 | Sens  | Spec  | BA    | Sens  | Spec  | BA    |
| Sitting         | 0.894 | 0.923 | 0.908 | 0.883 | 0.870 | 0.876 |
| Vehicle         | 0.870 | 0.987 | 0.929 | 0.823 | 0.964 | 0.893 |
| Walking/running | 0.687 | 0.981 | 0.834 | 0.574 | 0.983 | 0.779 |
| Standing        | 0.797 | 0.929 | 0.851 | 0.687 | 0.904 | 0.795 |
| Average         | 0.812 | 0.955 | 0.881 | 0.742 | 0.930 | 0.836 |

BA: balanced accuracy; sens: sensitivity; spec: specificity

**Adapted from** Ellis K *et al.* Hip and Wrist Accelerometer Algorithms for Free-Living Behavior Classification. *Med. Sci. Sports Exerc.* 2016.

**Table 5.** Severe Neonatal Morbidity definition according to term/preterm status

| <b>Preterm</b>                                                                           | <b>Term</b>                                     |
|------------------------------------------------------------------------------------------|-------------------------------------------------|
| Grade III and IV intraventricular haemorrhage                                            | Grade II or III hypoxic ischemic encephalopathy |
| Chronic lung disease (home on O <sub>2</sub> or on O <sub>2</sub> at 36 weeks gestation) | Ventilation>24 hours                            |
| Necrotizing enterocolitis                                                                | Neonatal intensive care admission >4 days       |
| Retinopathy of prematurity, stage 3 or 4                                                 | Apgar score <4 at 5 mins                        |
| Sepsis (blood or CSF culture proven)                                                     | Cord arterial pH<7.0 and/or base excess>-15     |
| Cystic peri-ventricular leukomalacia                                                     | Neonatal seizures                               |

1  
2  
3 **Figure legends:**  
4  
5

6 **Figure 1.** Set points of MAES-I study  
7

8 **Figure 2.** Estimated prevalence of preterm birth and preeclampsia according to  
9 gestational age (RED represents majority of cases) and period of evaluation of PA and  
10 sleep patterns (in GREY)  
11  
12  
13  
14  
15  
16  
17  
18  
19  
20  
21  
22  
23  
24  
25  
26  
27  
28  
29  
30  
31  
32  
33  
34  
35  
36  
37  
38  
39  
40  
41  
42  
43  
44  
45  
46  
47  
48  
49  
50  
51  
52  
53  
54  
55  
56  
57  
58  
59  
60

For peer review only

1  
2  
3  
4  
5  
6  
7  
8  
9  
10  
11  
12  
13  
14  
15  
16  
17  
18  
19  
20  
21  
22  
23  
24  
25  
26  
27  
28  
29  
30  
31  
32  
33  
34  
35  
36  
37  
38  
39  
40  
41  
42  
43  
44  
45  
46  
47  
48  
49  
50  
51  
52  
53  
54  
55  
56  
57  
58  
59  
60



Figure 1

402x244mm (300 x 300 DPI)

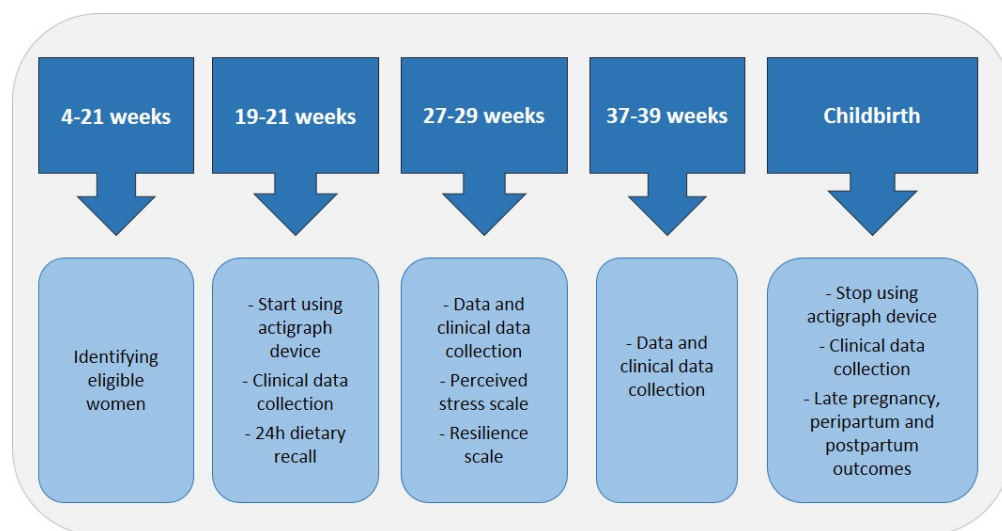

Figure 2

90x47mm (300 x 300 DPI)

**STROBE 2007 (v4) checklist of items to be included in reports of observational studies in epidemiology\***  
**Checklist for cohort, case-control, and cross-sectional studies (combined)**

| Section/Topic             | Item # | Recommendation                                                                                                                                                                                                                                                                                                          | Reported on page # |
|---------------------------|--------|-------------------------------------------------------------------------------------------------------------------------------------------------------------------------------------------------------------------------------------------------------------------------------------------------------------------------|--------------------|
| <b>Title and abstract</b> | 1      | (a) Indicate the study's design with a commonly used term in the title or the abstract                                                                                                                                                                                                                                  | 1,2                |
|                           |        | (b) Provide in the abstract an informative and balanced summary of what was done and what was found                                                                                                                                                                                                                     | 2                  |
| <b>Introduction</b>       |        |                                                                                                                                                                                                                                                                                                                         |                    |
| Background/rationale      | 2      | Explain the scientific background and rationale for the investigation being reported                                                                                                                                                                                                                                    | 4-6                |
| Objectives                | 3      | State specific objectives, including any pre-specified hypotheses                                                                                                                                                                                                                                                       | 6                  |
| <b>Methods</b>            |        |                                                                                                                                                                                                                                                                                                                         |                    |
| Study design              | 4      | Present key elements of study design early in the paper                                                                                                                                                                                                                                                                 | 1,2,7              |
| Setting                   | 5      | Describe the setting, locations, and relevant dates, including periods of recruitment, exposure, follow-up, and data collection                                                                                                                                                                                         | 7                  |
| Participants              | 6      | (a) <i>Case-control study</i> —Give the eligibility criteria, and the sources and methods of case ascertainment and control selection. Give the rationale for the choice of cases and controls<br><i>Cross-sectional study</i> —Give the eligibility criteria, and the sources and methods of selection of participants | 7,8                |
|                           |        | (b) <i>Case-control study</i> —For matched studies, give matching criteria and the number of controls per case                                                                                                                                                                                                          |                    |
| Variables                 | 7      | Clearly define all outcomes, exposures, predictors, potential confounders, and effect modifiers. Give diagnostic criteria, if applicable                                                                                                                                                                                | 11-15              |
| Data sources/ measurement | 8*     | For each variable of interest, give sources of data and details of methods of assessment (measurement). Describe comparability of assessment methods if there is more than one group                                                                                                                                    | 11-15              |
| Bias                      | 9      | Describe any efforts to address potential sources of bias                                                                                                                                                                                                                                                               | 16,17              |
| Study size                | 10     | Explain how the study size was arrived at                                                                                                                                                                                                                                                                               | 15                 |
| Quantitative variables    | 11     | Explain how quantitative variables were handled in the analyses. If applicable, describe which groupings were chosen and why                                                                                                                                                                                            | 13                 |
| Statistical methods       | 12     | (a) Describe all statistical methods, including those used to control for confounding                                                                                                                                                                                                                                   | 16,17              |
|                           |        | (b) Describe any methods used to examine subgroups and interactions                                                                                                                                                                                                                                                     | 16,17              |
|                           |        | (c) Explain how missing data were addressed                                                                                                                                                                                                                                                                             | 17                 |
|                           |        | (d) <i>Case-control study</i> —If applicable, explain how matching of cases and controls was addressed<br><i>Cross-sectional study</i> —If applicable, describe analytical methods taking account of sampling strategy                                                                                                  | n/a                |
|                           |        | (e) Describe any sensitivity analyses                                                                                                                                                                                                                                                                                   | n/a                |
| <b>Results</b>            |        |                                                                                                                                                                                                                                                                                                                         |                    |

|                          |     |                                                                                                                                                                                                                                                                                                                                                                                                               |       |
|--------------------------|-----|---------------------------------------------------------------------------------------------------------------------------------------------------------------------------------------------------------------------------------------------------------------------------------------------------------------------------------------------------------------------------------------------------------------|-------|
| Participants             | 13* | (a) Report numbers of individuals at each stage of study—eg numbers potentially eligible, examined for eligibility, confirmed eligible, included in the study, completing follow-up, and analysed<br>(b) Give reasons for non-participation at each stage<br>(c) Consider use of a flow diagram                                                                                                               | n/a   |
|                          |     |                                                                                                                                                                                                                                                                                                                                                                                                               | n/a   |
| Descriptive data         | 14* | (a) Give characteristics of study participants (eg demographic, clinical, social) and information on exposures and potential confounders<br>(b) Indicate number of participants with missing data for each variable of interest                                                                                                                                                                               | 7,8   |
|                          |     |                                                                                                                                                                                                                                                                                                                                                                                                               | n/a   |
| Outcome data             | 15* | <i>Case-control study</i> —Report numbers in each exposure category, or summary measures of exposure<br><i>Cross-sectional study</i> —Report numbers of outcome events or summary measures                                                                                                                                                                                                                    | n/a   |
|                          |     |                                                                                                                                                                                                                                                                                                                                                                                                               | n/a   |
| Main results             | 16  | (a) Give unadjusted estimates and, if applicable, confounder-adjusted estimates and their precision (eg, 95% confidence interval). Make clear which confounders were adjusted for and why they were included<br>(b) Report category boundaries when continuous variables were categorized<br>(c) If relevant, consider translating estimates of relative risk into absolute risk for a meaningful time period | n/a   |
|                          |     |                                                                                                                                                                                                                                                                                                                                                                                                               | n/a   |
| Other analyses           | 17  | Report other analyses done—eg analyses of subgroups and interactions, and sensitivity analyses                                                                                                                                                                                                                                                                                                                | 17    |
| <b>Discussion</b>        |     |                                                                                                                                                                                                                                                                                                                                                                                                               |       |
| Key results              | 18  | Summarise key results with reference to study objectives                                                                                                                                                                                                                                                                                                                                                      | n/a   |
| Limitations              | 19  | Discuss limitations of the study, taking into account sources of potential bias or imprecision. Discuss both direction and magnitude of any potential bias                                                                                                                                                                                                                                                    | 21    |
| Interpretation           | 20  | Give a cautious overall interpretation of results considering objectives, limitations, multiplicity of analyses, results from similar studies, and other relevant evidence                                                                                                                                                                                                                                    | 19-21 |
| Generalisability         | 21  | Discuss the generalisability (external validity) of the study results                                                                                                                                                                                                                                                                                                                                         | 21    |
| <b>Other information</b> |     |                                                                                                                                                                                                                                                                                                                                                                                                               |       |
| Funding                  | 22  | Give the source of funding and the role of the funders for the present study and, if applicable, for the original study on which the present article is based                                                                                                                                                                                                                                                 | 24    |

\*Give information separately for cases and controls in case-control studies and, if applicable, for exposed and unexposed groups in cohort and cross-sectional studies.

**Note:** An Explanation and Elaboration article discusses each checklist item and gives methodological background and published examples of transparent reporting. The STROBE checklist is best used in conjunction with this article (freely available on the Web sites of PLoS Medicine at <http://www.plosmedicine.org/>, Annals of Internal Medicine at <http://www.annals.org/>, and Epidemiology at <http://www.epidem.com/>). Information on the STROBE Initiative is available at [www.strobe-statement.org](http://www.strobe-statement.org).

# BMJ Open

## The identification of earlier predictors of pregnancy complications through wearable technologies in a Brazilian multicenter cohort: Maternal Actigraphy Exploratory Study I (MAES-I) study protocol

|                                 |                                                                                                                                                                                                                                                                                                                                                                                                                                                                                                                                                                                                                                                                                                                                                                                                                                                                                                                                                                                                                               |
|---------------------------------|-------------------------------------------------------------------------------------------------------------------------------------------------------------------------------------------------------------------------------------------------------------------------------------------------------------------------------------------------------------------------------------------------------------------------------------------------------------------------------------------------------------------------------------------------------------------------------------------------------------------------------------------------------------------------------------------------------------------------------------------------------------------------------------------------------------------------------------------------------------------------------------------------------------------------------------------------------------------------------------------------------------------------------|
| Journal:                        | <i>BMJ Open</i>                                                                                                                                                                                                                                                                                                                                                                                                                                                                                                                                                                                                                                                                                                                                                                                                                                                                                                                                                                                                               |
| Manuscript ID                   | bmjopen-2018-023101.R3                                                                                                                                                                                                                                                                                                                                                                                                                                                                                                                                                                                                                                                                                                                                                                                                                                                                                                                                                                                                        |
| Article Type:                   | Protocol                                                                                                                                                                                                                                                                                                                                                                                                                                                                                                                                                                                                                                                                                                                                                                                                                                                                                                                                                                                                                      |
| Date Submitted by the Author:   | 28-Feb-2019                                                                                                                                                                                                                                                                                                                                                                                                                                                                                                                                                                                                                                                                                                                                                                                                                                                                                                                                                                                                                   |
| Complete List of Authors:       | Souza, Renato; Universidade Estadual de Campinas, Obstetrics and Gynecology<br>Cecatti, Jose; University of Campinas, Obstetrics and Gynecology<br>Mayrink, Jussara; Universidade Estadual de Campinas Faculdade de Ciencias Medicas<br>Galvão, Rafael; Universidade Estadual de Campinas, Obstetrics and Gynecology<br>Costa, Maria Laura; Universidade Estadual de Campinas, Obstetrics and Gynecology<br>Feitosa, Francisco; Universidade Federal do Ceara, Maternidade Escola Rocha Filho, Edilberto; Universidade Federal de Pernambuco, Obstetrics and Gynecology<br>Leite, Debora; Universidade Federal de Pernambuco, Obstetrics and Gynecology<br>Vettorazzi, Janete; Universidade Federal do Rio Grande do Sul, Obstetrics and Gynecology<br>Tedesco, Ricardo; School of Medicine of Jundiai, Obstetrics and Gynecology<br>Santana, Danielly; Universidade Estadual de Campinas, Obstetrics and Gynecology<br>Souza, Joao Paulo; Universidade de Sao Paulo Faculdade de Medicina de Ribeirao Preto, Social Medicine |
| <b>Primary Subject Heading</b>: | Obstetrics and gynaecology                                                                                                                                                                                                                                                                                                                                                                                                                                                                                                                                                                                                                                                                                                                                                                                                                                                                                                                                                                                                    |
| Secondary Subject Heading:      | Obstetrics and gynaecology                                                                                                                                                                                                                                                                                                                                                                                                                                                                                                                                                                                                                                                                                                                                                                                                                                                                                                                                                                                                    |
| Keywords:                       | wearable technologies, actigraph, physical activity, sleep patterns, pregnancy complications                                                                                                                                                                                                                                                                                                                                                                                                                                                                                                                                                                                                                                                                                                                                                                                                                                                                                                                                  |
|                                 |                                                                                                                                                                                                                                                                                                                                                                                                                                                                                                                                                                                                                                                                                                                                                                                                                                                                                                                                                                                                                               |

SCHOLARONE™  
Manuscripts



1  
2  
3  
4  
5  
6  
7  
8  
9  
10  
11  
12  
13  
14  
15  
16  
17  
18  
19  
20  
21  
22  
23  
24  
25  
26  
27  
28  
29  
30  
31  
32  
33  
34  
35  
36  
37  
38  
39  
40  
41  
42  
43  
44  
45  
46  
47  
48  
49  
50  
51  
52  
53  
54  
55  
56  
57  
58  
59  
60

## STUDY PROTOCOL

### **The identification of earlier predictors of pregnancy complications through wearable technologies in a Brazilian multicenter cohort: Maternal Actigraphy Exploratory Study I (MAES-I) study protocol**

Renato T. Souza <sup>1</sup>, Jose G. Cecatti <sup>1#</sup>, Jussara Mayrink <sup>1</sup>, Rafael B. Galvao <sup>1</sup>, Maria L. Costa <sup>1</sup>, Francisco E. Feitosa <sup>2</sup>, Edilberto A Rocha Filho <sup>3</sup>, Débora F Leite <sup>1,3</sup>, Janete Vettorazzi <sup>4</sup>, Ricardo P Tedesco <sup>5</sup>, Danielly S Santana <sup>1,5</sup>, Joao P. Souza <sup>6</sup>, for the MAES-I Study Group\*

#### **Affiliations**

<sup>1</sup> Department of Obstetrics and Gynaecology, University of Campinas (UNICAMP) School of Medical Sciences, Campinas, SP, Brazil

<sup>2</sup> MEAC – School Maternity of the Federal University of Ceará, in Fortaleza, CE, Brazil

<sup>3</sup> Department of Maternal and Child Health, Maternity of Clinic Hospital, Federal University of Pernambuco, in Recife, PE, Brazil

<sup>4</sup> Department of Obstetrics and Gynaecology, Maternity of the Clinic Hospital, Federal University of RS, Porto Alegre, RS, Brazil

<sup>5</sup> Department of Obstetrics and Gynaecology, Jundiaí Medical School, Jundiaí, SP, Brazil

<sup>6</sup> Department of Social Medicine, Ribeirão Preto Medical School, University of Sao Paulo, Ribeirão Preto, SP, Brazil

\*Membership of the MAES-I study group is provided in the Acknowledgments.

**E-mail addresses:** RT Souza: [renatotsouzasp@gmail.com](mailto:renatotsouzasp@gmail.com); JG Cecatti: [cecatti@unicamp.br](mailto:cecatti@unicamp.br); J Mayrink: [jussaramayrink@gmail.com](mailto:jussaramayrink@gmail.com); RB Galvão: [rafaelbfg@gmail.com](mailto:rafaelbfg@gmail.com); ML Costa: [mlaura@unicamp.br](mailto:mlaura@unicamp.br); FE Feitosa: [edson.lucena@hotmail.com](mailto:edson.lucena@hotmail.com); EA Rocha Filho: [edilbertorochoa@globo.com](mailto:edilbertorochoa@globo.com); DF Leite: [debora.leite@ufpe.br](mailto:debora.leite@ufpe.br); J Vettorazzi: [janetev@terra.com.br](mailto:janetev@terra.com.br); RP Tedesco: [rp.tedesco@yahoo.com.br](mailto:rp.tedesco@yahoo.com.br); DS Santana: [dany.fmj@terra.com.br](mailto:dany.fmj@terra.com.br); JP Souza: [jp.souza@usp.br](mailto:jp.souza@usp.br)

#### **#Corresponding Author**

JG Cecatti

DO&G, University of Campinas

R. Alexander Fleming, 101

Campinas, SP, 13083-881

Brazil

E-mail: [cecatti@unicamp.br](mailto:cecatti@unicamp.br)

1  
2  
3  
4  
5  
6  
7  
8  
9  
10  
11  
12  
13  
14  
15  
16  
17  
18  
19  
20  
21  
22  
23  
24  
25  
26  
27  
28  
29  
30  
31  
32  
33  
34  
35  
36  
37  
38  
39  
40  
41  
42  
43  
44  
45  
46  
47  
48  
49  
50  
51  
52  
53  
54  
55  
56  
57  
58  
59  
60

## 1 **Abstract**

2 **Introduction:** Non-invasive tools capable of identifying predictors of maternal  
3 complications would be a step forward for improving maternal and perinatal health.  
4 There is an association between modification in physical activity (PA) and sleep-wake  
5 patterns and the occurrence of inflammatory, metabolic, pathologic conditions related  
6 to chronic diseases. The actigraphy device is validated to estimate PA and sleep-wake  
7 patterns among pregnant women. In order to extend the window of opportunity to  
8 prevent, diagnose and treat specific maternal conditions, would it be possible to use  
9 actigraphy data to identify risk factors for the development of adverse maternal  
10 outcomes during pregnancy?

11 **Methods and analysis:** A cohort will be held in 5 centres from the Brazilian Network for  
12 Studies on Reproductive and Perinatal Health. MAES-I will enroll 400 low-risk nulliparous  
13 women who will wear the actigraphy device on their wrists day and night (24h/day)  
14 uninterruptedly from 19-21 weeks until childbirth. Changes in PA and sleep-wake  
15 patterns will be analysed throughout pregnancy, considering ranges in gestational age  
16 in women with and without maternal complications such as preeclampsia, preterm birth  
17 (spontaneous or provider-initiated), gestational diabetes, maternal haemorrhage during  
18 pregnancy, in addition to perinatal outcomes. The plan is to design a predictive model  
19 using actigraphy data for screening pregnant women at risk of developing specific  
20 adverse maternal and perinatal outcomes.

21 **Ethics and Dissemination:** MAES-I study has been reviewed and approved by each  
22 Institutional Review Board (IRB) and also by the National Council for Ethics in Research.  
23 Detailed information about the study is provided in the Brazilian Cohort website  
24 ([www.medscinet.com/samba](http://www.medscinet.com/samba)) and findings will be published in the scientific literature  
25 and Institutional webpages.

26 **Keywords:** wearable technologies; actigraphy; physical activity; sleep patterns; sleep-  
27 wake cycle; prediction; pregnancy complications.

28  
29  
30

1  
2  
3  
4  
5  
6  
7  
8  
9  
10  
11  
12  
13  
14  
15  
16  
17  
18  
19  
20  
21  
22  
23  
24  
25  
26  
27  
28  
29  
30  
31  
32  
33  
34  
35  
36  
37  
38  
39  
40  
41  
42  
43  
44  
45  
46  
47  
48  
49  
50  
51  
52  
53  
54  
55  
56  
57  
58  
59  
60

## 1 **Strengths and limitations of this study**

- 2 • This multicentre cohort will collect comprehensive data on major maternal and  
3 perinatal complications such as pre-eclampsia, small for gestational age/fetal  
4 growth restriction, preterm birth and gestational diabetes mellitus.
- 5 • Physical activity and sleep patterns will be estimated by an innovative wearable  
6 device used in the natural environment of the study subject.
- 7 • Physical activity and sleep patterns will be estimated from the beginning of the  
8 second half of pregnancy until delivery, covering a wide interval during  
9 pregnancy, allowing for the study of changes in PA and sleep patterns  
10 throughout pregnancy.
- 11 • One possible limitation is the first half of pregnancy at a time when this  
12 information was not covered.

## 1 **Background**

2 Reducing the global maternal mortality ratio to less than 70 per 100,000 live births by  
3 2030 is one of the targets of the new United Nations Sustainable Development Goals  
4 [1]. Multiple challenges need to be tackled to achieve this target, but the 2016-2030  
5 health and development agenda goes well beyond mortality reduction. The aim of the  
6 Global Strategy for Women's, Children's and Adolescent's Health is to ensure that every  
7 newborn, woman, and child not only survives but thrives. This will only be possible if a  
8 transformative agenda centered on innovation is put into action [2].

9 One of the major challenges lies in optimizing earlier predictors and identifiers of  
10 maternal and perinatal complications. Delays in diagnosing and managing maternal  
11 complications have been associated with poor outcomes [3]. Decreased self-perception  
12 of clinical signs related to maternal complications, difficulties in accessing the health  
13 system and poor quality of care may contribute to late identification of complications  
14 and a worse prognosis. The development of a non-invasive Antenatal Care (ANC) tool  
15 for identifying maternal sub-clinical signs during pregnancy may provide a window of  
16 opportunity for an earlier identification of abnormal patterns of physiological  
17 parameters related to pregnancy complications. Earlier identification occurs when  
18 recognition is made before clinical presentation by standard criteria based on clinical  
19 signs, symptoms, and supplementary tests. Shortening the time between the onset of a  
20 complication and the initiation of appropriate management enables secondary  
21 prevention and reduction of maternal morbidity and mortality [3–7].

22 Pervasive computing (i.e. the trend towards embedding microprocessors in everyday-  
23 life objects so they can generate data) and wearable technology (i.e. clothing and  
24 accessories incorporating computer and advanced electronic technologies such as  
25 sensor wristbands and/or waistbands) are ubiquitous and can generate a new dataset  
26 that requires correlation with pregnancy outcomes. Preterm birth and preeclampsia are  
27 two important pregnancy complications that have a relatively long subclinical phase  
28 before the appearance of signs or symptoms [8, 9]. It is plausible that during subclinical  
29 phases of certain conditions the pattern of physical activity (PA) or sleep-wake rhythm  
30 is affected in some way and wearable devices could capture these changes. Although  
31 some studies have shown that PA patterns (actigraphy parameters) may be related to

1  
2  
3 1 systemic inflammation and diseases in the general population [10, 11], there is a paucity  
4  
5 2 of published literature that correlates wearable technology data with maternal  
6  
7 3 complications.

8  
9 4 The human circadian rhythm is regulated by endogenous physiological mechanisms and  
10  
11 5 environmental stimuli [12]. Solid evidence indicates that modification in circadian  
12  
13 6 rhythm or sleep and PA patterns are underlying conditions related to inflammatory,  
14  
15 7 degenerative and/or metabolic chronic diseases such as diabetes, hypertension, and  
16  
17 8 cancer [13]. Circadian misalignment is defined as inappropriately timed sleep and wake,  
18  
19 9 misplaced feeding periods and modification in physical activity behaviour.

20  
21 10 Determining a cause or effect relationship between these modifications and the  
22  
23 11 development of pathological conditions is a complex task. It seems that changes in  
24  
25 12 appetite-stimulating hormones, glucose metabolism, inflammatory markers, and mood  
26  
27 13 are some of the related pathways [13–15]. Leproult *et al.* evaluated the effect of  
28  
29 14 circadian misalignment on metabolic and inflammation markers in cardiovascular  
30  
31 15 disease [15]. Insulin action and release, and also levels of some inflammatory markers  
32  
33 16 that are predictors of cardiovascular disease, were abnormal in individuals with  
34  
35 17 circadian misalignment. The mechanisms involved in the association between changes  
36  
37 18 in PA pattern and pathologic conditions seem to have multiple etiologies. Sani *et al.*  
38  
39 19 assessed circadian rhythms of more than 2,300 African adult descendants. In addition  
40  
41 20 to the evaluation of physical activity itself, the aim of those authors was to identify  
42  
43 21 chronobiological patterns of adults from different socioeconomic settings. The study  
44  
45 22 described that chronobiological behaviour can vary depending on individual BMI,  
46  
47 23 socioeconomic background, work type and time of sunlight exposure. Many other  
48  
49 24 factors, such as pathologic conditions, may be potentially involved in a modification in  
50  
51 25 chronobiological behaviour. Some metabolic, cognitive, cardiovascular and other  
52  
53 26 chronic degenerative diseases have been associated with particular patterns of PA and  
54  
55 27 sleep [10, 11, 16–18]. A previous observational study assessed various sleep parameters  
56  
57 28 during pregnancy, e.g. sleep onset latency (SOL), wake after sleep onset (WASO) and  
58  
59 29 total nocturnal sleep time (TST). Difficulty in initiating sleep in early pregnancy was  
60  
30 associated with higher body mass index, greater weight gain and higher blood pressure  
31 during pregnancy [17]. Palagini *et al.* reviewed the clinical evidence between chronic

1  
2  
3  
4  
5  
6  
7  
8  
9  
10  
11  
12  
13  
14  
15  
16  
17  
18  
19  
20  
21  
22  
23  
24  
25  
26  
27  
28  
29  
30  
31  
32  
33  
34  
35  
36  
37  
38  
39  
40  
41  
42  
43  
44  
45  
46  
47  
48  
49  
50  
51  
52  
53  
54  
55  
56  
57  
58  
59  
60

1 sleep loss and adverse pregnancy outcomes, discussing common mechanisms of stress  
2 system activation [19]. Low-quality evidence suggests an association between sleep loss  
3 and prenatal depression, gestational diabetes, preeclampsia, abnormal length of labour,  
4 caesarean delivery, abnormal fetal growth, and preterm birth. Those results corroborate  
5 with other findings regarding pregnancy and sleep disorders [20–23].

6 Assessment of PA and sleep patterns can be performed by wearing small wrist (or waist)  
7 devices similar to a regular watch (actigraphy technology). More recently, substantial  
8 advance has been made in types of sensors, batteries, materials and output data,  
9 leading to lower cost, comfort, discretion and performance of the devices [24].  
10 Nowadays, portable, lightweight devices have a large capacity to store data, including  
11 software with automatic scoring algorithm packages for the detection of wakefulness,  
12 sleep periods and PA [24, 25]. Actigraphy estimation of PA and sleep patterns is  
13 validated as a proxy for chronobiological behaviour [26–29] and the use of an actigraphy  
14 device for 7 to 14 days provides reliable estimates of PA behaviour in older adults [30–  
15 32]. The performance of both hip and wrist devices has been shown to be reliable and  
16 acceptable for estimating PA and sleep-wake patterns [33–36].

17 The main advantages of using wearable devices for actigraphy are non-invasiveness,  
18 24/7 monitoring of PA and circadian patterns, and information about sleep habits and  
19 parameters in the natural environment of the subject [24, 25, 28]. We propose an  
20 innovative and strategic approach to monitor PA and sleep-wake patterns during  
21 pregnancy, establishing a large database comprised of clinical, epidemiological, PA and  
22 sleep-wake variables that are potentially capable of composing a prediction model for  
23 maternal complications during pregnancy. The main goal of this study is to identify  
24 earlier predictors of pregnancy complications by establishing a correlation between data  
25 on PA and sleep patterns using wearable devices (sensor wristbands) and maternal and  
26 perinatal complications and outcomes.

27  
28  
29

## 1 **Methods/Design**

### 2 ***Study design***

3 We will conduct a cohort study of 400 pregnant women using sensor wristbands  
4 capable of capturing information on daily physical activity and sleep patterns  
5 (exposure). This cohort study will be implemented in 5 ANC clinics linked to obstetric  
6 units in 3 different regions of Brazil that are already part of the Brazilian Network for  
7 Studies on Reproductive and Perinatal Health [37], as shown in Table 1. During an 8-  
8 month period, the ANC clinics will identify cases that are eligible to use the sensor  
9 wristband. Wearable technology data will be correlated with the occurrence of  
10 pregnancy and childbirth complications and outcomes, such as hypertensive  
11 disorders, gestational diabetes mellitus, fetal growth restriction and prematurity.

12 Eligible women will be identified up to 21 weeks of gestation and invited to participate  
13 in the study. A proper consent form will be applied and women who agree to participate  
14 will receive a sensor wristband to wear continuously from 19-21 weeks until childbirth.

### 15 ***Study setting and population***

16 Brazil is a multi-ethnic mixed-race population of diverse resourced settings [38]. Despite  
17 the high global overall human development index (HDI 0.727) in 2010, the HDI of  
18 Brazilian municipalities ranged from 0,862 to 0,418 [39]. A mixed population is suitable  
19 for exploring information on patterns of maternal mobility and sleep, maximizing  
20 external validity and comparisons to other populations. The following reasons support  
21 a study population of low-risk nulliparous women: 1) Previous obstetric history can refer  
22 to known risk factors for many maternal complications such as preterm birth,  
23 preeclampsia, and diabetes [13, 40]. Therefore, nulliparous women permit unbiased  
24 sampling regarding obstetric history. 2) Women with previous morbidities such as  
25 hypertension, diabetes, nephropathy or other chronic/degenerative diseases are more  
26 likely to present abnormalities in sleep-wake rhythms or physical activity patterns during  
27 pregnancy.



## 1 **Sampling**

2 The five participating centres are regional referral obstetric units responsible for  
3 antenatal care of mainly high-risk pregnant women. Participating centres are listed in  
4 Table 1. Nevertheless, there are primary health care units strategically linked to these  
5 participating centres, enabling the identification and enrolment of women with non-  
6 pathological pregnancies. Recruitment strategies include approaching all eligible  
7 women in these participating centres and their linked facilities. An informed consent  
8 form will be applied for women who agree to participate.

### 9 *Eligible women: Low-risk pregnant subjects*

10 There is a lack of international consensus on criteria for low-risk pregnancies, although  
11 several factors are known to be associated with maternal and perinatal adverse  
12 outcomes. A recent study evaluating complications of “low-risk” pregnancies of US  
13 Americans (10 million births from 2011 to 2013) indicated that 29% of low-risk women  
14 experienced an unexpected complication that required no routine obstetric/neonatal  
15 care [41]. This illustrates the difficulty in establishing a “low-risk profile” for  
16 maternal/perinatal complications. To make a better identification of eligible low-risk  
17 pregnant women, we excluded known potential confounders of pre-pregnancy  
18 conditions that could be related to adverse maternal or perinatal outcomes as shown in  
19 Table 2, so we could assess PA and sleep patterns of a mostly “normal” population.  
20 Nonetheless, features such as lifestyle habits and body composition (body mass index,  
21 height), and some non-severe chronic diseases including non-severe anaemia and/or  
22 asthma are not exclusion criteria in this study. However, these features and conditions  
23 may be a part of subgroup analyses (composition of any previous disorder, e.g.). Intra  
24 and inter-individual analyses of PA and sleep patterns can avoid possible bias by  
25 identifying potential confounders that may affect primary outcomes. A comparative  
26 analysis will be conducted, in which parameters of PA and sleep patterns will be  
27 collected in different stages of pregnancy from the same participant (intra-individual  
28 analysis) and compared to data collected at the same stage of pregnancy from different  
29 participants (inter-individual analysis).

30 Eligible women are to be enrolled at 04-21 weeks of gestation. Inclusion and exclusion  
31 criteria are shown in Table 2.

1

2

### 3 **Data collection methods**

4 Essentially, MAES I study is comprised of 4 key set points – 3 clinical visits during  
5 pregnancy and a postnatal visit. Clinical visits will be held at 1) 19-21 weeks; 2) 27-29  
6 weeks; and 3) 37-39 weeks. On the first, second, third and postnatal visits, additional  
7 information on maternal history, details of pregnancy complications, maternal  
8 biophysical data (weight, height, skinfolds) and adverse pregnancy outcomes will be  
9 collected following a specific Standard Operating Procedure (SOP) specially developed  
10 for MAES-I study. Furthermore, the Perceived Stress Scale [42] and Resilience Scale [43]  
11 will be applied during the 27-29 weeks visit. Figure 1 shows the set points of MAES-I  
12 study.

13 Eligible women will be invited to use a 43mmx40mmx13mm water-resistant wrist device  
14 similar to a regular watch (GENEActiv Original – Activinsights®). The device contains an  
15 accelerometer for PA calculation and sensors for estimation of sleep-wake patterns by  
16 light and temperature measurements, using a proper software algorithm.

17 At the first set point of MAES-I study (between 19+0 - 21+0 weeks of gestation), eligible  
18 women who agreed to participate will be instructed to wear the wrist bracelet device  
19 on the non-dominant wrist night and day (24h/day), uninterruptedly until childbirth  
20 (including bathing or recreational water activities). Participants will not need to press  
21 any buttons and functioning of the device requires no special care. The device will be  
22 configured to register physical activity and sleep-wake data automatically from the  
23 moment it is delivered to the participant during antenatal care visit. In addition, the  
24 battery charge will be held by the research assistant before delivering the device to the  
25 study participant.

26 The acquisition of actigraphy data can be performed in different frequencies (from 10Hz  
27 to 100Hz). Since the frequency of data acquisition has an impact on battery life of the  
28 device (inverse relationship), measurement frequency will be set according to  
29 gestational age of the participant (Table 3). This information will be registered in the  
30 database accordingly. Cumulative data will be downloaded during antenatal care visits,

1 according to maximum return periods shown in Table 3. Calculation of maximum return  
2 periods will be based on expected battery life. At each antenatal care visit, the used  
3 device will be returned to the research team and a new charged device will be provided  
4 to the participant.

5 A leaflet with detailed information and FAQ (Frequently asked questions) about the  
6 device will also be provided. Women will also have a cell phone number to call in case  
7 of any doubts regarding use of the device, or if any technical or medical concern arises.

8 During each antenatal care visit, the wrist device will be connected to a charge base  
9 which can be connected to a computer through an USB connection. All actigraphy data  
10 will be extracted to the computer as raw data “.bin” file. A proper open source software  
11 (Geneactiv Software®) will allow the conversion of this file into “.csv” compressed epoch  
12 files for each 30 minutes of registered data, which can be read in Excel® program. The  
13 actigraphy data will then be uploaded to an online database platform developed by  
14 MedSciNet®, where all clinical study data will also be registered.

15 The actigraphy software uses several algorithms to translate numerical information  
16 obtained from epoch files into physical activity and sleep-wake patterns, which will  
17 compose the independent variables of this study. This is a centralized, secure, internet-  
18 based database that allows several procedures for prospective and retrospective  
19 monitoring, hierarchical access (local user, general manager, etc.). The database will be  
20 translated into Portuguese and English, facilitating data collection for Portuguese-  
21 speaking teams and international monitoring. A correspondent paper form will be  
22 available for data collection if necessary (e.g. internet connection failure for instance).

### 23 *Decision to start monitoring PA and sleep patterns between 19-21weeks*

24 There are various underlying mechanisms involved in the development of maternal and  
25 perinatal adverse outcomes that will be assessed, such as preterm birth, preeclampsia,  
26 gestational diabetes, fetal growth restriction and small for gestational age. Each disease  
27 may have a different pre-clinical phase, depending on environmental and individual  
28 aspects. In this phase, there are no clinical signs or symptoms. So far, the study of  
29 adverse maternal and perinatal predictors has been focused on early pregnancy (first  
30 trimester, <14 weeks of gestation) to maximize the window of opportunity for the

1 performance of preventive interventions. However, we hypothesized that modifications  
2 in PA and/or sleep pattern due to underlying changes in maternal biological function  
3 might not be evident at a very early stage in pregnancy before the beginning of the pre-  
4 clinical phase. Our hypothesis is that changes might occur shortly before the  
5 manifestation of symptoms.

6 Furthermore, we took into account that major maternal complications, including  
7 preeclampsia, fetal growth restriction, and preterm birth, occur more commonly in late  
8 pregnancy and established the period between 19-21 weeks as an appropriate time to  
9 start assessment of PA and sleep patterns. A recent cross-sectional study conducted in  
10 20 referral centres in Brazil, including the five participating centres of this proposal,  
11 showed that the occurrence of preterm birth before 28 weeks comprised less than 1%  
12 of all births and less than 8% of all preterm births [44]. In addition, the early onset of  
13 preeclampsia (before 34 weeks of gestation) complicates less than 0.4% of all  
14 pregnancies, according to a large retrospective cohort of more than 450,000 deliveries  
15 in the USA [45]. Figure 2 outlines the predicted prevalence of preterm birth and  
16 preeclampsia in the second trimester. Clinical presentation, when classic symptoms and  
17 signs of a certain disease/complication occur, is highlighted by pregnancy in red. Our  
18 hypothesis is that alterations in PA and sleep patterns may occur closer to clinical  
19 presentation, still in the preclinical phase when there are no symptoms or signs.

20 Briefly, an exploratory study required an arbitrary decision about the interval for  
21 monitoring PA and sleep patterns. To that end, we considered that: 1) the main  
22 maternal/perinatal complications of interest occur in the second half of pregnancy,  
23 more precisely in late pregnancy (Figure 2); 2) any potential change in PA or sleep  
24 patterns occurred hypothetically days or weeks before the onset of maternal or  
25 perinatal complications. Then, we focused on monitoring women during the second half  
26 of pregnancy.

27 Thus, starting assessment at 19-21 weeks seems to be quite reasonable, providing a  
28 wide interval to monitor and predict major maternal and perinatal adverse outcomes.

29  
30 *Actigraphy device*

1  
2  
3 1 The actigraphy device that will be used for monitoring PA and sleep-wake patterns is the  
4  
5 2 GENEActiv Original (GENEActiv, Activinsights Ltd, Huntingdon, UK). The device has  
6  
7 3 multiple sensors including a microelectromechanical (MEMS) accelerometer,  
8  
9 4 temperature (linear active thermistor) and light (silicon photodiode) sensors, providing  
10  
11 5 crude raw data for a variety of applications.

### 6 *Wrist vs waist wear: advantages and performance*

7 Wrist-worn actigraphy devices are more comfortable to use during wake and sleep  
8 periods and provide the highest wear time compared to waist-worn monitors [33, 46].

9 A non-systematic review published in 2011 showed that actigraphy is a useful and  
10 reliable tool to assess sleep patterns and circadian rhythm disorders, although there are  
11 some limitations in the diagnosis of sleep disorders or measurement of sleep stages [25].

12 Actigraphy had a very good concordance with polysomnography for assessment of sleep  
13 parameters in healthy subjects (i.e., sensitivity >90% in estimating total sleep time). A  
14 recent study evaluated the concordance of physical activity estimation by wrist device  
15 in free-living settings in forty overweight or obese women [34]. Those women used both  
16 wrist and hip devices, and a small camera that captured participant behaviour for 7 days,  
17 monitoring physical activity behaviour (gold-standard comparison). There was a  
18 difference in hip and wrist machine learning (ML) classifiers, resulting from different  
19 methods/algorithms used to measure physical activity [34]. The sensitivity and  
20 specificity of hip and wrist estimations according to Ellis *et al* are shown in Table 4 [34].

21 Two years previously, the same author published a similar evaluation of 40 adult women  
22 and men, showing that hip and wrist accelerometers predicted types of PA with an  
23 average accuracy of 92.3% and 87.5% respectively [47].

24 Staudenmayer *et al* investigated 20 participants who also wore two devices (wrist and  
25 hip), and concluded that wrist actigraphy can estimate energy expenditure in an  
26 accurate and relatively precise manner [48]. Another study evaluated PA patterns in  
27 women at the top 40% or bottom 40% of the distribution of daily PA who wore wrist  
28 devices in a free-living environment. There was agreement in classification between hip  
29 and wrist accelerometers in about 75% of those women [49]. Additionally, total activity  
30 (counts per day) was moderately correlated (Spearman's  $r = 0.73$ ) with wrist-worn and  
31 hip-worn devices.

1 To the best of our knowledge, there are no systematic reviews or other high-quality  
2 evidence-based recommendations that support a particular method. Although a wrist-  
3 worn actigraphy device is not the most traditional method, it might be the best choice  
4 for assessment of prolonged periods of PA or sleep patterns, considering that it  
5 performs similarly to a waist-worn device. The current proposal has no intention of  
6 diagnosing pathological behaviours or diseases, but it plans to identify different patterns  
7 throughout pregnancy and in different subgroups of women. Evidence suggests that  
8 wrist-worn actigraphy devices can accurately and more comfortably estimate PA and  
9 sleep patterns, mainly during prolonged periods and in free-living environments.  
10 Therefore, the MAES-I study group adopted a wrist-worn device.

### 11 ***Main variables***

12 Independent variables assessed as potential predictors of maternal complications will  
13 be related to the sleep-wake cycle and mobility as:

#### 14 *“Sleep” variables*

- 15 - Sleep onset latency (SOL): time elapsed between full wakefulness and sleep.
- 16 - Total sleep time (TST): The amount of actual sleep time in a sleep episode (excluding  
17 time awake).
- 18 - Wake after sleep onset (WASO): defined as total amount of time awake after sleep.
- 19 - Sleep Efficiency (SE): the ratio between total sleep time and time in bed.

20 The actigraphy device collects many pieces of information related to body position and  
21 body movements to estimate the described sleep variables. The actigraphy software will  
22 then be used to analyse data and generate output variables.

#### 23 *“Physical activity” variables*

24 Actigraphy technology estimates physical activity through various parameters  
25 collected by the actigraphy device. Briefly, according to Freedson *et al*, the triaxial  
26 sensors stressed by acceleration forces can estimate movement intensity. The  
27 acceleration signal is converted to a digital signal and summed over a user-specified  
28 time interval (epoch). At the end of each epoch the activity count is stored. Then,  
29 according to count per minute (CPM) cut points, PA intensity can be categorized [50].

- 1  
2  
3 1 The software translates information into quantitative variables using appropriate  
4 algorithms as follows:  
5  
6  
7 3 - Sedentary (hours/day): the number of hours per day when the count per minute  
8 ranges from 0-99.  
9  
10  
11 5 - Light activity (hours/day): the number of hours per day when the count per  
12 minute ranges from 100 - 1951.  
13  
14  
15 7 - Moderate activity (minutes/day): the number of hours per day when the count  
16 per minute ranges from 1952 - 5724.  
17  
18  
19 9 - Vigorous activity (minutes/day): the number of hours per day when the count per  
20 minute ranges from 5725 - 9498.  
21  
22  
23  
24 11 - Very vigorous activity (minutes/day): the number of hours per day when the  
25 count per minute is 9499 -  $\infty$ .  
26  
27  
28 13 - MET rates: Metabolic Equivalents (METs) are also commonly used to express the  
29 intensity of physical activity. One MET is the energy cost of resting quietly, often  
30 defined by oxygen uptake as  $3.5 \text{ mL}\cdot\text{kg}^{-1}\cdot\text{min}^{-1}$ . MET rate expresses the working  
31 metabolic rate of subjects in comparison to their resting metabolic rate. Briefly,  
32 the triaxial piezoelectric sensors stressed by acceleration forces can estimate  
33 movement intensity, converted to oxygen consumption required to perform such  
34 a movement.  
35  
36  
37 18  
38  
39  
40  
41 20 - Step counts/day: estimated step counts per day (estimated by proper algorithms  
42 using accelerometer data.)  
43  
44

## 45 *Outcomes*

46  
47  
48 23 Primary outcomes are late pregnancy complications such as:

- 49  
50 24 - Preeclampsia: Hypertension after 20 weeks of gestation, systolic BP  $\geq 140\text{mmHg}$   
51 and/or diastolic BP  $\geq 90\text{mmHg}$  (Korotkoff V) on at least 2 occasions 4h apart with:  
52  
53 26 1) Proteinuria 300 mg/24h or spot urine protein: creatinine ratio  $30 \text{ mg}/\text{mmol}$   
54 creatinine or urine dipstick protein  $\geq (+)$  OR, in the absence of proteinuria,  
55  
56 27 hypertension and 2) any multi-system complication that are: Haematological  
57  
58 28 abnormalities; thrombocytopenia (platelets  $< 100 \times 10^9/\text{L}$ ); Disseminated  
59  
60 29

1  
2  
3 1 intravascular coagulation (DIC), and haemolysis; Liver disease: increased aspartate  
4 2 transaminase and/or alanine transaminase > 45 IU/L and/or severe right upper  
5 3 quadrant or epigastric pain, liver rupture; Neurological problems: eclampsia,  
6 4 imminent eclampsia (severe headache with hyperreflexia and persistent visual  
7 5 disturbance), cerebral haemorrhage; Acute renal insufficiency: new increase in  
8 6 serum creatinine to > 100 mmol/L antepartum or > 130 mmol/L postpartum;  
9 7 Pulmonary oedema confirmed by chest x-ray [51].

10 8 - Gestational Diabetes: new diabetes developing in pregnancy according to the WHO  
11 9 recommendation [52] that defines gestational diabetes as :

- 12 10 ○ Fasting plasma glucose  $\geq$  92 mg/dl, or
- 13 11 ○ 1-h plasma glucose tolerance test (75g load)  $\geq$  180 mg/dl, or
- 14 12 ○ 2-h plasma glucose tolerance test (75g load)  $\geq$  153 mg/dl.

15 13 - Spontaneous Preterm Birth: spontaneous onset of preterm labour or premature  
16 14 rupture of membranes leading to preterm birth, childbirth before 37 weeks of  
17 15 gestation.

18 16 - Provider-Initiated Preterm Birth: defined as childbirth occurring at less than 37  
19 17 weeks, medically indicated due to maternal/fetal compromise or both;

20 18 - Maternal Hemorrhage: Classified as 1) Antepartum haemorrhage defined as  
21 19 bleeding from the genital tract after 24 weeks of gestation; 2) Primary Postpartum  
22 20 haemorrhage defined as the loss of at least 500 ml blood from the genital tract  
23 21 within 24 hours of childbirth.

24 22 Secondary outcomes include childbirth variables and neonatal adverse outcomes such  
25 23 as fetal death, caesarean section, small for gestational age (defined as birth weight  
26 24 below percentile 10 for gestational age), Apgar score < 7 at 5 minutes, neonatal severe  
27 25 morbidity (Table 5) and neonatal mortality before discharge.

## 28 26 ***Plans for analyses***

### 29 27 *Sample size estimation*

30 28 This is an exploratory and innovative study focused on a specific population (pregnant  
31 29 women) and therefore there are no previously published parameters available for  
32 30 sample size estimation. Considering that the rate of pregnancy-related complications is  
33 31 3 to 20% (including preeclampsia, fetal growth restriction, gestational diabetes,



1  
2  
3 1 hemorrhage, preterm birth, etc.), assuming a large population (above 1 million pregnant  
4 women), an acceptable margin of error of 4%, involvement of 5 clusters (participating  
5 centres) and a 95% level of confidence, the study would require 384 women. Therefore,  
6 we rounded up this estimation to 400 initially low-risk pregnant women for enrolment  
7 in the study. We estimated the incidence of some main maternal complications  
8 considering the following studies:

- 9 - Pre-eclampsia: An international prospective cohort study with nulliparous women  
10 termed SCOPE used similar criteria for low-risk profile, with a 5% of incidence of pre-  
11 eclampsia [53].
- 12 - Preterm Birth: A recent cross-sectional study conducted in 20 referral obstetric  
13 centres in Brazil, including the five participating centres, showed that preterm birth  
14 was prevalent in 12.3% of all births [44].
- 15 - Gestational Diabetes: In the previously mentioned SCOPE international cohort, the  
16 prevalence of gestational diabetes was 8.9% in screened low-risk nulliparous  
17 women, according to the NICE guidelines [54].
- 18 - Fetal growth restriction/small for gestational age: the previously mentioned SCOPE  
19 international cohort had a prevalence of 10.7% of small for gestational age  
20 newborns, according to customized centiles of birthweight (<10%)[55].

### 21 *Details of Statistical Analysis*

22 According to the studies above, the predicted incidence of complications seems  
23 reasonable and reproducible in our cohort. Therefore, sample size estimation may  
24 ensure a sufficient number of cases of maternal and perinatal complications for the  
25 current proposal.

26 The epoch files obtained from Geneactv Software by reading data on sleep variables and  
27 physical activity parameters will be translated into numerical results and then averaged  
28 in 7-day periods. Therefore, only one value will be employed in statistical analysis for  
29 each variable per week of use of the wrist-worn device.

30 First, we will identify PA and sleep-wake patterns of women who did not develop  
adverse maternal or perinatal outcomes. This will permit the recognition of normal PA  
and sleep-wake patterns in a low-risk population without complications during

1 pregnancy. We will use the same population to analyse changes in PA and sleep-wake  
2 patterns throughout pregnancy, allowing for gestational age periods.

3 Subsequently, we will compare PA and sleep-wake patterns of women who developed  
4 specific adverse maternal or perinatal outcomes with those who did not have any  
5 complications. Differences between groups may be identified and used as potential  
6 markers for specific pregnancy complications.

7 Afterwards, we will analyse changes in PA and sleep-wake patterns of women who  
8 developed adverse maternal or perinatal outcomes throughout pregnancy, comparing  
9 patterns in an attempt to discover which changes occurred before the onset of  
10 symptoms that could be related to pregnancy complications. If possible, we will conduct  
11 a subgroup analysis including a subpopulation with a potentially higher risk for maternal  
12 complications (confounder variables), including obesity, smoking, etc.

13 Finally, we will develop a predictive model for screening pregnant women at risk of  
14 specific adverse maternal and perinatal outcomes using PA and sleep-wake data  
15 estimated by actigraphy technology.

16 Analysis will be performed using the actigraphy software that translates collected  
17 information into PA and sleep-wake parameters. In addition, sleep onset latency, wake  
18 after sleep onset and total sleep time as well as sleep efficiency will be compared  
19 between participants throughout pregnancy using the Friedman and Wilcoxon tests for  
20 paired samples. The ANOVA and t-test will be used to compare sleep parameters  
21 between participants per week of gestational age for repeated measures. The same  
22 tests will be applied to analyse quantitative data on the median number of hours per  
23 day that different types of physical activity (sedentary, light, moderate, vigorous and  
24 very vigorous) are performed, MET rates and estimate of steps/day through the entire  
25 gestational period examined, and the comparison between participants per week of  
26 gestational age. Also, we will address the sensitivity, specificity and likelihood ratio for  
27 altered PA and sleep patterns or for their changes throughout pregnancy.

### 28 ***Discontinuation of participants***

29 Criteria for discontinuation include:

- 30 - Withdrawal of consent;

1  
2  
3 1 - Irregular use of the actigraphy device for prolonged periods, less than 50% of the  
4 whole planned time. Information of improper use of the device will be recorded if  
5 2 women notify the MAES-I team. Otherwise, the low level of use of the device will be  
6 3 observed after data discharge during antenatal care visits.  
7 4

8  
9  
10 5 - Loss to follow-up, preventing us from downloading actigraphy data.  
11  
12

13 6 Women who decide to withdraw from follow-up care will be called by telephone and  
14 7 asked to return the wrist device. The last visit will be scheduled to regain the wrist  
15 8 monitor and direct the woman to a proper antenatal care service to continue medical  
16 9 consultations.  
17  
18

### 19 20 21 **Data and Sample Quality** 22

23 11 All entered data will be prospectively and retrospectively monitored by local research  
24 12 assistants and a global monitor. Internal consistency of variables will be constantly  
25 13 performed by database and error messages are automatically flagged. A local research  
26 14 assistant will be responsible for checking all forms and actigraphy data before locking  
27 15 forms, assuring the good quality of data (i.e. double-checking entered data and checking  
28 16 for inconsistencies between variables). The local principal investigator (PI) will be in  
29 17 charge of signing the case, which will then be incorporated into the final database. The  
30 18 University of Campinas will coordinate, implement and monitor the study in the five  
31 19 participating centres. A general manager and a global monitor are also part of the  
32 20 coordinating team. The local team of each participating centre is comprised of a Local PI  
33 21 and research assistants.  
34  
35

### 36 37 38 39 40 41 42 43 44 **Ethics and Dissemination** 45

46 23 MAES-I study focuses on low-risk nulliparous Brazilian pregnant women. Although  
47 24 classified as low risk for maternal and perinatal complications, these women are not free  
48 25 from suffering complications. Furthermore, first and second delays, defined as a delay  
49 26 in deciding to seek care and delay in reaching a health care facility [56], are not  
50 27 uncommon. A barrier is created between earlier recognition of symptoms and timely  
51 28 intervention for the successful treatment of potentially life-threatening conditions. We  
52 29 believe that women will feel encouraged, empowered and willing to participate in a  
53 30 study aimed at developing a potentially useful prenatal care tool to identify the risk for  
54  
55  
56  
57  
58  
59  
60

1  
2  
3 1 maternal and perinatal morbidity and mortality. Following national ethical regulations,  
4  
5 2 the participants will not receive any financial compensation.  
6

7 3 Women who agree to participate in the study will not have any disadvantage or  
8  
9 4 difficulties in prenatal care. On the contrary, they will receive a contact number to find  
10  
11 5 clinical researchers at any time (24/7 service), maintaining a closer contact with  
12  
13 6 researchers and care providers. The MAES-I team is committed to contact health care  
14  
15 7 providers if any potential complication arises.  
16

17 8 Participating women will not be held accountable for any loss, theft or damage to the  
18  
19 9 wrist device. These women will only be required to wear the device as a regular wrist-  
20  
21 10 watch and no self-damage is expected.  
22

23 11 Participating women will not be able to identify any PA or sleep parameters at any stage  
24  
25 12 of the study. Data can only be downloaded through proper licensed software of the  
26  
27 13 device. The actigraphy devices provided to participating women have a unique code  
28  
29 14 which will be recorded in the database along with the interval of use per woman.  
30  
31 15 Actigraphy data will be labelled using participant ID, device number, gestational age  
32  
33 16 when the device was initially used and the return date of each device. Codes, ID number  
34  
35 17 and numbers will ensure confidentiality of all participating women. The identity of all  
36  
37 18 women will be kept confidential.  
38

39 19 MAES-I study has been reviewed and approved by the National Committee for Ethics in  
40  
41 20 Research of Brazil (CONEP) and by the Institutional Review Board (IRB) of the  
42  
43 21 coordinating centre (Letter of approval 1.834.116 issued on 24<sup>th</sup> November 2016) and  
44  
45 22 of all other Brazilian participating centres. All women enrolled in the MAES-I cohort will  
46  
47 23 sign an informed consent form.  
48

49 24 Ethical principles of the Brazilian National Health Council (Resolution CNS 466/12) will be  
50  
51 25 upheld at every stage of this study. Anonymity of the source of information will be  
52  
53 26 guaranteed and the woman will receive care irrespective of her agreement to  
54  
55 27 participate in the study. The study also complies with the Declaration of Helsinki  
56  
57 28 amended in Hong Kong in 1989. Methodological and ethical aspects of MAES-I study  
58  
59 29 protocol were developed following STROBE guidelines [57].  
60

### 1 *Patient and Public Involvement*

2 Patients and the public were not involved in this study for the development of the  
3 research question and outcome measures. However, the choice of a wrist device was  
4 based on user preference as reported. Participants of the study will have access to  
5 information available at the open-access website.

6 Detailed information about the study is provided in the Brazilian Cohort website  
7 ([www.medscinet.com/samba](http://www.medscinet.com/samba)). Publications of the results of the study can be found in  
8 the scientific literature and Institutional webpages. We intend to disseminate our  
9 findings to a scientific peer-reviewed journal, general free access website, specialist  
10 conferences, and our funding agencies.

11

### 12 **Discussion**

13 Actigraphy is an innovative, non-invasive, non-operator dependent, wearable  
14 technology, that is capable of measuring diverse variables related to mobility, physical  
15 activity, sleep-wake, and circadian cycle patterns under real-life conditions. Actigraphy  
16 devices have a high sensitivity in detecting sleep-wake parameters and are currently  
17 highly recommended by the American Sleep Disorder Association for diagnosis and  
18 therapy response of circadian rhythm disorders [27, 28, 58]. Although some studies  
19 show that using the actigraphy device for 7 to 14 days provides reliable estimates of  
20 physical activity behaviour in older adults, it is not absolutely clear how many days are  
21 needed to estimate habitual PA by using the wrist/waist device during pregnancy. In  
22 general, it seems to depend mainly on the type of actigraphy device, wear location and  
23 target population [30, 33]. Nevertheless, MAES-I study will provide sufficient data to  
24 assess different patterns throughout pregnancy.

25 The use of wearable physical activity monitors has increased considerably, owing to  
26 interest in the relationship between the pathophysiology of diseases and patterns of  
27 physical activity and sleep. A recent study on the use of physical activity monitors in  
28 human physiology research unravels current and potential use of the actigraphy device.  
29 The device can be applied in strategies that promote a healthier behaviour or predict  
30 outcomes [59]. The authors conclude that physical activity monitors, as well as other

1  
2  
3 1 new 21<sup>st</sup> century technologies, have already transformed physiology research,  
4  
5 2 revolutionizing how we assess patients and opening new areas of interest. In addition,  
6  
7 3 the use of objective measures to evaluate habitual sleep duration and outcomes in  
8  
9 4 pregnancy is critical, considering recent reports of little agreement between objective  
10  
11 5 and subjective assessments of sleep time [60].

12  
13 6 Alterations in sleep patterns, including less deep sleep and more nocturnal awakenings  
14  
15 7 can be observed in pregnancy as early as in 10-12 weeks gestation [61]. Sleep  
16  
17 8 disturbances during pregnancy have been associated with preterm delivery, gestational  
18  
19 9 hypertensive disorders, glucose intolerance and increased risk of caesarean delivery  
20  
21 10 [19]. Shortened nocturnal sleep time was also associated with hyperglycemia [62].  
22  
23 11 Persistent sleep deprivation has been correlated with depressive symptoms and stress  
24  
25 12 perception by pregnant women [61]. These studies explored a correlation between PA  
26  
27 13 patterns and sleep disturbances that determine complications through a well-  
28  
29 14 established relationship between cause and effect. However, this correlation could not  
30  
31 15 always be adequately determined due to study design [17].

32  
33 16 In a distinct manner, the intent of our analysis is to discover whether a maternal  
34  
35 17 complication can be identified before the manifestation of its clinical signs, by evaluating  
36  
37 18 physical activity and/or sleep patterns modifications of pregnant women. Considering  
38  
39 19 existing evidence, we speculate that patterns of PA and/or sleep change days or weeks  
40  
41 20 before clinical presentation of the complication. In general, the signs and symptoms of  
42  
43 21 some maternal outcomes are part of the gold-standard criteria for diagnosis (high blood  
44  
45 22 pressure, proteinuria and/or edema in preeclampsia; premature contractions and  
46  
47 23 cervical ripening/dilation in preterm birth; abnormal placental blood flow and  
48  
49 24 insufficient fetal growth in Intrauterine Growth Restriction). We acknowledge that there  
50  
51 25 are potential confounders and limitations in predicting maternal and perinatal  
52  
53 26 complications using PA and sleep patterns estimated by actigraphy devices. The  
54  
55 27 population in our research is expected to have different subgroups of women with  
56  
57 28 different risks and associated factors contributing to maternal complications, such as  
58  
59 29 obesity, smoking habit, and with age under twenty or over forty years old, for instance.  
60  
30 None of those factors was considered an exclusion criterion. If possible, we intend to  
31  
conduct a subgroup analysis of the maternal subgroups, since they may have different

1  
2  
3  
4  
5  
6  
7  
8  
9  
10  
11  
12  
13  
14  
15  
16  
17  
18  
19  
20  
21  
22  
23  
24  
25  
26  
27  
28  
29  
30  
31  
32  
33  
34  
35  
36  
37  
38  
39  
40  
41  
42  
43  
44  
45  
46  
47  
48  
49  
50  
51  
52  
53  
54  
55  
56  
57  
58  
59  
60

1 PA and sleep patterns. Nonetheless, we decided to adopt a pragmatic approach and not  
2 exclude such a common factor from our sample.

3 The use of actigraphy device during prenatal visits has the potential to become a new  
4 tool for monitoring pregnant women. It may improve maternal health care and identify  
5 altered PA and/or sleep patterns. Changes can be objectively measured by actigraphy  
6 before the occurrence of signs and symptoms. The focus is on providing new technology  
7 to monitor the development of potential maternal complications. Other positive points  
8 in our study are the data collection period (from 19 weeks until delivery) and the low-  
9 risk profile of the cohort, enabling us to describe PA and sleep patterns in a low-risk  
10 pregnant population and make a better interpretation of actigraphy data among  
11 pregnant women. Current clinical and biological predictors of major maternal  
12 complications such as preeclampsia, preterm birth, maternal haemorrhage, and  
13 gestational diabetes still lack effective sensitivity and specificity.

14 If our hypothesis is confirmed, this will be an important step for introducing non-invasive  
15 screening procedures into prenatal care to identify women at higher risk for those  
16 conditions. Women could receive specific advice on the prevention and earlier detection  
17 of the condition, take immediate action and seek professional health care to receive  
18 appropriate treatment. This would avoid delays, the most significant factors  
19 contributing to low-quality health care in underprivileged women, which increase the  
20 still substantial burden of maternal morbidity and mortality. If we succeed in identifying  
21 “specific patterns of physical activity and sleep” that are predictors of pregnancy  
22 complications, further validation studies are recommended to assess the effectiveness  
23 of screening procedures in management of these conditions. In addition, MAES-I will  
24 permit further specific studies among a high-risk population and also help to identify the  
25 best gestational age for monitoring, targeting a specific gestational age interval.

26  
27  
28  
29

## 1 Abbreviations

|                                                     |                                                             |
|-----------------------------------------------------|-------------------------------------------------------------|
| ANC – antenatal care                                | min – minutes                                               |
| BMI – body mass index                               | mg – milligram                                              |
| BP – blood pressure                                 | mL – millilitre                                             |
| CPM – count per minute                              | mmol – millimole                                            |
| dL – decilitre                                      | NICE – National Institute for Health and<br>Care Excellence |
| FAQ – frequently asked questions                    | PA – physical activity                                      |
| h – hour                                            | PI – Principal investigator                                 |
| HDI – human development index                       | SE – sleep efficiency                                       |
| Hz - hertz                                          | SCOPE – SCReening Of Pregnancy Endpoints                    |
| Kg – kilogram                                       | SOL – sleep onset latency                                   |
| L – litre                                           | TST – total nocturnal sleep time                            |
| MAES-I – maternal Actigraphy Exploratory<br>Study I | US – United States                                          |
| MEMS – microelectromechanical                       | USA – United States of America                              |
| MET – metabolic equivalent                          | w – week                                                    |
| METs – metabolic equivalents                        |                                                             |

## Competing interests

The authors declare that they have no competing interests.

## Author contributions

All authors contributed to the overall study design and specific methodologies. RTS, JGC, JM, MLC and JPS conceived the study design and wrote the first version of the study protocol. In a first meeting, the protocol was discussed and incorporated suggestions from RBG, FEF, ERF, DFL, JV, RPT and DSS. RTS, JGC, JM, and RBG planned the implementation of the study and developed the necessary material. RTS, JM, MLC and JGC drafted the manuscript that was afterwards revised by all other authors who gave suggestions. All authors discussed and made important contributions to the manuscript, read and approved the final version for submission.



### Acknowledgements

The MAES - I study group also included: Carina B Luiz and Luiza C Brust, School of Medicine, Federal University of Rio Grande do Sul, Porto Alegre, Brazil; Danilo Anacleto and Lívia C Nascimento, School of Medicine, Federal University of Pernambuco, Recife, Brazil; Daisy Lucena and Denise Ellen F Cordeiro, School of Medicine, Federal University of Ceará, Fortaleza, Brazil; Mariana B Rogerio, Department of Obstetrics and Gynecology, Jundiaí Medical School, Jundiaí, Brazil.

### Funding

This study was funded by The Bill and Melinda Gates Foundation through the Grand Challenge Exploration program, call 19 (research grant OPP1182749).

For peer review only

## References

1. United Nations Development Programme (UNDP). Sustainable Development Goals. 2015. <http://www.un.org/sustainabledevelopment/health/>. Accessed 27 Apr 2016.
2. WHO, World Health Organization. Global Strategy. Global Strategy for Women's, Children's and Adolescents' Health, 2016 - 2030. 2015. <http://www.who.int/life-course/partners/global-strategy/global-strategy-2016-2030/en/>. Accessed 9 Jul 2016.
3. Pacagnella RC, Cecatti JG, Parpinelli MA, Sousa MH, Haddad SM, Costa ML, et al. Delays in receiving obstetric care and poor maternal outcomes: results from a national multicentre cross-sectional study. *BMC Pregnancy Childbirth*. 2014;14:159.
4. Haddad SM, Cecatti JG, Souza JP, Sousa MH, Parpinelli MA, Costa ML, et al. Applying the maternal near miss approach for the evaluation of quality of obstetric care: a worked example from a Multicenter Surveillance Study. *Biomed Res Int*. 2014;2014:989815.
5. Pacagnella RC, Cecatti JG, Osis MJ, Souza JP. The role of delays in severe maternal morbidity and mortality: expanding the conceptual framework. *Reprod Health Matters*. 2012;20:155–63.
6. Vogel JP, Souza JP, Mori R, Morisaki N, Lumbiganon P, Laopaiboon M, et al. Maternal complications and perinatal mortality: findings of the World Health Organization Multicountry Survey on Maternal and Newborn Health. *BJOG*. 2014;121 Suppl:76–88.
7. Souza JP, Gülmezoglu AM, Vogel J, Carroli G, Lumbiganon P, Qureshi Z, et al. Moving beyond essential interventions for reduction of maternal mortality (the WHO Multicountry Survey on Maternal and Newborn Health): a cross-sectional study. *Lancet*. 2013;381:1747–55.
8. Brosens I, Pijnenborg R, Vercruyse L, Romero R. The “Great Obstetrical Syndromes” are associated with disorders of deep placentation. *Am J Obstet Gynecol*. 2011;204:193–201.
9. Di Renzo GC. The great obstetrical syndromes. *J Matern neonatal Med*. 2009;22:633–5.
10. Loprinzi PD. The effects of objectively-measured, free-living daily ambulatory movement on mortality in a national sample of adults with diabetes. *Physiol Behav*. 2016;154:126–8.
11. Biswas A, Oh PI, Faulkner GE, Bajaj RR, Silver MA, Mitchell MS, et al. Sedentary Time and Its Association With Risk for Disease Incidence, Mortality, and Hospitalization in Adults. *Ann Intern Med*. 2015;162:123.
12. Hardin PE. From biological clock to biological rhythms. *Genome Biol*. 2000;1:reviews1023.1-1023.5.
13. Kizaki T, Sato S, Shirato K, Sakurai T, Ogasawara J, Izawa T, et al. Effect of Circadian Rhythm on Clinical and Pathophysiological Conditions and Inflammation. *Crit Rev Immunol*. 2015;35:261–75.
14. Baron KG, Reid KJ. Circadian misalignment and health. *Int Rev Psychiatry*. 2014;26:139–54.
15. Leproult R, Holmbäck U, Van Cauter E, McMenemy T, Suwazono Y, Dochi M, et al. Circadian misalignment augments markers of insulin resistance and inflammation,

- 1  
2  
3 independently of sleep loss. *Diabetes*. 2014;63:1860–9.  
4  
5 16. Diem SJ, Blackwell TL, Stone KL, Yaffe K, Tranah G, Cauley JA, et al. Measures  
6 of Sleep-Wake Patterns and Risk of Mild Cognitive Impairment or Dementia in Older  
7 Women. *Am J Geriatr Psychiatry*. 2016;24:248–58.  
8  
9 17. Haney A, Buysse DJ, Rosario BL, Chen Y-F, Okun ML. Sleep disturbance and  
10 cardiometabolic risk factors in early pregnancy: a preliminary study. *Sleep Med*.  
11 2014;15:444–50.  
12  
13 18. Lynch BM, Boyle T, Winkler E, Occleston J, Courneya KS, Vallance JK. Patterns  
14 and correlates of accelerometer-assessed physical activity and sedentary time among  
15 colon cancer survivors. *Cancer Causes Control*. 2016;27:59–68.  
16  
17 19. Palagini L, Gemignani A, Banti S, Manconi M, Mauri M, Riemann D. Chronic sleep  
18 loss during pregnancy as a determinant of stress: impact on pregnancy outcome. *Sleep*  
19 *Med*. 2014;15:853–9.  
20  
21 20. Tsai S-Y, Lin J-W, Wu W-W, Lee C-N, Lee P-L. Sleep Disturbances and  
22 Symptoms of Depression and Daytime Sleepiness in Pregnant Women. *Birth*.  
23 2016;43:176–83.  
24  
25 21. Tsai S-Y, Lee P-L, Lin J-W, Lee C-N. Cross-sectional and Longitudinal  
26 Associations between Sleep and Health-related Quality of Life in Pregnant Women: a  
27 Prospective Observational Study. *Int J Nurs Stud*. 2016;56:45–53.  
28  
29 22. Hayase M, Shimada M, Seki H. Sleep quality and stress in women with pregnancy-  
30 induced hypertension and gestational diabetes mellitus. *Women Birth*. 2014;27:190–5.  
31  
32 23. Mindell JA, Cook RA, Nikolovski J. Sleep patterns and sleep disturbances across  
33 pregnancy. *Sleep Med*. 2015;16:483–8.  
34  
35 24. JOHN D, FREEDSON P. ActiGraph and Actical Physical Activity Monitors. *Med*  
36 *Sci Sport Exerc*. 2012;44 1 Suppl 1:S86–9.  
37  
38 25. Martin JL, Hakim AD. Wrist actigraphy. *Chest*. 2011;139:1514–27.  
39  
40 26. Wood AC, Kuntsi J, Asherson P, Saudino KJ. Actigraph data are reliable, with  
41 functional reliability increasing with aggregation. *Behav Res Methods*. 2008;40:873–8.  
42  
43 27. Morgenthaler TI, Lee-Chiong T, Alessi C, Friedman L, Aurora RN, Boehlecke B, et  
44 al. Practice parameters for the clinical evaluation and treatment of circadian rhythm  
45 sleep disorders. An American Academy of Sleep Medicine report. *Sleep*.  
46 2007;30:1445–59.  
47  
48 28. Sadeh A. The role and validity of actigraphy in sleep medicine: an update. *Sleep*  
49 *Med Rev*. 2011;15:259–67.  
50  
51 29. Sani M, Refinetti R, Jean-Louis G, Pandi-Perumal SR, Durazo-Arvizu RA, Dugas  
52 LR, et al. Daily activity patterns of 2316 men and women from five countries differing  
53 in socioeconomic development. *Chronobiol Int*. 2015;32:650–6.  
54  
55 30. Hart TL, Swartz AM, Cashin SE, Strath SJ. How many days of monitoring predict  
56 physical activity and sedentary behaviour in older adults? *Int J Behav Nutr Phys Act*.  
57 2011;8:62.  
58  
59 31. Falck RS, Landry GJ, Brazendale K, Liu-Ambrose T. Measuring Physical Activity  
60 in Older Adults Using MotionWatch 8© Actigraphy: How Many Days are Needed? *J*  
*Aging Phys Act*. 2016.

- 1  
2  
3 32. Dillon CB, Fitzgerald AP, Kearney PM, Perry IJ, Rennie KL, Kozarski R, et al.  
4 Number of Days Required to Estimate Habitual Activity Using Wrist-Worn  
5 GENEActiv Accelerometer: A Cross-Sectional Study. *PLoS One*. 2016;11:e0109913.  
6  
7 33. Trost SG, Zheng Y, Wong W-K. Machine learning for activity recognition: hip  
8 versus wrist data. *Physiol Meas*. 2014;35:2183–9.  
9  
10 34. Ellis K, Kerr J, Godbole S, Staudenmayer J, Lanckriet G. Hip and Wrist  
11 Accelerometer Algorithms for Free-Living Behaviour Classification. *Med Sci Sports*  
12 *Exerc*. 2016;48:933–40.  
13  
14 35. Rowlands A V, Cliff DP, Fairclough SJ, Boddy LM, Olds TS, Parfitt G, et al.  
15 Moving Forward with Backward Compatibility: Translating Wrist Accelerometer Data.  
16 *Med Sci Sports Exerc*. 2016.  
17  
18 36. Koster A, Shiroma EJ, Caserotti P, Matthews CE, Chen KY, Glynn NW, et al.  
19 Comparison of Sedentary Estimates between activPAL and Hip- and Wrist-Worn  
20 ActiGraph. *Med Sci Sports Exerc*. 2016;48:1514–22.  
21  
22 37. Haddad SM, Cecatti JG, Parpinelli MA, Souza JP, Costa ML, Sousa MH, et al.  
23 From planning to practice: building the national network for the Surveillance of Severe  
24 Maternal Morbidity. *BMC Public Health*. 2011;11:283.  
25  
26 38. Fisher M. A revealing map of the world's most and least ethnically diverse  
27 countries. *Washington Post*. 2013.  
28 [http://www.washingtonpost.com/blogs/worldviews/wp/2013/05/16/a-revealing-map-of-](http://www.washingtonpost.com/blogs/worldviews/wp/2013/05/16/a-revealing-map-of-the-worlds-most-and-least-ethnically-diverse-countries)  
29 [the-worlds-most-and-least-ethnically-diverse-countries](http://www.washingtonpost.com/blogs/worldviews/wp/2013/05/16/a-revealing-map-of-the-worlds-most-and-least-ethnically-diverse-countries). Accessed 25 Jul 2016.  
30  
31 39. United Nations Development Programme (UNDP). Human Development Index  
32 (HDI). Brazil. 2010. <http://www.pnud.org.br/Atlas.aspx>.  
33  
34 40. Wu J, Sigmund CD. Hypertension: A Disease That Strikes Around the Clock.  
35 *Hypertension*. 2016;67:493–5.  
36  
37 41. Danilack VA, Nunes AP, Phipps MG. Unexpected complications of low-risk  
38 pregnancies in the United States. *Am J Obstet Gynecol*. 2015;212:809.e1-809.e6.  
39  
40 42. Luft CDB, Sanches S de O, Mazo GZ, Andrade A. [Brazilian version of the  
41 Perceived Stress Scale: translation and validation for the elderly]. *Rev Saude Publica*.  
42 2007;41:606–15.  
43  
44 43. Pesce RP, Assis SG, Avanci JQ, Santos NC, Malaquias J V, Carvalhaes R. [Cross-  
45 cultural adaptation, reliability and validity of the resilience scale]. *Cad Saude Publica*.  
46 21:436–48.  
47  
48 44. Passini R, Cecatti JG, Lajos GJ, Tedesco RP, Nomura ML, Dias TZ, et al. Brazilian  
49 Multicentre Study on Preterm Birth (EMIP): Prevalence and Factors Associated with  
50 Spontaneous Preterm Birth. *PLoS One*. 2014;9:e109069.  
51  
52 45. Lisonkova S, Joseph KS. Incidence of preeclampsia: risk factors and outcomes  
53 associated with early- versus late-onset disease. *Am J Obstet Gynecol*.  
54 2013;209:544.e1-544.e12.  
55  
56 46. Belton S, O'Brien W, Wickel EE, Issartel J. Patterns of noncompliance in  
57 adolescent field-based accelerometer research. *J Phys Act Health*. 2013;10:1181–5.  
58  
59 47. Ellis K, Kerr J, Godbole S, Lanckriet G, Wing D, Marshall S, et al. A random forest  
60 classifier for the prediction of energy expenditure and type of physical activity from  
wrist and hip accelerometers. *Physiol Meas*. 2014;35:2191–203.

- 1  
2  
3 48. Staudenmayer J, He S, Hickey A, Sasaki J, Freedson P. Methods to estimate aspects  
4 of physical activity and sedentary behavior from high-frequency wrist accelerometer  
5 measurements. *J Appl Physiol*. 2015;119.  
6  
7 49. Kamada M, Shiroma EJ, Harris TB, Lee I-M. Comparison of physical activity  
8 assessed using hip- and wrist-worn accelerometers. *Gait Posture*. 2016;44:23–8.  
9  
10 50. Freedson PS, Melanson E, Sirard J. Calibration of the Computer Science and  
11 Applications, Inc. accelerometer. *Med Sci Sports Exerc*. 1998;30:777–81.  
12  
13 51. Tranquilli AL, Dekker G, Magee L, Roberts J, Sibai BM, Steyn W, et al. The  
14 classification, diagnosis and management of the hypertensive disorders of pregnancy: A  
15 revised statement from the ISSHP. *Pregnancy Hypertens*. 2014;4:97–104.  
16  
17 52. WHO recommendations on antenatal care for a positive pregnancy experience.  
18 World Health Organization. 2016.  
19 [http://www.who.int/reproductivehealth/publications/maternal\\_perinatal\\_health/anc-](http://www.who.int/reproductivehealth/publications/maternal_perinatal_health/anc-positive-pregnancy-experience/en/)  
20 [positive-pregnancy-experience/en/](http://www.who.int/reproductivehealth/publications/maternal_perinatal_health/anc-positive-pregnancy-experience/en/).  
21  
22 53. North RA, McCowan LME, Dekker GA, Poston L, Chan EHY, Stewart AW, et al.  
23 Clinical risk prediction for pre-eclampsia in nulliparous women: development of model  
24 in international prospective cohort. *BMJ*. 2011;342:d1875.  
25  
26 54. Murphy NM, McCarthy FP, Khashan AS, Myers JE, Simpson NAB, Kearney PM,  
27 et al. Compliance with National Institute of Health and Care Excellence risk-based  
28 screening for Gestational Diabetes Mellitus in nulliparous women. *Eur J Obstet*  
29 *Gynecol Reprod Biol*. 2016;199:60–5.  
30  
31 55. McCowan LME, Roberts CT, Dekker GA, Taylor RS, Chan EHY, Kenny LC, et al.  
32 Risk factors for small-for-gestational-age infants by customised birthweight centiles:  
33 data from an international prospective cohort study. *BJOG*. 2010;117:1599–607.  
34  
35 56. Thaddeus S, Maine D. Too far to walk: maternal mortality in context. *Soc Sci Med*.  
36 1994;38:1091–110.  
37  
38 57. von Elm E, Altman DG, Egger M, Pocock SJ, Gøtzsche PC, Vandenbroucke JP. The  
39 Strengthening the Reporting of Observational Studies in Epidemiology (STROBE)  
40 statement: guidelines for reporting observational studies. *PLoS Med*. 2007;4:e296.  
41  
42 58. Huberty J, Ehlers DK, Kurka J, Ainsworth B, Buman M, Gangwisch J, et al.  
43 Feasibility of three wearable sensors for 24 hour monitoring in middle-aged women.  
44 *BMC Womens Health*. 2015;15:55.  
45  
46 59. Wright SP, Hall Brown TS, Collier SR, Sandberg K. How consumer physical  
47 activity monitors could transform human physiology research. *Am J Physiol Regul*  
48 *Integr Comp Physiol*. 2017;;ajpregu.00349.2016.  
49  
50 60. Herring SJ, Foster GD, Pien GW, Massa K, Nelson DB, Gehrman PR, et al. Do  
51 pregnant women accurately report sleep time? A comparison between self-reported and  
52 objective measures of sleep duration in pregnancy among a sample of urban mothers.  
53 *Sleep Breath*. 2013;17:1323–7.  
54  
55 61. Okun ML, Kline CE, Roberts JM, Wettlaufer B, Glover K, Hall M. Prevalence of  
56 sleep deficiency in early gestation and its associations with stress and depressive  
57 symptoms. *J Women's Heal*. 2013;22:1028–37.  
58  
59 62. Herring SJ, Nelson DB, Pien GW, Homko C, Goetzl LM, Davey A, et al.  
60 Objectively measured sleep duration and hyperglycemia in pregnancy. *Sleep Med*.

2014;15:51–5.

For peer review only

1  
2  
3  
4  
5  
6  
7  
8  
9  
10  
11  
12  
13  
14  
15  
16  
17  
18  
19  
20  
21  
22  
23  
24  
25  
26  
27  
28  
29  
30  
31  
32  
33  
34  
35  
36  
37  
38  
39  
40  
41  
42  
43  
44  
45  
46  
47  
48  
49  
50  
51  
52  
53  
54  
55  
56  
57  
58  
59  
60

**Table 1.** Participating centres in the Maternal Actigraphy Exploratory Study I (MAES-I)

|                                                                                                                                                                                                                                                                 |
|-----------------------------------------------------------------------------------------------------------------------------------------------------------------------------------------------------------------------------------------------------------------|
| <ul style="list-style-type: none"> <li>• The Maternity of CAISM, University of Campinas, in Campinas, SP, Brazil; <ul style="list-style-type: none"> <li>○ Local Principal Investigator: Maria Laura Costa.</li> </ul> </li> </ul>                              |
| <ul style="list-style-type: none"> <li>• Maternity of the Clinic Hospital, Federal University of RS, Porto Alegre, RS, Brazil; <ul style="list-style-type: none"> <li>○ Local Principal Investigator: Janete Vettorazzi.</li> </ul> </li> </ul>                 |
| <ul style="list-style-type: none"> <li>• Maternity of the University Hospital, Jundiaí Medical School in Jundiaí, SP, Brazil; <ul style="list-style-type: none"> <li>○ Local Principal Investigator: Ricardo Porto Tedesco.</li> </ul> </li> </ul>              |
| <ul style="list-style-type: none"> <li>• Maternity of Clinic Hospital, Federal University of Pernambuco, in Recife, PE, Brazil; <ul style="list-style-type: none"> <li>○ Local Principal Investigator: Edilberto A Rocha Filho.</li> </ul> </li> </ul>          |
| <ul style="list-style-type: none"> <li>• MEAC – School Maternity of the Federal University of Ceará, in Fortaleza, CE, Brazil. <ul style="list-style-type: none"> <li>○ Local Principal Investigator: Francisco Edson de Lucena Feitosa.</li> </ul> </li> </ul> |

**Table 2.** Inclusion and Exclusion Criteria of MAES – I

| Inclusion Criteria                                                                                                                                                                                                                                                                                                                                                                                                                                                                                                                                                                                                                                                                                 |                                                                                                                                                                                                                                                                                                                                                                                                                                                                                                                                                                                                     |
|----------------------------------------------------------------------------------------------------------------------------------------------------------------------------------------------------------------------------------------------------------------------------------------------------------------------------------------------------------------------------------------------------------------------------------------------------------------------------------------------------------------------------------------------------------------------------------------------------------------------------------------------------------------------------------------------------|-----------------------------------------------------------------------------------------------------------------------------------------------------------------------------------------------------------------------------------------------------------------------------------------------------------------------------------------------------------------------------------------------------------------------------------------------------------------------------------------------------------------------------------------------------------------------------------------------------|
| <ul style="list-style-type: none"> <li>• Singleton pregnancy</li> <li>• Nulliparous (who had never given birth before)</li> <li>• Between 19+0 – 21+0 weeks of gestation</li> </ul>                                                                                                                                                                                                                                                                                                                                                                                                                                                                                                                |                                                                                                                                                                                                                                                                                                                                                                                                                                                                                                                                                                                                     |
| Exclusion Criteria                                                                                                                                                                                                                                                                                                                                                                                                                                                                                                                                                                                                                                                                                 |                                                                                                                                                                                                                                                                                                                                                                                                                                                                                                                                                                                                     |
| <ul style="list-style-type: none"> <li>• Unsure LMP and unwilling to date the Ultrasound</li> <li>• <math>\geq 3</math> Miscarriages</li> <li>• Major Fetal Anomaly/Abnormal Karyotype*</li> <li>• Essential Hypertension treated before pregnancy</li> <li>• Mod-Severe Hypertension at booking (<math>\geq 160/100</math> mmHg) or Chronic hypertension using antihypertensive medication</li> <li>• Pre-pregnancy Diabetes</li> <li>• Renal Disease</li> <li>• Systemic Lupus Erythematosus</li> <li>• Anti-phospholipid Syndrome</li> <li>• Sickle Cell Disease</li> <li>• HIV or Hep B or Hep C positive</li> <li>• Any condition that limits the performance of physical activity</li> </ul> | <ul style="list-style-type: none"> <li>• Major Uterine Anomaly</li> <li>• Cervical Suture</li> <li>• Knife cone biopsy</li> <li>• Ruptured membranes</li> <li>• Use of long-term steroids</li> <li>• Use of Low-dose Aspirin</li> <li>• Use of Calcium (<math>&gt; 1g/24h</math>)</li> <li>• Use of Eicosapentaenoic acid (fish oil) <math>&gt; 2,7g</math></li> <li>• Use of Vit. C <math>\geq 1000mg</math> &amp; Vit. E <math>\geq 400</math> UI</li> <li>• Use of Heparin/LMW Heparin</li> <li>• Untreated Thyroid disease</li> <li>• Use of antidepressant and/or anxiolytic agents</li> </ul> |

\* All information on fetal anomalies will be properly recorded



**Table 3.** Measurement frequency and maximum return periods according to gestational age – MAES I

| Gestational age | Measurement frequency | Maximum return period (weeks) |
|-----------------|-----------------------|-------------------------------|
| 19 – 32 weeks   | 20Hz                  | 4                             |
| 33 – 36 weeks   | 30Hz                  | 2                             |
| 37 – 42 weeks   | 50Hz                  | 1                             |

**Table 4.** Performance of wrist and hip actigraphy methods according to different activities

|                 | Hip   |       |       | Wrist |       |       |
|-----------------|-------|-------|-------|-------|-------|-------|
|                 | Sens  | Spec  | BA    | Sens  | Spec  | BA    |
| Sitting         | 0.894 | 0.923 | 0.908 | 0.883 | 0.870 | 0.876 |
| Vehicle         | 0.870 | 0.987 | 0.929 | 0.823 | 0.964 | 0.893 |
| Walking/running | 0.687 | 0.981 | 0.834 | 0.574 | 0.983 | 0.779 |
| Standing        | 0.797 | 0.929 | 0.851 | 0.687 | 0.904 | 0.795 |
| Average         | 0.812 | 0.955 | 0.881 | 0.742 | 0.930 | 0.836 |

BA: balanced accuracy; sens: sensitivity; spec: specificity

**Adapted from** Ellis K *et al.* Hip and Wrist Accelerometer Algorithms for Free-Living Behaviour Classification. *Med. Sci. Sports Exerc.* 2016.

**Table 5.** Severe Neonatal Morbidity definition according to term/preterm status

| <b>Preterm</b>                                                                                     | <b>Term</b>                                     |
|----------------------------------------------------------------------------------------------------|-------------------------------------------------|
| Grade III and IV intraventricular haemorrhage                                                      | Grade II or III hypoxic ischemic encephalopathy |
| Chronic lung disease (home O <sub>2</sub> therapy or O <sub>2</sub> therapy at 36 weeks gestation) | Ventilation>24 hours                            |
| Necrotizing enterocolitis                                                                          | Neonatal intensive care admission >4 days       |
| Retinopathy of prematurity, stage 3 or 4                                                           | Apgar score <4 at 5 mins                        |
| Sepsis (blood or CSF culture proven)                                                               | Cord arterial pH<7.0 and/or base excess>-15     |
| Cystic peri-ventricular leukomalacia                                                               | Neonatal seizures                               |

1  
2  
3 **Figure legends:**  
4  
5

6 **Figure 1.** Set points of MAES-I study  
7

8 **Figure 2.** Estimated prevalence of preterm birth and preeclampsia according to  
9 gestational age (RED represents the majority of cases) and evaluation period of PA and  
10 sleep patterns (in GREY)  
11  
12  
13  
14  
15  
16  
17  
18  
19  
20  
21  
22  
23  
24  
25  
26  
27  
28  
29  
30  
31  
32  
33  
34  
35  
36  
37  
38  
39  
40  
41  
42  
43  
44  
45  
46  
47  
48  
49  
50  
51  
52  
53  
54  
55  
56  
57  
58  
59  
60

For peer review only

1  
2  
3  
4  
5  
6  
7  
8  
9  
10  
11  
12  
13  
14  
15  
16  
17  
18  
19  
20  
21  
22  
23  
24  
25  
26  
27  
28  
29  
30  
31  
32  
33  
34  
35  
36  
37  
38  
39  
40  
41  
42  
43  
44  
45  
46  
47  
48  
49  
50  
51  
52  
53  
54  
55  
56  
57  
58  
59  
60



Figure 1

402x244mm (300 x 300 DPI)

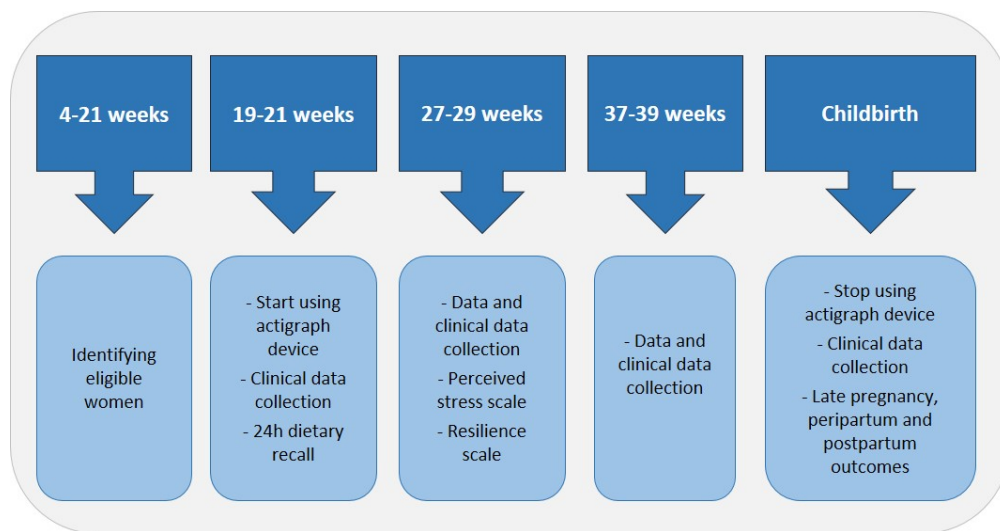

Figure 2

90x47mm (300 x 300 DPI)

**STROBE 2007 (v4) checklist of items to be included in reports of observational studies in epidemiology\***  
**Checklist for cohort, case-control, and cross-sectional studies (combined)**

| Section/Topic             | Item # | Recommendation                                                                                                                                                                                                                                                                                                          | Reported on page # |
|---------------------------|--------|-------------------------------------------------------------------------------------------------------------------------------------------------------------------------------------------------------------------------------------------------------------------------------------------------------------------------|--------------------|
| <b>Title and abstract</b> | 1      | (a) Indicate the study’s design with a commonly used term in the title or the abstract                                                                                                                                                                                                                                  | 1,2                |
|                           |        | (b) Provide in the abstract an informative and balanced summary of what was done and what was found                                                                                                                                                                                                                     | 2                  |
| <b>Introduction</b>       |        |                                                                                                                                                                                                                                                                                                                         |                    |
| Background/rationale      | 2      | Explain the scientific background and rationale for the investigation being reported                                                                                                                                                                                                                                    | 4-6                |
| Objectives                | 3      | State specific objectives, including any pre-specified hypotheses                                                                                                                                                                                                                                                       | 6                  |
| <b>Methods</b>            |        |                                                                                                                                                                                                                                                                                                                         |                    |
| Study design              | 4      | Present key elements of study design early in the paper                                                                                                                                                                                                                                                                 | 1,2,7              |
| Setting                   | 5      | Describe the setting, locations, and relevant dates, including periods of recruitment, exposure, follow-up, and data collection                                                                                                                                                                                         | 7                  |
| Participants              | 6      | (a) <i>Case-control study</i> —Give the eligibility criteria, and the sources and methods of case ascertainment and control selection. Give the rationale for the choice of cases and controls<br><i>Cross-sectional study</i> —Give the eligibility criteria, and the sources and methods of selection of participants | 7,8                |
|                           |        | (b) <i>Case-control study</i> —For matched studies, give matching criteria and the number of controls per case                                                                                                                                                                                                          |                    |
| Variables                 | 7      | Clearly define all outcomes, exposures, predictors, potential confounders, and effect modifiers. Give diagnostic criteria, if applicable                                                                                                                                                                                | 11-15              |
| Data sources/ measurement | 8*     | For each variable of interest, give sources of data and details of methods of assessment (measurement). Describe comparability of assessment methods if there is more than one group                                                                                                                                    | 11-15              |
| Bias                      | 9      | Describe any efforts to address potential sources of bias                                                                                                                                                                                                                                                               | 16,17              |
| Study size                | 10     | Explain how the study size was arrived at                                                                                                                                                                                                                                                                               | 15                 |
| Quantitative variables    | 11     | Explain how quantitative variables were handled in the analyses. If applicable, describe which groupings were chosen and why                                                                                                                                                                                            | 13                 |
| Statistical methods       | 12     | (a) Describe all statistical methods, including those used to control for confounding                                                                                                                                                                                                                                   | 16,17              |
|                           |        | (b) Describe any methods used to examine subgroups and interactions                                                                                                                                                                                                                                                     | 16,17              |
|                           |        | (c) Explain how missing data were addressed                                                                                                                                                                                                                                                                             | 17                 |
|                           |        | (d) <i>Case-control study</i> —If applicable, explain how matching of cases and controls was addressed<br><i>Cross-sectional study</i> —If applicable, describe analytical methods taking account of sampling strategy                                                                                                  | n/a                |
|                           |        | (e) Describe any sensitivity analyses                                                                                                                                                                                                                                                                                   | n/a                |
| <b>Results</b>            |        |                                                                                                                                                                                                                                                                                                                         |                    |

|                          |     |                                                                                                                                                                                                                                                                                                                                                                                                               |       |
|--------------------------|-----|---------------------------------------------------------------------------------------------------------------------------------------------------------------------------------------------------------------------------------------------------------------------------------------------------------------------------------------------------------------------------------------------------------------|-------|
| Participants             | 13* | (a) Report numbers of individuals at each stage of study—eg numbers potentially eligible, examined for eligibility, confirmed eligible, included in the study, completing follow-up, and analysed<br>(b) Give reasons for non-participation at each stage<br>(c) Consider use of a flow diagram                                                                                                               | n/a   |
|                          |     |                                                                                                                                                                                                                                                                                                                                                                                                               | n/a   |
| Descriptive data         | 14* | (a) Give characteristics of study participants (eg demographic, clinical, social) and information on exposures and potential confounders<br>(b) Indicate number of participants with missing data for each variable of interest                                                                                                                                                                               | 7,8   |
|                          |     |                                                                                                                                                                                                                                                                                                                                                                                                               | n/a   |
| Outcome data             | 15* | <i>Case-control study</i> —Report numbers in each exposure category, or summary measures of exposure<br><i>Cross-sectional study</i> —Report numbers of outcome events or summary measures                                                                                                                                                                                                                    | n/a   |
|                          |     |                                                                                                                                                                                                                                                                                                                                                                                                               | n/a   |
| Main results             | 16  | (a) Give unadjusted estimates and, if applicable, confounder-adjusted estimates and their precision (eg, 95% confidence interval). Make clear which confounders were adjusted for and why they were included<br>(b) Report category boundaries when continuous variables were categorized<br>(c) If relevant, consider translating estimates of relative risk into absolute risk for a meaningful time period | n/a   |
|                          |     |                                                                                                                                                                                                                                                                                                                                                                                                               | n/a   |
| Other analyses           | 17  | Report other analyses done—eg analyses of subgroups and interactions, and sensitivity analyses                                                                                                                                                                                                                                                                                                                | 17    |
| <b>Discussion</b>        |     |                                                                                                                                                                                                                                                                                                                                                                                                               |       |
| Key results              | 18  | Summarise key results with reference to study objectives                                                                                                                                                                                                                                                                                                                                                      | n/a   |
| Limitations              | 19  | Discuss limitations of the study, taking into account sources of potential bias or imprecision. Discuss both direction and magnitude of any potential bias                                                                                                                                                                                                                                                    | 21    |
| Interpretation           | 20  | Give a cautious overall interpretation of results considering objectives, limitations, multiplicity of analyses, results from similar studies, and other relevant evidence                                                                                                                                                                                                                                    | 19-21 |
| Generalisability         | 21  | Discuss the generalisability (external validity) of the study results                                                                                                                                                                                                                                                                                                                                         | 21    |
| <b>Other information</b> |     |                                                                                                                                                                                                                                                                                                                                                                                                               |       |
| Funding                  | 22  | Give the source of funding and the role of the funders for the present study and, if applicable, for the original study on which the present article is based                                                                                                                                                                                                                                                 | 24    |

\*Give information separately for cases and controls in case-control studies and, if applicable, for exposed and unexposed groups in cohort and cross-sectional studies.

**Note:** An Explanation and Elaboration article discusses each checklist item and gives methodological background and published examples of transparent reporting. The STROBE checklist is best used in conjunction with this article (freely available on the Web sites of PLoS Medicine at <http://www.plosmedicine.org/>, Annals of Internal Medicine at <http://www.annals.org/>, and Epidemiology at <http://www.epidem.com/>). Information on the STROBE Initiative is available at [www.strobe-statement.org](http://www.strobe-statement.org).
